# Supplementary material for: Modulation of Tomato Response to Rhizoctonia solani by Trichoderma harzianum and Its Secondary Metabolite Harzianic Acid
Source: Front Microbiol. 2018 Aug 30;9:1966. doi: 10.3389/fmicb.2018.01966 (PMC6127634; doi:10.3389/fmicb.2018.01966)
Supplement: Supplementary file 6 [file Data_Sheet_3.XLSX]

## Sheet: DEGs
Supplemental Dataset 3: Differentially expressed genes (DEGs) of Solanum lycopersicum cv. Micro-Tom infected with the soilborne pathogen Rhizoctonia solani and treated with harzianic acid (Solyc ID of DEGs; pvalue <0.05; -1<-fold change>1)
Coef	p,value,adj	Solyc ID	annotation ITAG 2.40
8.544	0.000579	Solyc08g082120.2.1	Methanol inducible protein (AHRD V1 ***- D1MAX5_NICBE)
8.533	0.000579	Solyc04g077020.2.1	Tubulin alpha-3 chain (AHRD V1 ***- B6SPX4_MAIZE)
8.372	0.000579	Solyc05g055160.2.1	DNAJ chaperone (AHRD V1 ***- B0W7V8_CULQU)
8.207	0.000579	Solyc08g006890.2.1	Tubulin alpha-3 chain (AHRD V1 ***- B6SPX4_MAIZE)
7.853	0.000579	Solyc06g036290.2.1	Heat shock protein 90 (Fragment) (AHRD V1 **-- Q00NU9_WHEAT)
7.643	0.000579	Solyc01g099670.2.1	40S ribosomal protein S10-like (AHRD V1 ***- Q2XTB2_SOLTU)
7.514	0.000985	Solyc10g079820.1.1	Early response to dehydration 15-like protein (Fragment) (AHRD V1 **-- Q5MED0_PSEMZ)
7.449	0.000579	Solyc06g074820.2.1	Aquaporin-like protein (AHRD V1 ***- D1M6Z5_CAPAN)
7.358	0.000579	Solyc11g011380.1.1	Glutamine synthetase (AHRD V1 ***- Q42950_TOBAC)
7.323	0.000737	Solyc08g081950.2.1	"Ubiquitin-conjugating enzyme E2 10 (AHRD V1 **** UBC10_ARATH)
7.235	0.000688	Solyc05g054760.2.1	"Dehydroascorbate reductase (Fragment) (AHRD V1 ***- Q1G0W3_SO
7.14	0.000579	Solyc02g084440.2.1	Fructose-bisphosphate aldolase (AHRD V1 ***- Q9SXX4_NICPA)
7.109	0.000651	Solyc07g064130.1.1	GO:0031386,GO:0043008 "Ubiquitin (AHRD V1 ***- Q39257
6.997	0.000629	Solyc04g017690.2.1	"Early response to dehydration 15-like protein (Fragment) (AHR
6.996	0.000737	Solyc03g096840.2.1	Seed specific protein Bn15D1B (AHRD V1 ***- B6TIB8_MAIZE)
6.963	0.000579	Solyc08g045710.1.1	GO:0045261,GO:0005524 "ATP synthase subunit alpha, mi
6.962	0.000688	Solyc09g082650.2.1	Acireductone dioxygenase (AHRD V1 **** A8UGP3_SOLTU)
6.93	0.000668	Solyc01g104470.2.1	"mRNA turnover protein 4 homolog (AHRD V1 **-- B5X718_SALSA)"
6.915	0.000823	Solyc07g056540.2.1	L-lactate dehydrogenase (AHRD V1 ***- C0S8Q7_PARBP)
6.874	0.001574	Solyc03g082570.2.1	"Ubiquitin (AHRD V1 ***- C0SFI2_PARBP)
6.852	0.000579	Solyc09g097770.2.1	Cell wall protein (AHRD V1 ***- Q40142_SOLLC)
6.775	0.000579	Solyc01g079880.2.1	Asparagine synthetase (AHRD V1 *--- Q9ZST6_ARATH)
6.65	0.001387	Solyc10g051380.1.1	GO:0008266 "Glycine-rich RNA-binding protein (AHRD V1
6.591	0.001224	Solyc03g005760.1.1	Chlorophyll a-b binding protein 3C-like (AHRD V1 **** Q2XTE0_SOLTU)
6.577	0.000603	Solyc04g025040.1.1	Unknown Protein (AHRD V1)
6.564	0.000579	Solyc09g014520.2.1	Chlorophyll a-b binding protein 6A, chloroplastic (AHRD V1 **** CB11_SOLLC)
6.532	0.000737	Solyc05g053670.2.1	"60S ribosomal protein L13a-like protein (AHRD V1 ***- Q3HRW1_
6.497	0.000651	Solyc11g051210.1.1	"Unknown Protein (AHRD V1)"
6.465	0.000651	Solyc08g013730.2.1	"Aquaporin (AHRD V1 ***- B3GK86_ARATH)
6.458	0.000826	Solyc08g061100.2.1	Cellulose synthase (AHRD V1 **** B9IKV7_POPTR)
6.436	0.000823	Solyc03g013620.1.1	GO:0055114 "NADH-quinone oxidoreductase subunit L (AH
6.409	0.00122	Solyc03g098780.1.1	Kunitz-type protease inhibitor (AHRD V1 **** Q3S488_SOLTU)
6.409	0.000758	Solyc12g005330.1.1	50S ribosomal protein L2 (AHRD V1 ***- RL2_EDWI9)
6.323	0.001499	Solyc10g008980.2.1	Triose phosphate/phosphate translocator (AHRD V1 **** Q9MSB6_MESCR)
6.313	0.000596	Solyc08g081190.2.1	Aquaporin 1 (AHRD V1 ***- O24662_TOBAC)
6.292	0.00139	Solyc01g088660.2.1	Os04g0585900 protein (Fragment) (AHRD V1 *-*- Q0JAP2_ORYSJ)
6.267	0.000627	Solyc01g056940.2.1	Ubiquitin (AHRD V1 ***- D3PHG3_9MAXI); contains Interpro domain(s)
6.257	0.000688	Solyc06g070980.2.1	Ubiquitin-conjugating enzyme E2 2 (AHRD V1 **** UBC2_MEDSA)
6.107	0.002129	Solyc03g118290.2.1	"Auxin response factor 2 (AHRD V1 **** Q2LAJ3_SOLLC)
6.096	0.00072	Solyc01g099840.2.1	Auxin-repressed protein (AHRD V1 ***- B4FA62_MAIZE
6.087	0.00084	Solyc01g111760.2.1	"V-type ATP synthase beta chain (AHRD V1 ***- VATB_PYRHO)
6.05	0.000668	Solyc06g072350.2.1	UPF0497 membrane protein 17 (AHRD V1 ***- U497H_RICCO);
6.027	0.00191	Solyc07g062870.2.1	"30S ribosomal protein S20 (AHRD V1 *-*- RS20_THEEB)
6.012	0.00084	Solyc03g006140.2.1	"Neutral ceramidase (AHRD V1 **** A9YFM2_WHEAT)
6.009	0.000908	Solyc07g040960.1.1	GO:0016042 "Os07g0175100 protein (Fragment) (AHRD V1
5.998	0.000668	Solyc03g097270.2.1	"Cysteine proteinase inhibitor (AHRD V1 **** Q5Y7Z8_PETHY)
5.996	0.000668	Solyc04g054980.2.1	Lipoxygenase homology domain-containing protein 1 (AHRD V1 *--- LOXH1_MOUSE)
5.984	0.00072	Solyc06g009630.1.1	GO:0005515 "CP12 (AHRD V1 ***- O24136_TOBAC)
5.955	0.001293	Solyc04g079970.2.1	Ubiquitin-conjugating enzyme E2 11 (AHRD V1 ***- UBC11_ARATH)
5.94	0.001336	Solyc06g050980.2.1	Ferritin (AHRD V1 ***- Q308A9_SOLTU)
5.829	0.00072	Solyc06g054260.1.1	Photosystem I reaction center subunit II (AHRD V1 ***- B4FAW3_MAIZE)
5.82	0.000691	Solyc09g008800.2.1	"60S ribosomal protein L24 (AHRD V1 ***- B3TM46_ELAGV)
5.819	0.000737	Solyc02g082700.2.1	"High mobility group protein (AHRD V1 **-- O49948_SOLTU)
5.807	0.001901	Solyc04g074040.2.1	"RNA-binding protein (AHRD V1 *--* O96461_SCHJA)
5.776	0.002253	Solyc04g018110.1.1	GO:0005509 "Calmodulin-like protein 1 (AHRD V1 *-*- B
5.774	0.002971	Solyc06g035870.2.1	"Membrane-associated progesterone receptor component 1 (AHRD V
5.77	0.000737	Solyc04g076850.2.1	Auxin responsive protein (AHRD V1 *-*- D9IQE6_CATRO)
5.76	0.000908	Solyc02g077750.2.1	Fiber protein Fb2 (AHRD V1 **-- B3TLS9_ELAGV);
5.758	0.000694	Solyc05g055440.1.1	GO:0005515,GO:0003677 "Histone H2B (AHRD V1 ***- Q2XP
5.733	0.001213	Solyc12g008590.1.1	Profilin (AHRD V1 ***- D6BRE6_9ROSI)
5.728	0.002248	Solyc01g103540.2.1	YTH domain family 2 (Predicted) (AHRD V1 *-*- B2GUU1_RAT)
5.726	0.000737	Solyc01g110440.2.1	Arginine decarboxylase (AHRD V1 **** Q9SCF0_DATST)
5.688	0.001446	Solyc01g007500.2.1	Photosystem II CP47 chlorophyll apoprotein (AHRD V1 ***- D3WBA3_9BORA)
5.683	0.000781	Solyc03g115900.2.1	Chlorophyll a-b binding protein P4, chloroplastic (AHRD V1 ***- CB24_PEA)
5.679	0.001411	Solyc10g006480.1.1	GO:0043008 "Ubiquitin (AHRD V1 ***- Q39257_PEA)
5.675	0.00191	Solyc04g077440.2.1	Squalene monooxygenase (AHRD V1 ***- Q506K3_DATIN)
5.673	0.001839	Solyc10g081100.1.1	Unknown Protein (AHRD V1)
5.649	0.001021	Solyc10g005670.1.1	"Regulator of ribonuclease activity A (AHRD V1 ***- B6T0A4_MAI
5.628	0.001282	Solyc08g062920.2.1	"Elongation factor EF-2 (AHRD V1 **** Q9SGT4_ARATH)
5.624	0.001154	Solyc06g069120.2.1	Unknown Protein (AHRD V1)
5.606	0.000792	Solyc07g005560.2.1	Eukaryotic translation initiation factor 5A (AHRD V1 ***- D6N3G5_GOSHI)
5.595	0.000891	Solyc12g008720.1.1	GO:0005840 "60S ribosomal protein L31 (AHRD V1 ***- B
5.591	0.000758	Solyc02g087240.2.1	"NADH-quinone oxidoreductase F subunit family protein (AHRD V1
5.586	0.000737	Solyc01g096450.2.1	Aspartic proteinase nepenthesin-1 (AHRD V1 **-- B6TDX6_MAIZE)
5.568	0.000758	Solyc02g070800.2.1	Ycf23 protein (AHRD V1 ***- Q7NE74_GLOVI);
5.556	0.00151	Solyc04g008460.2.1	Ribosomal protein L15 (AHRD V1 ***- B9GPA1_POPTR)
5.513	0.000737	Solyc11g006460.1.1	DNAJ chaperone (AHRD V1 ***- B0W7V8_CULQU)
5.502	0.000823	Solyc02g063070.2.1	"14-3-3 protein beta/alpha-1 (AHRD V1 **-- 143B1_DANRE)
5.496	0.001266	Solyc02g080370.2.1	Tobamovirus multiplication protein (Fragment) (AHRD V1 ***- B0ZZ80_ARAHY)
5.484	0.000743	Solyc10g078300.1.1	Single-stranded nucleic acid binding R3H protein (Fragment) (AHRD V1 *-*- B3VWW5_POPTN)
5.483	0.000808	Solyc03g096360.2.1	"60S ribosomal protein L33-B (AHRD V1 ***- B6T1L8_MAIZE)
5.476	0.000823	Solyc06g009970.2.1	Elongation factor 1-alpha (AHRD V1 ***- Q8H9C0_SOLTU)
5.469	0.009703	Solyc07g065030.2.1	"Syntaxin-8 (AHRD V1 ***- C1C0H0_9MAXI)
5.447	0.00139	Solyc03g083530.2.1	"40S ribosomal protein S13 (AHRD V1 ***- D7LRU2_ARALY)
5.434	0.000908	Solyc01g109660.2.1	Glycine-rich RNA-binding protein (AHRD V1 *-** B2YKT9_TOBAC)
5.42	0.007087	Solyc08g008220.2.1	"Ubiquitin-conjugating enzyme E2 10 (AHRD V1 ***- UBC10_ARATH)
5.418	0.00198	Solyc02g084230.1.1	GO:0003700 "GAGA-binding transcriptional activator (A
5.407	0.00388	Solyc06g050120.2.1	"Ribosomal protein L7a (AHRD V1 ***- A8J567_CHLRE)
5.399	0.001476	Solyc12g055800.1.1	V-type ATP synthase alpha chain (AHRD V1 ***- VATA_METTH)
5.398	0.001186	Solyc02g077040.2.1	"Cathepsin B-like cysteine proteinase 5 (AHRD V1 **-* CPR5_CAE
5.385	0.001071	Solyc01g095200.2.1	Reticulon family protein (AHRD V1 ***- B2WS91_9BRAS)
5.361	0.00113	Solyc11g012320.1.1	Unknown Protein (AHRD V1)
5.315	0.000833	Solyc08g076540.2.1	"Syntaxin-like protein (AHRD V1 ***- Q3HRZ4_SOLTU)
5.305	0.000891	Solyc04g082200.2.1	Dehydrin (AHRD V1 *-*- Q1A4H3_COFCA)
5.304	0.001395	Solyc02g086930.2.1	"Homeobox-leucine zipper-like protein (AHRD V1 *-*- Q3HRT1_PIC
5.299	0.001176	Solyc04g082010.1.1	Plastocyanin (AHRD V1 ***- Q0W9E5_SOLCO)
5.292	0.001265	Solyc08g006040.2.1	"40S ribosomal protein S6 (AHRD V1 ***- B6T1H0_MAIZE)
5.288	0.000823	Solyc02g030170.2.1	"FAD linked oxidase domain protein (AHRD V1 **-- D1VPW7_9ACTO)
5.286	0.000876	Solyc07g052480.2.1	Isocitrate lyase (AHRD V1 **** Q9FQD2_IPOBA)
5.286	0.003246	Solyc09g059040.2.1	Alcohol dehydrogenase zinc-containing (AHRD V1 *-*- D3UKE0_LISSS)
5.272	0.001863	Solyc03g120470.2.1	Aquaporin (AHRD V1 *-*- O81186_VERFO)
5.25	0.001266	Solyc02g065400.2.1	Oxygen-evolving enhancer protein 1 of photosystem II (AHRD V1 ***- A8J0E4_CHLRE)
5.25	0.000882	Solyc03g019780.2.1	"40S ribosomal protein SA (AHRD V1 ***- B6T6X2_MAIZE)
5.245	0.001292	Solyc07g066600.2.1	Phosphoglycerate kinase (AHRD V1 ***- Q2VCK2_SOLTU)
5.225	0.002235	Solyc07g061790.2.1	Heme-binding protein 2 (AHRD V1 **** B6T0C0_MAIZE)
5.216	0.005929	Solyc06g083190.2.1	Peptidyl-prolyl cis-trans isomerase (AHRD V1 ***- Q86M29_BRUMA)
5.21	0.000908	Solyc11g069440.1.1	Ribosomal protein L12 (AHRD V1 ***- A8J597_CHLRE)
5.208	0.001186	Solyc08g075890.2.1	Cyclin-dependent kinase F-4 (AHRD V1 **** CDKF4_ORYSJ)
5.188	0.001186	Solyc02g070440.2.1	Katanin p60 ATPase-containing subunit A (AHRD V1 **-* D0P3C9_PHYIN)
5.173	0.00106	Solyc07g006280.2.1	Senescence-associated protein (AHRD V1 ***- B3TLS7_ELAGV)
5.157	0.002729	Solyc01g088370.2.1	Eukaryotic translation initiation factor 3 subunit B (AHRD V1 **** B2VZ72_PYRTR)
5.157	0.001369	Solyc01g107380.2.1	Seed maturation protein PM23 (Fragment) (AHRD V1 ***- Q9SEL1_SOYBN)
5.129	0.001029	Solyc03g112150.1.1	GO:0003746 "Elongation factor Tu (AHRD V1 **** D7MFK2
5.128	0.001266	Solyc04g053080.2.1	"OTU domain-containing protein 6B (AHRD V1 ***- B6TYC6_MAIZE)
5.111	0.00145	Solyc12g044600.2.1	NADP-dependent malic enzyme, chloroplastic (AHRD V1 ***- MAOC_FLAPR)
5.107	0.001411	Solyc05g053810.2.1	Serine hydroxymethyltransferase (AHRD V1 **** D2D306_GOSHI)
5.104	0.004935	Solyc06g035970.2.1	"Tubulin beta chain (AHRD V1 ***- B9GKJ5_POPTR)
5.096	0.001078	Solyc07g052980.2.1	"Xyloglucan endotransglucosylase/hydrolase 5 (AHRD V1 **** C0I
5.085	0.001406	Solyc10g005560.2.1	"Bi-ubiquitin (AHRD V1 ***- A8IZZ4_CHLRE)
5.081	0.001176	Solyc11g070130.1.1	GO:0030036,GO:0015629 "Profilin (AHRD V1 ***- Q8VWR0_
5.077	0.001887	Solyc06g074720.2.1	"MKI67 FHA domain-interacting nucleolar phosphoprotein-like (A
5.074	0.010756	Solyc08g075700.2.1	60S ribosomal protein L13 (AHRD V1 ***- Q3HRY7_SOLTU)
5.071	0.00181	Solyc02g084410.2.1	"Glyoxalase (AHRD V1 ***- B4ERW1_WHEAT)
5.063	0.001182	Solyc02g080630.2.1	Lactoylglutathione lyase (AHRD V1 ***- D2D330_GOSHI)
5.058	0.001327	Solyc03g123630.2.1	"Pectinesterase (AHRD V1 ***- Q564D7_SOLLC)
5.048	0.002921	Solyc10g050860.1.1	GO:0005515 "Polyadenylate-binding protein 4 (AHRD V1
5.044	0.00153	Solyc01g067730.2.1	Acyl carrier protein (AHRD V1 ***- Q9XF20_CAPCH)
5.039	0.002248	Solyc01g067660.2.1	Beta-amylase (AHRD V1 **** Q5F304_SOYBN)
5.025	0.001935	Solyc03g082380.2.1	"Arginine/serine-rich splicing factor (AHRD V1 ***- B0WP07_CUL
5.016	0.001639	Solyc06g063310.1.1	"Fiber protein Fb15 (Fragment) (AHRD V1 ***- B4UW72_ARAHY)"
5.01	0.003528	Solyc02g078940.2.1	"Zinc-binding dehydrogenase superfamily (Quinone oxidoreductas
5.009	0.00113	Solyc09g091750.2.1	26S proteasome regulatory subunit (AHRD V1 ***- O48844_ARATH)
5.003	0.001405	Solyc11g021060.1.1	Proteinase inhibitor (AHRD V1 ***- Q40378_NICAL)
5.001	0.001266	Solyc05g054350.2.1	Epoxide hydrolase (AHRD V1 **** Q41414_SOLTU)
4.997	0.002042	Solyc08g079870.1.1	Subtilisin-like protease (AHRD V1 **-- Q9LWA3_SOLLC)
4.987	0.005917	Solyc02g062250.2.1	"Peptidyl-prolyl cis-trans isomerase C (AHRD V1 *--* PPIC_ECOL
4.982	0.001369	Solyc07g043390.2.1	Cellulose synthase family protein expressed (AHRD V1 **** Q339N6_ORYSJ)
4.98	0.001173	Solyc09g092380.2.1	"Adenosylhomocysteinase (AHRD V1 **** Q2XTD0_SOLTU)
4.98	0.001265	Solyc01g100380.2.1	Calreticulin 2 calcium-binding protein (AHRD V1 **** A8HMC0_CHLRE)
4.976	0.002026	Solyc08g079250.2.1	"Lipid transfer protein (AHRD V1 *-** O22110_PICAB)
4.971	0.00149	Solyc01g104950.2.1	"Alpha-L-arabinofuranosidase/beta-D-xylosidase (AHRD V1 **** D
4.96	0.00701	Solyc02g080760.1.1	Glycine-rich protein (AHRD V1 *-*- Q41349_SOLLC)
4.951	0.001078	Solyc08g005800.2.1	"Pectinacetylesterase like protein (Fragment) (AHRD V1 **-- Q5
4.949	0.00157	Solyc01g009170.2.1	"Ethylene insensitive 3 class transcription factor (AHRD V1 **
4.943	0.001985	Solyc08g082820.2.1	Heat shock protein (AHRD V1 ***- Q84KP8_CYAME)
4.938	0.00162	Solyc04g078830.2.1	THO complex subunit 5 homolog (AHRD V1 *-*- THOC5_DANRE)
4.935	0.004338	Solyc03g119700.2.1	"ATP-dependent Clp protease adaptor protein ClpS containing pr
4.934	0.005144	Solyc05g054410.2.1	Telomere binding protein (AHRD V1 **** A0JBS3_SOLLC)
4.929	0.001849	Solyc01g080280.2.1	Glutamine synthetase (AHRD V1 ***- B5LAU9_CAPAN)
4.928	0.001186	Solyc10g017850.2.1	"Peroxisomal membrane protein 11-1 (AHRD V1 ***- PX111_ORYSJ)
4.917	0.001398	Solyc08g060920.2.1	and polytropic retrovirus receptor (AHRD V1 **-- B2GU54_XENTR)
4.903	0.002311	Solyc01g008950.2.1	Calmodulin 5/6/7/8-like protein (AHRD V1 ***- Q3HVL6_SOLTU)
4.896	0.003494	Solyc10g075070.1.1	Non-specific lipid-transfer protein (AHRD V1 ***- A7UGG9_SOLTU)
4.894	0.002934	Solyc01g107820.2.1	UDP-glucosyltransferase family 1 protein (AHRD V1 **** C6KI43_CITSI)
4.894	0.002728	Solyc02g068430.2.1	Choline-phosphate cytidylyltransferase B (AHRD V1 **** B4F7T8_MAIZE)
4.889	0.001763	Solyc04g056390.2.1	Isopentenyl-diphosphate delta-isomerase (AHRD V1 **** Q84RZ8_9GENT)
4.886	0.001639	Solyc01g101240.2.1	"Aspartic proteinase (AHRD V1 **** ASPRX_ORYSJ)
4.885	0.001945	Solyc11g073050.1.1	GO:0015031,GO:0007264,GO:0005525,GO:0007165,GO:0005622 functional_descriptio
4.858	0.002	Solyc01g067710.2.1	Sodium/hydrogen exchanger (AHRD V1 **** Q1JRA3_SOLLC)
4.834	0.004119	Solyc04g080740.1.1	GO:0046982 "BZIP transcription factor family protein
4.826	0.001411	Solyc02g080810.2.1	Aminomethyltransferase (AHRD V1 ***- C6TF02_SOYBN)
4.773	0.002728	Solyc07g064040.2.1	"Transcription factor (Fragment) (AHRD V1 **-* D6MKL1_9ASPA)
4.764	0.002773	Solyc11g039980.1.1	GO:0016469 "ATP synthase subunit alpha (AHRD V1 ***-
4.763	0.001396	Solyc09g090110.2.1	"Actin depolymerizing factor 6 (AHRD V1 **** Q8H9D5_SOLTU)
4.743	0.004918	Solyc01g099690.2.1	ATP-dependent Clp protease proteolytic subunit (AHRD V1 ***- B9RFA9_RICCO)
4.742	0.001292	Solyc07g008370.2.1	"60S ribosomal protein L7 (AHRD V1 ***- D7MY49_ARALY)
4.738	0.004435	Solyc10g047930.1.1	GO:0033743,GO:0000318 "Peptide methionine sulfoxide r
4.725	0.003066	Solyc12g096540.1.1	"40S ribosomal protein S10-like (AHRD V1 ***- Q2XPV4_SOLTU)
4.722	0.001692	Solyc11g068420.1.1	GO:0032183,GO:0003735 "Ribosomal protein (AHRD V1 ***
4.721	0.001439	Solyc05g050200.2.1	"Eukaryotic translation initiation factor 1A (AHRD V1 **** Q7Y
4.719	0.013683	Solyc01g111170.2.1	Peptidyl-prolyl cis-trans isomerase (AHRD V1 ***- Q9XF12_SOLTU)
4.718	0.001266	Solyc08g067030.2.1	Os01g0611000 protein (Fragment) (AHRD V1 ***- Q0JLB5_ORYSJ)
4.713	0.001603	Solyc01g009990.2.1	Peptidyl-prolyl cis-trans isomerase (AHRD V1 ***- B9RMA5_RICCO)
4.713	0.001499	Solyc10g047630.1.1	Nitrilase/cyanide hydratase and apolipoprotein N-acyltransferase (AHRD V1 **-- C7PTC3_CHIPD)
4.709	0.001725	Solyc05g005490.2.1	Carbonic anhydrase (AHRD V1 ***- Q5NE21_SOLLC)
4.701	0.001853	Solyc07g047800.2.1	"Short-chain dehydrogenase/reductase family protein (AHRD V1 *
4.7	0.001406	Solyc12g006470.1.1	Aminotransferase-like protein (AHRD V1 ***- Q9LIE2_ARATH)
4.696	0.00153	Solyc01g099900.2.1	Ribosomal protein L18 (AHRD V1 ***- C5X0Q5_SORBI)
4.694	0.013723	Solyc01g007330.2.1	Ribulose bisphosphate carboxylase large chain (AHRD V1 ***- RBL_SOLLC)
4.693	0.001411	Solyc12g039120.1.1	GO:0005840 "40S ribosomal protein S19-like (AHRD V1 *
4.682	0.001369	Solyc04g072450.2.1	Unknown Protein (AHRD V1)
4.681	0.002151	Solyc10g083280.1.1	GO:0005840 "30S ribosomal protein S11 (AHRD V1 ***- R
4.668	0.001804	Solyc05g050800.2.1	Phosphoglycerate mutase family protein (AHRD V1 ***- C3SAD0_BRADI);
4.664	0.001411	Solyc04g071620.2.1	ASR4 (Fragment) (AHRD V1 *-*- Q2QJU1_SOLLC)
4.663	0.002466	Solyc04g054910.2.1	"Ethylene-responsive transcription factor 13 (AHRD V1 *-*- ERF
4.658	0.002215	Solyc06g005360.2.1	"Actin depolymerizing factor 3 (AHRD V1 **** A1XJ46_GOSHI)
4.655	0.00162	Solyc10g075150.1.1	Non-specific lipid-transfer protein (AHRD V1 **** Q9ZPI9_CAPAN)
4.654	0.001441	Solyc05g012160.2.1	Nitrilase associated protein-like (Fragment) (AHRD V1 *--- Q1HEA6_MUSAC)
4.654	0.001266	Solyc01g100140.2.1	Protein DEHYDRATION-INDUCED 19 homolog 3 (AHRD V1 **-- DI193_ARATH)
4.622	0.001387	Solyc06g072490.2.1	"40S ribosomal protein S1 (AHRD V1 ***- RS3A_LACBS)
4.602	0.001772	Solyc10g083760.1.1	GO:0008152,GO:0006520,GO:0009097 "Threonine dehydrata
4.6	0.003494	Solyc06g076570.1.1	class I heat shock protein (AHRD V1 ***- Q69BI7_CARPA)
4.592	0.00162	Solyc09g061310.2.1	PPPDE peptidase domain containing 2a (AHRD V1 *--- Q6PC81_DANRE)
4.583	0.001336	Solyc02g091280.2.1	"ATP-dependent Clp protease proteolytic subunit (AHRD V1 ****
4.576	0.001493	Solyc01g110530.2.1	Peptidyl-prolyl cis-trans isomerase C (AHRD V1 *--* PPIC_ECOLI)
4.575	0.004401	Solyc04g071070.2.1	Unknown Protein (AHRD V1)
4.57	0.004252	Solyc10g049710.1.1	GO:0006508 "ATP-dependent Clp protease proteolytic su
4.566	0.002055	Solyc06g007520.2.1	Ribosomal protein L10 (AHRD V1 ***- A8IZK3_CHLRE)
4.562	0.005656	Solyc04g009030.2.1	Glyceraldehyde-3-phosphate dehydrogenase (AHRD V1 **** D7UNZ5_BRARC)
4.554	0.001411	Solyc09g083290.2.1	Auxin responsive protein (AHRD V1 ***- D9IQE6_CATRO)
4.552	0.003852	Solyc01g107590.2.1	"Cinnamyl alcohol dehydrogenase (AHRD V1 **** C1IC55_GOSHI)
4.547	0.001561	Solyc10g077040.1.1	Magnesium-protoporphyrin IX monomethyl ester (AHRD V1 **** B9SCF8_RICCO)
4.546	0.001647	Solyc05g047690.2.1	"Histone deacetylase complex subunit SAP18 (AHRD V1 ***- B4FIB
4.542	0.001853	Solyc01g095430.2.1	endopeptidase (AHRD V1 **-- B6TCN7_MAIZE)"
4.542	0.004859	Solyc12g014400.1.1	Cell differentiation protein rcd1 (AHRD V1 ***- B6TRX0_MAIZE)
4.534	0.001461	Solyc10g006560.2.1	"Histone H2A (AHRD V1 ***- A9PCS9_POPTR)
4.533	0.002253	Solyc01g059930.2.1	"Universal stress protein (AHRD V1 ***- D6BRD7_9ROSI)
4.533	0.00153	Solyc12g098150.1.1	GO:0055085,GO:0055114 "Voltage-gated potassium channe
4.532	0.001945	Solyc01g111150.2.1	"Translocon-associated protein alpha subunit (AHRD V1 ***- B6S
4.531	0.00153	Solyc01g008780.2.1	Phospholipase A22 (AHRD V1 ***- B9SJ74_RICCO)
4.529	0.001406	Solyc01g096660.2.1	Genomic DNA chromosome 5 P1 clone MOJ9 (AHRD V1 ***- Q9FL44_ARATH)
4.515	0.002235	Solyc03g113910.2.1	Gibberellin-regulated protein 2 (AHRD V1 *--- B6SKV6_MAIZE);
4.505	0.001731	Solyc03g118130.2.1	"Rubredoxin-like protein (AHRD V1 *--- A8JGB1_CHLRE)
4.503	0.005283	Solyc02g089160.2.1	Cytochrome P450 GO:0020037,GO:0055114 GO:0004497 GO:0004497,GO:0020037,GO:0055114
4.497	0.005814	Solyc10g006900.2.1	"Protochlorophyllide reductase (AHRD V1 ***- Q8LAV9_ARATH)
4.496	0.003288	Solyc06g083530.2.1	"Vesicle-associated membrane protein 7B (AHRD V1 **-- D7KE74_A
4.489	0.001863	Solyc08g016180.2.1	"60S ribosomal protein L18a (AHRD V1 ***- D2D962_9ROSI)
4.478	0.004893	Solyc01g011000.2.1	"Eukaryotic translation initiation factor 5A (AHRD V1 **** D6N
4.477	0.003287	Solyc05g054810.2.1	"60S ribosomal protein L35 (AHRD V1 ***- D7M7V2_ARALY)
4.471	0.002344	Solyc10g076360.1.1	Prenylated rab acceptor PRA1 (AHRD V1 ***- A2Q469_MEDTR)
4.471	0.001772	Solyc10g018300.1.1	Transketolase 1 (AHRD V1 **** O78327_CAPAN)
4.464	0.01157	Solyc08g023660.2.1	"Major latex-like protein (AHRD V1 **-- B5THI3_PANGI)
4.463	0.005418	Solyc01g101040.2.1	"ATP-citrate lyase A-3 (AHRD V1 **** D7KJQ3_ARALY)
4.462	0.004677	Solyc01g010580.2.1	Ribosomal protein (AHRD V1 ***- B3TM27_ELAGV); contains Interpro domain(s)
4.461	0.012348	Solyc10g075100.1.1	Non-specific lipid-transfer protein (AHRD V1 **** Q4A1N1_SOLLC)
4.461	0.005737	Solyc07g062700.2.1	Sodium/calcium exchanger family protein (AHRD V1 ***- D7KKF3_ARALY)
4.456	0.001772	Solyc02g083250.2.1	Cellular retinaldehyde-binding/triple function C-terminal (AHRD V1 **-- B6SN40_MAIZE)
4.448	0.001872	Solyc06g067880.2.1	"V-type proton ATPase proteolipid subunit (AHRD V1 **** D3PI45
4.427	0.002235	Solyc08g079830.2.1	Cu/Zn-superoxide dismutase copper chaperone (AHRD V1 **** Q9BBU5_SOYBN)
4.424	0.002023	Solyc02g067420.2.1	"Ubiquitin-conjugating enzyme E2 2 (AHRD V1 ***- UBC2_WHEAT)
4.422	0.001872	Solyc08g077880.2.1	Light harvesting-like protein 3 (AHRD V1 **-- B9N2V9_POPTR)
4.422	0.020233	Solyc11g008580.1.1	Ariadne-like ubiquitin ligase (AHRD V1 **-- D3AZ84_POLPA)
4.421	0.002235	Solyc01g100500.2.1	Microfibrillar-associated protein 1 (AHRD V1 *-*- C1BVS1_9MAXI)
4.419	0.00191	Solyc02g092270.2.1	"NADH dehydrogenase (AHRD V1 -**- NDUS4_RAT)
4.413	0.003111	Solyc10g081570.1.1	KED (AHRD V1 *-*- Q9LW95_TOBAC)
4.413	0.00463	Solyc01g106210.2.1	Chaperone DnaK (AHRD V1 ***- A2Q199_MEDTR)
4.397	0.002283	Solyc02g083320.2.1	"RNA-binding protein (AHRD V1 *--* B6JZH8_SCHJY)
4.393	0.001945	Solyc07g045240.2.1	"RNA-binding protein-like (AHRD V1 *--* Q8L779_ARATH)
4.389	0.00263	Solyc09g064630.2.1	"TPR domain protein (AHRD V1 *--- B6U810_MAIZE)
4.386	0.00151	Solyc01g006900.2.1	Phosphatidylglycerol/phosphatidylinositol transfer protein (AHRD V1 -**- C5M4H0_CANTT)
4.371	0.002344	Solyc03g063290.2.1	Homology to unknown gene (AHRD V1 ***- Q00YC2_OSTTA)
4.367	0.00263	Solyc07g006150.2.1	Transmembrane protein 208 (AHRD V1 ***- C1C182_9MAXI)
4.365	0.002026	Solyc12g036200.1.1	Peptidyl-prolyl cis-trans isomerase (AHRD V1 *-*- Q2F670_BOMMO)
4.363	0.002321	Solyc09g010690.2.1	Ankyrin repeat domain-containing protein 28 (AHRD V1 ***- B6TJ47_MAIZE)
4.341	0.002221	Solyc01g111440.2.1	Senescence-associated protein 12 (AHRD V1 *-*- O81657_HEMSP)
4.333	0.001804	Solyc03g031700.2.1	"ABC transporter FeS assembly protein SufB (AHRD V1 ***- C7JBP
4.32	0.001618	Solyc03g115820.2.1	Ribulose-5-phosphate-3-epimerase (AHRD V1 ***- Q8S4X2_PEA)
4.32	0.001934	Solyc11g069430.1.1	Aquaporin 1 (AHRD V1 ***- Q9M4T0_ALLCE)
4.317	0.004943	Solyc03g025410.2.1	Dehydrogenase/reductase SDR family member 13 (AHRD V1 ***- DHR13_BOVIN)
4.315	0.002235	Solyc08g066800.2.1	"Phospholipase D (AHRD V1 **** Q9FR61_SOLLC)
4.313	0.006344	Solyc01g097290.2.1	Auxin responsive protein (AHRD V1 ***- D9IQE6_CATRO)
4.312	0.001863	Solyc06g083010.1.1	"Unknown Protein (AHRD V1)"
4.308	0.0022	Solyc03g083520.2.1	"Calmodulin (AHRD V1 ***- B6T4U8_MAIZE)
4.306	0.002248	Solyc01g108500.2.1	Polyadenylate-binding protein (AHRD V1 **-* PABP_DROME)
4.303	0.002877	Solyc04g051800.2.1	ABC transporter ATP-binding protein (AHRD V1 ***- D4ZPJ5_SPIPL)
4.295	0.003297	Solyc09g007920.2.1	Phenylalanine ammonia-lyase (AHRD V1 **** B5LAW0_CAPAN)
4.278	0.001876	Solyc02g092440.2.1	Mitochondrial porin (Voltage-dependent anion channel) outer membrane protein (AHRD V1 **** C4R1Z2_PICPG)
4.278	0.004918	Solyc08g080920.2.1	"Phosphopantothenoylcysteine decarboxylase (AHRD V1 **-* B4FCR
4.277	0.00275	Solyc06g009210.2.1	Ribosomal protein L19 (AHRD V1 ***- Q2PYW9_SOLTU)
4.271	0.003236	Solyc10g083970.1.1	S-adenosylmethionine synthase (AHRD V1 ***- B5LAW6_CAPAN)
4.268	0.002267	Solyc09g009020.2.1	Enolase (AHRD V1 ***- C5J0G6_TOBAC)
4.268	0.001772	Solyc05g005880.2.1	30S ribosomal protein S13 (AHRD V1 ***- B6TG65_MAIZE)
4.264	0.002248	Solyc11g006770.1.1	GO:0005515 "AMMECR1 family (AHRD V1 **-- D7LBR0_ARALY
4.261	0.00162	Solyc02g067460.2.1	Porin/voltage-dependent anion-selective channel protein (AHRD V1 **** A9P802_POPTR)
4.257	0.001772	Solyc07g063430.2.1	Mpv17 protein (AHRD V1 *--- B0WWR6_CULQU)
4.256	0.002035	Solyc04g054740.2.1	Inositol-3-phosphate synthase (AHRD V1 ***- C4PW06_ARATH)
4.236	0.001747	Solyc02g078400.2.1	"Allantoinase (AHRD V1 **** Q6S4R9_ROBPS)
4.236	0.001945	Solyc03g123720.2.1	Protein-O-fucosyltransferase-like protein (AHRD V1 ***- D8RI05_SELML)
4.233	0.001909	Solyc02g089820.2.1	"Proteasome maturation protein (AHRD V1 ***- A5HKJ3_RAT)
4.231	0.00199	Solyc08g074630.1.1	GO:0008152,GO:0055114 "Polyphenol oxidase (AHRD V1 **
4.228	0.009442	Solyc08g079260.2.1	Serine/threonine-protein phosphatase (Fragment) (AHRD V1 *--- Q4RFT2_TETNG)
4.224	0.003827	Solyc04g082140.2.1	Laccase-22 (AHRD V1 **-- LAC22_ORYSJ)
4.219	0.03112	Solyc10g080700.1.1	GO:0006468 "Casein kinase-like protein (AHRD V1 ***-
4.218	0.005888	Solyc10g005730.2.1	WD-40 repeat family protein (AHRD V1 **-- D7L1D2_ARALY)
4.21	0.001708	Solyc04g081870.2.1	Expansin (AHRD V1 ***- Q9FVH0_SOLLC)
4.209	0.003642	Solyc01g100320.2.1	Thioredoxin/protein disulfide isomerase (AHRD V1 **** Q2U681_ASPOR)
4.206	0.001772	Solyc01g094690.2.1	Aquaporin (AHRD V1 ***- Q40266_MESCR)
4.205	0.001779	Solyc11g005450.1.1	Transcription elongation factor A protein 3 (AHRD V1 *--- TCEA3_BOVIN)
4.205	0.004112	Solyc05g055940.2.1	Myb family transcription factor (AHRD V1 **-* D7M706_ARALY)
4.204	0.002023	Solyc03g120010.2.1	Eukaryotic translation initiation factor 3 subunit 2 (AHRD V1 **-- B6SSB6_MAIZE)
4.196	0.00575	Solyc03g111700.2.1	Inactivated Zn-dependent hydrolase of the beta-lactamase fold (AHRD V1 ***- B5ILK8_9CHRO)
4.162	0.001953	Solyc12g099200.1.1	Invertase inhibitor (AHRD V1 **** O49908_TOBAC)
4.16	0.002773	Solyc10g083360.1.1	"Calmodulin binding protein (AHRD V1 ***- B6SL12_MAIZE)"
4.158	0.005766	Solyc11g065100.1.1	GO:0005488 "Mitochondria fission 1 protein (AHRD V1 *
4.154	0.004546	Solyc02g083860.2.1	Flavanone 3-hydroxylase (AHRD V1 ***- A9ZMI9_TOBAC)
4.152	0.001978	Solyc06g051400.2.1	Omega-3 fatty acid desaturase (AHRD V1 **** Q7X7I9_SOLLC)
4.149	0.006505	Solyc12g095860.1.1	Cell division protein kinase 2 (AHRD V1 **** B5X1T4_SALSA)
4.145	0.002141	Solyc08g074620.1.1	Polyphenol oxidase (AHRD V1 ***- Q41428_SOLTU)
4.143	0.002919	Solyc01g021640.2.1	DDB1- and CUL4-associated factor 4 (AHRD V1 **-- DCAF4_BOVIN)
4.137	0.030643	Solyc04g074580.1.1	GO:0042802 "Histone H3 (AHRD V1 ***- A8MRL0_ARATH)
4.135	0.002227	Solyc01g066590.2.1	Dynein light chain 2 cytoplasmic (AHRD V1 ***- B5XH01_SALSA)
4.132	0.006673	Solyc02g086880.2.1	"Formate dehydrogenase (AHRD V1 **** Q5NE18_SOLLC)
4.119	0.002725	Solyc05g005190.2.1	"ADP-ribosylation factor (AHRD V1 ***- Q76ME3_WHEAT)
4.119	0.002248	Solyc10g078590.1.1	Unknown Protein (AHRD V1)
4.118	0.001872	Solyc06g060290.2.1	Protein disulfide isomerase (AHRD V1 **** B1Q2X4_SOYBN)
4.115	0.002728	Solyc01g005440.2.1	Jasmonate ZIM-domain protein 3 (AHRD V1 **-- B2XVS2_SOLLC)
4.098	0.002026	Solyc10g083120.1.1	GO:0043687 "Ubiquitin-conjugating enzyme family prote
4.093	0.010874	Solyc11g020690.1.1	"Unknown Protein (AHRD V1)"
4.086	0.002442	Solyc10g078690.1.1	GO:0005743 "Mitochondrial protein translocase family
4.086	0.002265	Solyc04g054810.2.1	allergen Phl p 11 (AHRD V1 ***- B6T2Z8_MAIZE)
4.078	0.002215	Solyc02g085790.2.1	T-complex protein 1 subunit zeta (AHRD V1 ***- B6U118_MAIZE)
4.076	0.002235	Solyc01g060470.2.1	Importin alpha-1b subunit (AHRD V1 ***- B6T451_MAIZE)
4.071	0.004108	Solyc02g086240.2.1	"50S ribosomal protein L5 (AHRD V1 ***- RL5_XANP2)
4.071	0.011594	Solyc02g092430.1.1	GO:0003735,GO:0003723 "Ribosomal protein L26 (AHRD V1
4.07	0.007012	Solyc02g077480.1.1	Histone H3 (AHRD V1 ***- D8L9K7_WHEAT)
4.066	0.001978	Solyc01g049890.2.1	Unknown Protein (AHRD V1)
4.057	0.002199	Solyc11g013110.1.1	Anthocyanidin synthase (AHRD V1 **** B2M0X8_GINBI)
4.056	0.015976	Solyc05g014470.2.1	Glyceraldehyde 3-phosphate dehydrogenase (AHRD V1 **** Q8LK04_SOLTU)
4.055	0.003629	Solyc01g109300.2.1	4-hydroxy-3-methylbut-2-enyl diphosphate reductase (AHRD V1 ***- A2TGW4_9LAMI)
4.05	0.002705	Solyc10g086330.1.1	GO:0005840,GO:0000166 "60S ribosomal protein L23a (AH
4.048	0.004672	Solyc01g006940.2.1	Poly(U)-binding-splicing factor PUF60 (AHRD V1 *--* PUF60_BOVIN)
4.048	0.002055	Solyc07g063040.2.1	Enolase-phosphatase E-1 (AHRD V1 *-*- A8UQN2_9AQUI)
4.046	0.001953	Solyc01g009430.2.1	Os02g0448600 protein (Fragment) (AHRD V1 *--- Q0E1G8_ORYSJ)
4.044	0.005144	Solyc12g095990.1.1	ATP-dependent RNA helicase eIF4A (AHRD V1 ***- A8PG49_COPC7)
4.04	0.002235	Solyc03g114950.2.1	Lipid a export ATP-binding/permease protein msba (AHRD V1 ***- Q17P67_AEDAE)
4.039	0.003606	Solyc07g016150.2.1	"Elongation factor 1-beta (AHRD V1 ***- D7KES3_ARALY)
4.038	0.007264	Solyc10g086220.1.1	Flavin oxidoreductase/NADH oxidase (AHRD V1 **-- A0YMI2_LYNSP)
4.037	0.00241	Solyc11g072340.1.1	Arginine/serine-rich splicing factor (AHRD V1 **-- D8L816_9POAL)
4.034	0.00964	Solyc01g100350.2.1	ADP-ribosylation factor-like protein 3 (AHRD V1 **-- ARL3_CAEEL)
4.034	0.003113	Solyc07g049720.2.1	DNA topoisomerase I (AHRD V1 **** Q9XGL1_DAUCA)
4.029	0.003925	Solyc12g006460.1.1	Cytochrome P450 GO:0020037,GO:0055114 GO:0051777 GO:0020037,GO:0051777,GO:0055114
4.025	0.001972	Solyc10g054560.1.1	GO:0046961 "V-type proton ATPase 16 kDa proteolipid s
4.023	0.002055	Solyc05g013530.2.1	Octicosapeptide/Phox/Bem1p domain-containing protein (AHRD V1 *--- D7LRK8_ARALY)
4.019	0.002933	Solyc11g006990.1.1	Os06g0207500 protein (Fragment) (AHRD V1 **-- Q0DDQ9_ORYSJ)
4.017	0.002837	Solyc09g025270.2.1	"U-box domain-containing protein 3 (AHRD V1 **-- PUB3_ARATH)
4.008	0.002423	Solyc02g087150.2.1	"Heavy-metal-associated domain-containing protein (AHRD V1 *-*
4.007	0.006452	Solyc06g053200.2.1	6-phosphogluconolactonase (AHRD V1 **** B6UAK0_MAIZE)
4.004	0.008035	Solyc05g054580.2.1	60S acidic ribosomal protein P0 (AHRD V1 ***- D7L9V8_ARALY)
4.004	0.007176	Solyc03g005120.2.1	Cystine transporter Cystinosin (AHRD V1 **** Q2URL9_ASPOR)
3.994	0.007563	Solyc06g073720.1.1	Ethylene insensitive 3 class transcription factor (AHRD V1 **** D5L146_MALDO)
3.992	0.002235	Solyc12g056250.1.1	Glutathione S-transferase (AHRD V1 ***- Q9M558_EUPES)
3.99	0.002342	Solyc04g071340.2.1	"Fructose-1 6-bisphosphatase class 1 (AHRD V1 **** D3PE46_DEFD
3.988	0.029828	Solyc01g105100.2.1	Endoplasmic reticulum-Golgi intermediate compartment protein 3 (AHRD V1 ***- C0H9D0_SALSA)
3.988	0.0237	Solyc06g065990.1.1	GO:0045263 "ATP synthase subunit b&apos (AHRD V1 ***-
3.987	0.004284	Solyc01g008550.2.1	Cinnamoyl CoA reductase-like protein (AHRD V1 ***- B9HNY0_POPTR);
3.987	0.01189	Solyc09g090330.2.1	"Harpin binding protein 1 (AHRD V1 **-- Q5QJB4_SOLLC)
3.986	0.005035	Solyc01g102300.2.1	BHLH transcription factor (AHRD V1 *-** B6TXR4_MAIZE)
3.985	0.002663	Solyc10g080740.1.1	Smg-7 homolog nonsense mediated mRNA decay factor (C. elegans) (Fragment) (AHRD V1 *--- B1ALB4_HUMAN)
3.983	0.008964	Solyc04g007820.2.1	"Major latex-like protein (AHRD V1 **-- Q9AXU0_PRUPE)
3.981	0.005445	Solyc12g095910.1.1	Vacuolar processing enzyme-3 (AHRD V1 **-- Q852T0_TOBAC)
3.981	0.003252	Solyc04g012120.2.1	"14-3-3 protein beta/alpha-1 (AHRD V1 **-- 143B1_ONCMY)
3.979	0.00674	Solyc01g103370.2.1	"Ras-related protein Rab-1A (AHRD V1 ***- C0HBJ4_SALSA)
3.978	0.003739	Solyc01g098780.2.1	Signal peptidase complex subunit 3 (AHRD V1 **** B0XD98_CULQU)
3.977	0.006069	Solyc04g074480.2.1	"3-deoxy-7-phosphoheptulonate synthase (Phospho-2-dehydro-3-de
3.974	0.002718	Solyc12g095960.1.1	GO:0051010 "Insulin-like growth factor 2 mRNA-binding
3.971	0.002348	Solyc03g044150.2.1	"Subtilisin-like protease (AHRD V1 ***- A9XG40_TOBAC)
3.971	0.002055	Solyc06g049050.2.1	"Expansin (AHRD V1 ***- O82625_SOLLC)
3.965	0.002348	Solyc02g077410.2.1	heat-and acid-stable phosphoprotein (AHRD V1 *-*- B5X267_SALSA);
3.964	0.003795	Solyc09g066490.2.1	Adaptin ear-binding coat-associated protein 2 (AHRD V1 **** B4FAZ6_MAIZE)
3.956	0.002739	Solyc02g081120.2.1	Knotted-1-like homeobox protein H1 (AHRD V1 ***- Q8GUS6_TOBAC)
3.956	0.002673	Solyc06g066030.2.1	Os02g0200800 protein (Fragment) (AHRD V1 *-*- Q0E303_ORYSJ)
3.955	0.003769	Solyc02g071210.2.1	Cold acclimation protein COR413-like (AHRD V1 *-*- A6YDU6_LOLTE)
3.954	0.003111	Solyc05g023800.2.1	GTP-binding nuclear protein Ran-A1 (AHRD V1 **-- B3TM31_ELAGV)
3.945	0.002256	Solyc02g036350.2.1	1-aminocyclopropane-1-carboxylate oxidase (AHRD V1 ***- A4ZYQ6_SOLLC)
3.942	0.006761	Solyc04g015830.2.1	Actin-binding protein gelsolin (AHRD V1 **-* D8UJD7_VOLCA)
3.935	0.012114	Solyc11g007170.1.1	Vacuolar sorting protein 4b (AHRD V1 **-- B6TLN7_MAIZE)
3.934	0.002579	Solyc01g067740.2.1	"Superoxide dismutase (AHRD V1 **** B1Q475_CAPCH)
3.934	0.003111	Solyc12g062860.1.1	Universal stress protein family protein (AHRD V1 **-- D7M6L9_ARALY)
3.933	0.002376	Solyc10g007350.2.1	Multiprotein bridging factor 1 (AHRD V1 ***- Q9LL86_SOLTU)
3.927	0.006988	Solyc02g077670.2.1	"Chaperone protein dnaJ 2 (AHRD V1 ***- DNAJ2_ARATH)
3.922	0.009217	Solyc06g060490.2.1	"BZIP transcription factor family protein (AHRD V1 *-*- D7LF63
3.912	0.002729	Solyc10g048030.1.1	Major latex-like protein (AHRD V1 **-- B5THI3_PANGI)
3.911	0.002308	Solyc03g121310.2.1	"RWD domain-containing protein (AHRD V1 ***- Q38HU0_SOLTU)
3.911	0.003036	Solyc04g079180.2.1	Unknown Protein (AHRD V1)
3.909	0.003601	Solyc11g008270.1.1	"Genomic DNA chromosome 3 P1 clone MSJ11 (AHRD V1 **-- Q9LW02_
3.904	0.012597	Solyc09g010400.2.1	"Histone H2A (AHRD V1 ***- B9T4D3_RICCO)
3.903	0.019923	Solyc03g117430.2.1	Cobalamin synthesis protein P (AHRD V1 ***- D3M8Z8_9ACTO)
3.9	0.00925	Solyc09g065370.1.1	GO:0005515 "Unknown Protein (AHRD V1)"
3.898	0.003084	Solyc06g082600.2.1	"Ubiquitin-conjugating enzyme E2-like protein (AHRD V1 **** Q2
3.898	0.004923	Solyc00g082150.2.1	Kinesin light chain (AHRD V1 **-- B6SKU4_MAIZE)
3.872	0.00241	Solyc12g042900.1.1	GO:0005740 "Cytochrome c oxidase subunit Vb (AHRD V1
3.872	0.005223	Solyc03g119210.1.1	GO:0006869 "Lipid transfer protein (AHRD V1 ***- Q421
3.871	0.003158	Solyc02g087300.1.1	GO:0005515 "Protein transport SEC13-like protein (AHR
3.871	0.004252	Solyc04g058060.1.1	GO:0005515 "30S ribosomal protein S8P (AHRD V1 *-*- R
3.866	0.010581	Solyc03g097950.2.1	"50S ribosomal protein L29 (AHRD V1 ***- B6TS58_MAIZE)
3.852	0.005637	Solyc08g078070.2.1	"Ras-related protein Rab-1A (AHRD V1 ***- B6RB23_HALDI)
3.845	0.01157	Solyc01g007380.1.1	GO:0031361 "Apocytochrome f (AHRD V1 ***- D3WBH0_9AQU
3.845	0.002333	Solyc08g083360.2.1	"Ferredoxin (AHRD V1 *-*- D8FXV1_9CYAN)
3.844	0.004768	Solyc07g055250.2.1	Cell wall-associated hydrolase (AHRD V1 ---- Q04CK3_LACDB)
3.843	0.002311	Solyc04g082890.2.1	"BZIP transcription factor protein (AHRD V1 **** B2CM16_SOLCH)
3.842	0.004132	Solyc05g053470.2.1	chaperonin (AHRD V1 ***- D2LE93_RHOVA)
3.84	0.002761	Solyc12g055720.1.1	Receptor like kinase, RLK GO:0005515,GO:0006468 GO:0005515,GO:0006468
3.835	0.004178	Solyc09g082630.2.1	"Acireductone dioxygenase (AHRD V1 **** Q08G57_PLAMJ)
3.834	0.002711	Solyc01g079820.2.1	Redoxin domain protein (AHRD V1 **-- A1WHD5_VEREI)
3.833	0.002761	Solyc12g098850.1.1	Soluble diacylglycerol acyltransferase (AHRD V1 *-*- B9S020_RICCO)
3.83	0.007632	Solyc06g071870.2.1	"60S ribosomal protein L17 (AHRD V1 ***- D7KV33_ARALY)
3.83	0.033352	Solyc10g054440.1.1	Arginine decarboxylase (AHRD V1 **** Q5F307_SOLLC)
3.826	0.005918	Solyc06g076430.2.1	Serine/threonine-protein phosphatase (AHRD V1 **** Q9SPE2_MALDO)
3.825	0.007264	Solyc05g006580.2.1	Unknown Protein (AHRD V1)
3.823	0.006125	Solyc03g044000.1.1	Ribosomal protein L26 (AHRD V1 ***- A8HMG7_CHLRE)
3.816	0.008404	Solyc02g061840.2.1	"Nuclear SR-like RNA binding protein (AHRD V1 *--- A8JAT7_CHLR
3.81	0.004912	Solyc01g105970.2.1	"Magnesium-dependent phosphatase-1 family protein expressed (A
3.805	0.012676	Solyc11g069330.1.1	"Arabidopsis thaliana genomic DNA chromosome 5 P1 clone MOK16
3.803	0.003624	Solyc03g115940.2.1	"Dof zinc finger protein (AHRD V1 ***- C4B6D7_IPOBA)
3.801	0.005411	Solyc07g055200.2.1	"Kinase family protein (AHRD V1 ***- D7M6L5_ARALY)
3.8	0.003827	Solyc12g009140.1.1	Proteasome subunit alpha type (AHRD V1 ***- D2D307_GOSHI)
3.796	0.002715	Solyc11g005080.1.1	Protein tolB (AHRD V1 *-*- D5MJZ0_9BACT)
3.791	0.005756	Solyc11g066410.1.1	50S ribosomal protein L9 (AHRD V1 ***- B4FU53_MAIZE)
3.789	0.002805	Solyc03g082590.2.1	TBC1 domain family member 15 (AHRD V1 *--- Q6P4X9_XENTR)
3.785	0.005737	Solyc07g006640.2.1	"ADP-ribosylation factor 3 (AHRD V1 ***- B4FM64_MAIZE)
3.778	0.004192	Solyc12g038980.1.1	"50S ribosomal protein L7Ae (AHRD V1 *--- RL7A_NANEQ)
3.775	0.00271	Solyc01g098590.2.1	Phosphoglycerate mutase family protein (AHRD V1 ***- C1DZH2_9CHLO)
3.773	0.008184	Solyc11g069090.1.1	ATP-binding cassette protein (AHRD V1 ***- C0NDN3_AJECG)
3.772	0.004186	Solyc08g077980.2.1	"Bax inhibitor (AHRD V1 ***- Q6U1L7_SOLLC)
3.771	0.003158	Solyc01g021670.2.1	POT family domain containing protein expressed (AHRD V1 ***- D8L9H8_WHEAT)
3.76	0.013161	Solyc01g086920.2.1	LRR receptor-like serine/threonine-protein kinase, RLP GO:0005515 GO:0004675 GO:0004675,GO:0005515
3.747	0.004518	Solyc01g096810.2.1	"Ethylene insensitive 3 class transcription factor (AHRD V1 **
3.746	0.015854	Solyc04g005700.2.1	Major latex-like protein (AHRD V1 **-- B5THI3_PANGI)
3.741	0.003128	Solyc07g007120.2.1	Homeobox protein knotted-1-like 3 (AHRD V1 *-*- B6T3D1_MAIZE)
3.731	0.004769	Solyc05g053300.2.1	"Dihydrolipoyl dehydrogenase (AHRD V1 ***- Q8GT30_SOLLC)
3.721	0.00405	Solyc02g094130.2.1	Genomic DNA chromosome 5 P1 clone MJC20 (AHRD V1 *--- Q9FHX9_ARATH)
3.72	0.005458	Solyc04g074510.2.1	14-3-3 protein beta/alpha-B (AHRD V1 **-- 143BB_XENLA)
3.715	0.022257	Solyc06g005060.2.1	"Elongation factor 1-alpha (AHRD V1 ***- Q8H9C0_SOLTU)
3.714	0.002919	Solyc05g007560.2.1	"60S ribosomal protein L34 (AHRD V1 ***- B6UH15_MAIZE)
3.707	0.003494	Solyc04g076670.2.1	"TRAF type zinc finger domain containing 1 (AHRD V1 **-- B6T8M
3.704	0.003088	Solyc04g025650.2.1	"Monooxygenase FAD-binding (AHRD V1 **-- A1TC37_MYCVP)
3.699	0.003128	Solyc08g081470.2.1	Nitrilase-associated protein (AHRD V1 --*- B6SPJ4_MAIZE)
3.699	0.007264	Solyc05g054730.2.1	Cation diffusion facilitator 10 (AHRD V1 **-- Q84ND4_STYHA)
3.698	0.003196	Solyc03g080090.2.1	"NAC domain protein IPR003441 (AHRD V1 *-*- B9IDH0_POPTR)
3.697	0.010292	Solyc05g009910.2.1	"Coiled-coil domain-containing protein 94 (AHRD V1 ***- B6TAZ7
3.696	0.005184	Solyc09g007180.2.1	"Adenylate kinase (AHRD V1 **** B6SLP1_MAIZE)
3.695	0.004694	Solyc01g097770.2.1	"Serine/threonine protein kinase (AHRD V1 *-** D2V878_NAEGR)
3.695	0.005756	Solyc01g009780.2.1	LITAF-domain-containing protein (AHRD V1 ***- Q4U6G1_PEA)
3.693	0.003855	Solyc09g005580.2.1	"SelT-like protein (AHRD V1 ***- SELT_ARATH)
3.692	0.004938	Solyc02g091920.2.1	"Xyloglucan endotransglucosylase/hydrolase 2 (AHRD V1 **** Q2M
3.681	0.00334	Solyc02g077880.2.1	Auxin-repressed protein (AHRD V1 ***- Q6PXE1_9SOLN)
3.676	0.008878	Solyc03g120090.1.1	Pyridoxal biosynthesis lyase pdxS (AHRD V1 ***- Q2RMJ0_MOOTA)
3.672	0.003721	Solyc01g103410.2.1	Nucleic acid binding protein (AHRD V1 **-* B6T8Q7_MAIZE)
3.672	0.023989	Solyc08g082700.2.1	26S proteasome non-ATPase regulatory subunit 8 (AHRD V1 ***- B4FCY9_MAIZE)
3.669	0.005911	Solyc04g074550.2.1	"Cytochrome c oxidase subunit VIb (AHRD V1 *-*- B4R7T3_DROSI)
3.666	0.008801	Solyc06g074260.2.1	Genomic DNA chromosome 5 P1 clone MWD9 (AHRD V1 *-*- Q9FMQ8_ARATH)
3.665	0.004437	Solyc08g076970.2.1	Acetylornithine deacetylase or succinyl-diaminopimelate desuccinylase (AHRD V1 **-- D4MFM7_9ENTE)
3.663	0.004732	Solyc12g009250.1.1	chaperonin (AHRD V1 *-*- D1U6H2_9DELT)
3.66	0.002892	Solyc09g083020.1.1	GO:0005529 "Myrosinase-binding protein-like protein (
3.66	0.004448	Solyc08g076860.2.1	"Zinc-binding family protein (AHRD V1 **** D7MDD4_ARALY)
3.657	0.005637	Solyc01g111710.2.1	26S proteasome non-ATPase regulatory subunit 3 (AHRD V1 ***- B6TBG8_MAIZE)
3.655	0.004419	Solyc01g104740.2.1	Multiprotein bridging factor 1 (AHRD V1 ***- C8C4P8_WHEAT)
3.643	0.009321	Solyc02g078120.1.1	Eukaryotic translation initiation factor 3 subunit 7 (AHRD V1 ***- Q9FKV6_ARATH)
3.633	0.003287	Solyc06g076670.2.1	"Nuclear SR-like RNA binding protein (AHRD V1 *--- A8JAT7_CHLR
3.629	0.00478	Solyc01g096570.2.1	Exonuclease family protein expressed (AHRD V1 **-- Q2R3D7_ORYSJ)
3.622	0.014255	Solyc01g007220.2.1	NHL1 (Fragment) (AHRD V1 **-- B0LZM3_ARATH)
3.619	0.005658	Solyc12g088720.1.1	Polyadenylate-binding protein 2 (AHRD V1 ***- B6U4M0_MAIZE)
3.616	0.019672	Solyc01g090600.2.1	Chalcone synthase 3 protein (AHRD V1 ***- D5LQ17_BRARA)
3.61	0.003272	Solyc05g015640.2.1	Unknown Protein (AHRD V1)
3.609	0.003963	Solyc04g079200.2.1	"26S proteasome regulatory subunit (AHRD V1 **** A8HPA0_CHLRE)
3.606	0.004252	Solyc10g047130.1.1	RNA-binding protein RZ-1 (AHRD V1 **** D0V0M9_CAPAN)
3.6	0.004724	Solyc12g056780.1.1	GO:0051082,GO:0051087 "Prostaglandin E synthase 3 (AH
3.597	0.015112	Solyc02g069610.2.1	"Protein transport protein GOT1 (AHRD V1 **-- GOT1_YEAST)
3.594	0.00491	Solyc11g007200.1.1	GO:0030001 "Copper chaperone (AHRD V1 *-*- D3GC04_9RO
3.59	0.003432	Solyc04g010240.2.1	"60S ribosomal protein L35 (AHRD V1 ***- D7M7V2_ARALY)
3.585	0.011699	Solyc11g005600.1.1	GO:0003743 "Translation initiation factor 2B (AHRD V1
3.584	0.005899	Solyc08g079070.2.1	"Transaldolase (AHRD V1 **** D6N3G8_GOSHI)
3.583	0.003356	Solyc04g005480.1.1	Unknown Protein (AHRD V1)
3.579	0.007668	Solyc04g073990.2.1	Annexin (AHRD V1 ***- Q42657_CAPAN)
3.578	0.004401	Solyc10g086400.1.1	GO:0003676,GO:0000166 "THO complex subunit 4 (AHRD V1
3.568	0.010732	Solyc12g009960.1.1	Eukaryotic translation initiation factor 4 (AHRD V1 *-*- D8TN78_VOLCA)
3.568	0.00494	Solyc07g009380.2.1	Xyloglucan endotransglucosylase/hydrolase 2 (AHRD V1 **** Q8GTJ0_MALDO)
3.565	0.003297	Solyc10g005800.2.1	"CWC15 homolog (AHRD V1 ***- B9EL88_SALSA)
3.564	0.003494	Solyc11g069910.1.1	GO:0006350 "DNA-directed RNA polymerase II subunit J
3.561	0.005287	Solyc01g104840.2.1	RNA-binding protein RZ-1 (AHRD V1 **** D0V0M9_CAPAN)
3.556	0.004401	Solyc06g073460.2.1	"Glutathione peroxidase (AHRD V1 ***- Q7XZS6_SOLLC)
3.555	0.02075	Solyc06g083040.2.1	"Serine carboxypeptidase 1 (AHRD V1 ***- B6TDA5_MAIZE)
3.555	0.004691	Solyc10g011770.2.1	endopeptidase (AHRD V1 **-- B6TCN7_MAIZE)"
3.552	0.01246	Solyc05g055010.2.1	"RNA-binding protein (AHRD V1 **-- D3TPM8_GLOMM)
3.544	0.005637	Solyc05g053210.2.1	CBL-interacting protein kinase 1 (AHRD V1 **** A0MNI9_POPTR)
3.543	0.003371	Solyc02g069370.2.1	"Ras-related protein Rab-5C (AHRD V1 ***- C1C0G6_9MAXI)
3.541	0.00457	Solyc09g083380.2.1	"Histone H1 (AHRD V1 *-*- B6TC95_MAIZE)
3.532	0.003808	Solyc03g031600.2.1	"Peroxisomal membrane protein PMP22 (AHRD V1 ***- B6TFH7_MAIZE
3.529	0.005238	Solyc05g056540.2.1	"Alcohol dehydrogenase-like protein (AHRD V1 **** Q8LDF7_ARATH
3.524	0.00365	Solyc01g111660.2.1	Aquaporin-like protein (AHRD V1 ***- Q8W1A8_PETHY)
3.522	0.005144	Solyc09g065180.2.1	NAD-dependent epimerase/dehydratase (AHRD V1 **-- B7K7X4_CYAP7)
3.517	0.00517	Solyc04g081730.2.1	Unknown Protein (AHRD V1)
3.513	0.004048	Solyc07g049450.2.1	"Thioredoxin/protein disulfide isomerase (AHRD V1 **-* D3TLX2_
3.508	0.006288	Solyc03g007230.2.1	Protein phosphatase 2C (AHRD V1 ***- B1B5N6_PHYPA)
3.503	0.005029	Solyc12g015860.1.1	GO:0008299 "Farnesyl pyrophosphate synthase (AHRD V1
3.5	0.004333	Solyc11g005680.1.1	40S ribosomal protein S18 (AHRD V1 ***- B4G286_MAIZE)
3.499	0.006546	Solyc06g082100.2.1	Related to ATP dependent RNA helicase (AHRD V1 **-* Q6MV07_NEUCR)
3.494	0.004519	Solyc08g016670.2.1	Calcyclin-binding protein (AHRD V1 ***- B4FGY0_MAIZE)
3.488	0.009263	Solyc03g062680.2.1	Unknown Protein (AHRD V1); contains Interpro domain(s)
3.487	0.005814	Solyc01g096590.2.1	30S ribosomal protein S10 (AHRD V1 ***- RS10_CAMFF)
3.482	0.006237	Solyc09g057670.2.1	FK506-binding protein 2 (EC 5.2.1.8)(Peptidyl-prolyl cis-trans isomerase)(PPIase)(Rotamase) (AHRD V1 **-* C8VE36_EMENI)
3.475	0.004401	Solyc12g009930.1.1	GO:0008152 "UDP-glucuronosyltransferase 1-6 (AHRD V1
3.472	0.00419	Solyc02g021560.2.1	Heterogeneous nuclear ribonucleoprotein A3-like protein 2 (AHRD V1 **-- B6TV58_MAIZE)
3.469	0.005563	Solyc01g106680.2.1	Unknown Protein (AHRD V1)
3.469	0.003808	Solyc02g080590.2.1	"Autophagy-related protein 8 (AHRD V1 **-- C1EJ88_9CHLO)
3.468	0.009339	Solyc04g071780.2.1	Cytochrome P450 GO:0020037,GO:0055114 GO:0019825 GO:0019825,GO:0020037,GO:0055114
3.465	0.00518	Solyc10g011870.2.1	Reticulon family protein (AHRD V1 ***- B2WS91_9BRAS)
3.463	0.005622	Solyc05g009690.2.1	Predicted membrane protein (Fragment) (AHRD V1 **-- B9HJ03_POPTR)
3.461	0.009547	Solyc06g006000.2.1	Unknown Protein (AHRD V1)
3.46	0.00645	Solyc11g012790.1.1	"SEC14-like protein 1 (AHRD V1 **-- B6TAH4_MAIZE)
3.459	0.004151	Solyc12g096300.1.1	GO:0005840 "40S ribosomal protein S6 (AHRD V1 ***- B6
3.458	0.008269	Solyc06g073280.2.1	LL-diaminopimelate aminotransferase (AHRD V1 **** A8IW39_CHLRE)
3.451	0.005195	Solyc01g108910.2.1	COSII_At2g15890 (Fragment) (AHRD V1 *-*- C0KFD9_9SOLN)
3.448	0.003984	Solyc07g056500.2.1	Glutathione transferase (AHRD V1 **** O49821_CARPA)
3.444	0.006816	Solyc08g079240.2.1	Homology to unknown gene (AHRD V1 *-*- Q01GV2_OSTTA)
3.439	0.006134	Solyc10g077120.1.1	Photosystem II core complex proteins psbY (AHRD V1 *-*- B6SR26_MAIZE)
3.437	0.004284	Solyc01g102660.2.1	"Maleylacetoacetate isomerase / glutathione S-transferase (AHR
3.435	0.005014	Solyc08g006650.2.1	Transmembrane protein 85 (AHRD V1 **-- B2W047_PYRTR)
3.434	0.006849	Solyc10g080500.1.1	GO:0005515,GO:0005524 "Actin (AHRD V1 ***- B5M4V6_TOB
3.429	0.005763	Solyc03g032160.2.1	Ubiquilin-1 (AHRD V1 *--- B6T584_MAIZE)
3.428	0.004119	Solyc08g006090.2.1	"Peptidyl-prolyl cis-trans isomerase (AHRD V1 ***- Q9LPC7_ARAT
3.426	0.007864	Solyc12g044880.1.1	GO:0005515 "Beta-galactosidase (AHRD V1 ***- Q546T5_S
3.423	0.005223	Solyc06g064830.2.1	"WD-40 repeat protein (AHRD V1 **-- Q94IP9_SOLLC)
3.42	0.004747	Solyc09g009170.2.1	Serine/threonine protein phosphatase family protein (AHRD V1 **-* Q5LN54_SILPO)
3.413	0.004122	Solyc01g112280.2.1	"Succinyl-diaminopimelate desuccinylase (AHRD V1 **-- DAPE_MAG
3.407	0.033504	Solyc11g062190.1.1	Mitochondrial ADP/ATP carrier proteins (AHRD V1 ***- Q2UU95_ASPOR)
3.407	0.004892	Solyc04g078380.1.1	GO:0005515 "MFP1 attachment factor 1 (AHRD V1 **-- Q9
3.403	0.005774	Solyc06g076520.1.1	GO:0051082 "class I heat shock protein (AHRD V1 ***-
3.403	0.005993	Solyc09g072870.2.1	"50S ribosomal protein L14 (AHRD V1 ***- RL14_DEHE1)
3.403	0.006013	Solyc02g079400.2.1	"Nitric oxide synthase interacting protein (AHRD V1 ***- B6TCA
3.402	0.004119	Solyc02g084990.2.1	Mannan endo-1 4-beta-mannosidase (AHRD V1 ***- A8FDC6_BACP2)
3.402	0.009215	Solyc03g111630.2.1	Programmed cell death 4a (AHRD V1 *--- D3TLD2_GLOMM)
3.399	0.010055	Solyc03g007740.2.1	"Reticulon family protein (AHRD V1 ***- B2WS91_9BRAS)
3.396	0.004842	Solyc05g053940.2.1	Ras-related protein Rab-1A (AHRD V1 ***- B6RB23_HALDI)
3.394	0.020727	Solyc07g019460.2.1	Cytochrome P450 NADPH-reductase (AHRD V1 **** B3RFK3_PETHY)
3.393	0.004088	Solyc04g080290.2.1	CRAL/TRIO domain containing protein expressed (AHRD V1 **-- Q75GU9_ORYSJ)
3.391	0.004153	Solyc04g078820.2.1	Annexin (AHRD V1 ***- B3TLL7_ELAGV)
3.39	0.004284	Solyc09g011600.2.1	Glutathione S-transferase-like protein (AHRD V1 **** A8DUB0_SOLLC)
3.39	0.00405	Solyc03g116780.2.1	domain containing protein (AHRD V1 **-- B6TCB4_MAIZE)
3.388	0.00496	Solyc06g084020.2.1	Histone H1 (AHRD V1 *-*- O65820_SOLLC)
3.384	0.011552	Solyc07g025510.2.1	Senescence-associated protein 5 (AHRD V1 ***- O81655_HEMSP)
3.383	0.004743	Solyc08g006430.2.1	"N-methyl-L-tryptophan oxidase (AHRD V1 *-*- D2ZAX1_9ENTR)
3.377	0.004284	Solyc03g114470.2.1	Heat shock protein DnaJ domain protein (AHRD V1 **-- D7DZS3_NOSA0)
3.374	0.004881	Solyc02g081190.2.1	"1-aminocyclopropane-1-carboxylate oxidase (AHRD V1 ***- Q9ZWP
3.374	0.005756	Solyc03g118420.2.1	NF-X1 finger transcription factor (AHRD V1 **-- C5GCI1_AJEDR)
3.368	0.00494	Solyc09g020000.2.1	F21O3.28 protein (Fragment) (AHRD V1 *-*- Q9SRQ9_ARATH)
3.368	0.017343	Solyc04g082790.2.1	"Atp-dependent RNA helicase (AHRD V1 ***- B8BXP3_THAPS)
3.364	0.005144	Solyc06g072040.1.1	GO:0016563,GO:0003700 "Nuclear transcription factor Y
3.359	0.007697	Solyc06g084470.2.1	Unknown Protein (AHRD V1)
3.353	0.01152	Solyc02g083140.2.1	Ribonuclease E (AHRD V1 ***- B0LV36_SOLLC)
3.352	0.020411	Solyc11g010600.1.1	Os01g0841200 protein (Fragment) (AHRD V1 **-- Q0JHU9_ORYSJ)
3.348	0.007013	Solyc01g109770.2.1	RER1 protein (AHRD V1 ***- Q9P0H9_HUMAN)
3.347	0.004991	Solyc08g078820.2.1	"Autophagy-related protein 8 (AHRD V1 **-- C1EJ88_9CHLO)
3.344	0.005475	Solyc02g084360.2.1	"V-type proton ATPase 16 kDa proteolipid subunit c2 (AHRD V1 *
3.336	0.008001	Solyc03g031790.1.1	GO:0015157 "Magnesium transporter protein 1 (AHRD V1
3.333	0.006926	Solyc03g082580.2.1	"Glucosamine-6-phosphate deaminase (AHRD V1 ***- NAGB_ACHLI)
3.331	0.005954	Solyc10g039360.1.1	Unknown Protein (AHRD V1)
3.33	0.007903	Solyc01g097760.2.1	Ribosomal protein L7a (AHRD V1 ***- A8J567_CHLRE)
3.327	0.004991	Solyc11g009090.1.1	GO:0003676,GO:0000166 "Polyadenylate-binding protein
3.325	0.004843	Solyc10g018250.1.1	40S ribosomal protein S13 (AHRD V1 ***- D7LRU2_ARALY)
3.324	0.009791	Solyc05g052030.1.1	Ethylene responsive transcription factor 1a (AHRD V1 *-*- C0J9I9_9ROSA)
3.322	0.006741	Solyc12g014380.1.1	GO:0004347 "Glucose-6-phosphate isomerase 1"
3.321	0.00582	Solyc07g061800.2.1	Heme-binding protein 2 (AHRD V1 **** B6T0C0_MAIZE)
3.318	0.005411	Solyc07g043130.2.1	Os12g0117400 protein (Fragment) (AHRD V1 **-- Q0IQJ6_ORYSJ)
3.316	0.012114	Solyc08g061000.2.1	ATP-dependent RNA helicase (AHRD V1 ***- Q1HR75_AEDAE)
3.314	0.005465	Solyc10g084320.1.1	Subtilisin-like protease (AHRD V1 **-- O82777_SOLLC)
3.313	0.005629	Solyc07g064890.1.1	GO:0005515,GO:0003700 "Ethylene responsive transcript
3.303	0.012423	Solyc11g006360.1.1	"Genomic DNA chromosome 3 P1 clone MZE19 (AHRD V1 ***- Q9LHE6_
3.302	0.006824	Solyc09g083190.2.1	Genomic DNA chromosome 5 P1 clone MQD19 (AHRD V1 ***- Q9FG89_ARATH)
3.297	0.00496	Solyc08g076210.2.1	Secretory carrier-associated membrane protein 2 (AHRD V1 ***- B7X6S6_TOBAC)
3.292	0.005445	Solyc08g077240.2.1	Dehydration-responsive family protein (AHRD V1 ***- D7MCX6_ARALY)
3.292	0.01371	Solyc04g050920.2.1	"Os02g0504100 protein (Fragment) (AHRD V1 *-*- Q0E114_ORYSJ)"
3.29	0.006216	Solyc04g005160.1.1	6-phosphogluconate dehydrogenase decarboxylating (AHRD V1 **** B9N1W3_POPTR)
3.289	0.004921	Solyc02g069100.2.1	Cathepsin B (AHRD V1 ***- Q1HER6_NICBE)
3.287	0.007089	Solyc06g081980.1.1	GO:0046982,GO:0042803 "Pyridoxal biosynthesis lyase p
3.286	0.006389	Solyc07g066650.2.1	"DCN1-like protein 2 (AHRD V1 ***- B6TM27_MAIZE)
3.28	0.008686	Solyc01g087120.2.1	"F1-ATP synthase delta subunit (AHRD V1 ***- Q9SXX1_IPOBA)
3.28	0.006392	Solyc11g005330.1.1	Actin (AHRD V1 ***- Q7XZK0_GOSHI)
3.28	0.004905	Solyc06g067940.2.1	Cytochrome c oxidase subunit Vb (AHRD V1 ***- Q0KKQ8_PEA)
3.28	0.005034	Solyc01g100650.2.1	NHL repeat containing 2 (AHRD V1 *--- B2RR26_MOUSE)
3.278	0.005957	Solyc02g021470.2.1	"Cullin 4 (AHRD V1 ***- A9LK40_SOLLC)
3.278	0.007893	Solyc03g083030.2.1	Protein ABIL1 (AHRD V1 **-- B6TQN2_MAIZE)
3.277	0.011713	Solyc01g103930.2.1	"Transmembrane 9 superfamily protein member 3 (AHRD V1 ***- B6
3.275	0.004678	Solyc03g025340.1.1	C2 domain-containing protein (AHRD V1 *--- Q5DVL6_HORVD)
3.274	0.011427	Solyc03g098050.2.1	Calmodulin 3 protein (AHRD V1 **** Q712P2_CAPAN)
3.272	0.006028	Solyc04g072220.2.1	"NAC-domain transcription factor (AHRD V1 *-** D3WFN5_WHEAT)
3.271	0.006216	Solyc12g015880.1.1	Heat shock protein 90 (AHRD V1 ***- Q14TB1_TOBAC)
3.27	0.009574	Solyc10g079420.1.1	Calmodulin (AHRD V1 ***- B6TKX0_MAIZE)
3.266	0.018896	Solyc03g113270.2.1	Homeobox-leucine zipper-like protein (AHRD V1 *-*- Q3HRT1_PICGL)
3.265	0.005445	Solyc02g069450.2.1	Photosystem I reaction center subunit III (AHRD V1 ***- Q9XQB4_PHAAU)
3.263	0.004991	Solyc11g069700.1.1	GO:0005525,GO:0005737 "Elongation factor 1-alpha (AHR
3.26	0.004918	Solyc11g007020.1.1	GO:0016310,GO:0008299 "Diphosphomevalonate decarboxyl
3.259	0.006159	Solyc07g065650.2.1	"Transmembrane emp24 domain-containing protein 3 (AHRD V1 ***-
3.257	0.004672	Solyc08g080650.1.1	Osmotin-like protein (Fragment) (AHRD V1 **-- Q8S4L1_SOLNI)
3.257	0.007152	Solyc07g063100.2.1	Proton pump interactor 1 (AHRD V1 **-- D5L6G0_SOLTU)
3.257	0.005814	Solyc06g053310.2.1	"Hydroxyacylglutathione hydrolase 2 (AHRD V1 **** B6T9Z9_MAIZE
3.253	0.016205	Solyc02g061960.2.1	La related protein-like (AHRD V1 *--- Q5NBG8_ORYSJ)
3.244	0.004852	Solyc08g081760.1.1	Os11g0223400 protein (Fragment) (AHRD V1 *--- Q0ITS2_ORYSJ)
3.244	0.006258	Solyc03g120230.2.1	MAR-binding filament-like protein 1 (AHRD V1 **** MFP1_SOLLC)
3.237	0.005163	Solyc11g071790.1.1	"Unknown Protein (AHRD V1)"
3.235	0.011206	Solyc01g094950.2.1	Protein BPS1, chloroplastic (AHRD V1 **-- BPS1_ARATH)
3.235	0.005893	Solyc07g045300.2.1	Unknown Protein (AHRD V1)
3.233	0.005947	Solyc02g062620.2.1	Nuclear cap-binding protein subunit 2 (AHRD V1 **** B6SNB6_MAIZE)
3.228	0.005687	Solyc03g113240.2.1	Unknown Protein (AHRD V1);
3.22	0.005088	Solyc09g020130.2.1	60S ribosomal protein L5-1 (AHRD V1 ***- B6THG9_MAIZE)
3.22	0.004918	Solyc02g078380.2.1	Aluminum-induced protein-like protein (AHRD V1 **-- Q8S2R9_THEHA)
3.219	0.02232	Solyc03g007600.2.1	Pentatricopeptide repeat-containing protein At4g21190 (AHRD V1 ***- PP332_ARATH)
3.219	0.006472	Solyc04g055170.2.1	Annexin 2 (AHRD V1 ***- A9X4R2_BRAJU)
3.217	0.006708	Solyc08g066070.1.1	Exocyst complex protein EXO70 (AHRD V1 *--- EXO70_KLULA)
3.211	0.004881	Solyc02g068920.2.1	"Lecithin cholesterol acyltransferase (AHRD V1 ***- A2Q294_MED
3.208	0.005993	Solyc01g096580.2.1	30S ribosomal protein S10 (AHRD V1 ***- RS10_CAMFF)
3.208	0.00494	Solyc01g005250.2.1	Aspartate-semialdehyde dehydrogenase (AHRD V1 ***- B6TWW1_MAIZE)
3.207	0.006427	Solyc10g086580.1.1	Ribulose-1 5-bisphosphate carboxylase/oxygenase activase 1 (AHRD V1 ***- Q9AXG1_GOSHI)
3.205	0.006297	Solyc01g104700.2.1	"GTP-binding nuclear protein Ran-A1 (AHRD V1 **-- B3TM31_ELAGV
3.197	0.020925	Solyc02g081700.1.1	GO:0019773,GO:0005839 "Proteasome subunit alpha type
3.197	0.005629	Solyc02g068420.2.1	Glioma tumor suppressor candidate region gene 2 (AHRD V1 **-- Q6QLN3_RAT)
3.197	0.006651	Solyc08g081250.2.1	Aminopeptidase N (AHRD V1 ***- D5C0C8_NITHN)
3.192	0.007501	Solyc09g082060.2.1	"Cysteine synthase (AHRD V1 **** Q3LAG5_TOBAC)
3.19	0.033916	Solyc01g101060.2.1	S-adenosylmethionine synthase (AHRD V1 ***- B8LFH4_IPOBA)
3.19	0.00669	Solyc02g081980.2.1	Ectonucleoside triphosphate diphosphohydrolase 6 (AHRD V1 **-- Q6YHK4_CAVPO)
3.189	0.008117	Solyc03g121960.2.1	"Phospholipid diacylglycerol acyltransferase (AHRD V1 **** C5M
3.189	0.005197	Solyc02g081730.2.1	"Sterol-4-alpha-carboxylate 3-dehydrogenase decarboxylating (A
3.186	0.043278	Solyc12g015680.1.1	Ycf60 protein (AHRD V1 **-- Q8DJZ7_THEEB)
3.181	0.007264	Solyc07g005960.2.1	Serine carboxypeptidase K10B2.2 (AHRD V1 **** B6TM29_MAIZE)
3.178	0.005029	Solyc01g109520.2.1	"Ras-related protein Rab-7 (AHRD V1 ***- C1BJT6_OSMMO)
3.178	0.01794	Solyc03g062890.2.1	"Superoxide dismutase (AHRD V1 **** B6ZBR0_POPTN)
3.175	0.005661	Solyc10g085020.1.1	GO:0005874,GO:0043234 "Tubulin beta chain (AHRD V1 **
3.175	0.010358	Solyc01g079680.2.1	"Ran GTPase activating protein (Fragment) (AHRD V1 **-* A7M8K5
3.169	0.010357	Solyc09g031780.2.1	family transporter chloroplast inner envelope protein Tic110 (AHRD V1 **-- A4S0R7_OST
3.167	0.005656	Solyc10g086010.1.1	GO:0005840 "60S ribosomal protein L4/L1 (AHRD V1 ***-
3.165	0.005658	Solyc05g026540.2.1	Transmembrane protein 214 (AHRD V1 *-*- TM214_BOVIN)
3.159	0.013007	Solyc06g083810.2.1	"Glycolipid transfer protein domain-containing protein 1 (AHRD
3.154	0.005737	Solyc03g025270.2.1	"rRNA 2&apos-O-methyltransferase fibrillarin (AHRD V1 ***- B6J
3.152	0.010247	Solyc05g006320.2.1	domain family protein (AHRD V1 *--- B6TW56_MAIZE)
3.152	0.00693	Solyc09g083130.2.1	Peptidase S9 prolyl oligopeptidase active site domain protein (AHRD V1 *-*- D1C565_SPHTD)
3.148	0.005465	Solyc02g089870.1.1	GO:0008270 "RING finger protein 5 (AHRD V1 **-- B6TLS
3.146	0.015143	Solyc06g053230.2.1	Unknown Protein (AHRD V1)
3.144	0.005508	Solyc07g053260.2.1	14-3-3 protein sigma gamma zeta beta/alpha (AHRD V1 **-- Q16QZ7_AEDAE)
3.137	0.027181	Solyc11g011760.1.1	"Genomic DNA chromosome 5 P1 clone MQK4 (AHRD V1 ***- Q9FFC9_A
3.137	0.016146	Solyc02g080430.2.1	Mediator of RNA polymerase II transcription subunit 21 (AHRD V1 ***- MED21_CAEEL)
3.135	0.012813	Solyc04g076380.2.1	"Cytochrome P450 NADPH-reductase (AHRD V1 **** B3RFK2_PETHY)
3.135	0.009442	Solyc06g066600.2.1	Solute carrier family 2, facilitated glucose transporter member 3 (AHRD V1 **** GTR3_CANFA)
3.134	0.017065	Solyc06g072470.2.1	"50S ribosomal protein L29 (AHRD V1 ***- B6TS58_MAIZE)
3.132	0.008278	Solyc07g063340.2.1	COSII_At1g13380 (Fragment) (AHRD V1 *-*- C0KEY3_SOLDU)
3.131	0.006748	Solyc07g026960.2.1	"Xaa-Pro dipeptidase (AHRD V1 ***- B6TL64_MAIZE)
3.129	0.006099	Solyc06g073370.2.1	"40S ribosomal protein S18 (AHRD V1 ***- B4G286_MAIZE)
3.127	0.022445	Solyc09g011810.2.1	Fructose-1 6-bisphosphatase class 1 (AHRD V1 **** D0MHZ8_RHOM4)
3.127	0.00534	Solyc07g041490.1.1	Stress responsive alpha-beta barrel domain protein (AHRD V1 *-*- C7QRA6_CYAP0)
3.124	0.009329	Solyc01g009310.2.1	Sterol reductase (AHRD V1 **** A8IA67_CHLRE)
3.124	0.009677	Solyc03g034180.2.1	"14-3-3 protein beta/alpha-1 (AHRD V1 **-- 143B1_DANRE)
3.122	0.005465	Solyc01g079590.2.1	Transmembrane protein 205 (AHRD V1 ***- B9EN72_SALSA)
3.12	0.005623	Solyc04g009540.1.1	50S ribosomal protein L10 (AHRD V1 ***- B6SUJ0_MAIZE)
3.118	0.005876	Solyc01g008360.2.1	Pre-mRNA branch site p14-like protein (AHRD V1 **-- B6T0W0_MAIZE);
3.117	0.00964	Solyc07g053690.2.1	OB-fold nucleic acid binding domain containing protein (AHRD V1 ***- B6SHT0_MAIZE)
3.116	0.015633	Solyc09g074400.2.1	"WD repeat protein 39 (AHRD V1 **-- C1BHI0_ONCMY)
3.116	0.024944	Solyc06g053460.1.1	GO:0015631 "Prefoldin subunit 2 (AHRD V1 ***- B6TMM5_
3.114	0.018451	Solyc03g121360.1.1	GO:0042802,GO:0019904 "Charged multivesicular body pr
3.114	0.009082	Solyc08g081910.2.1	V-type proton ATPase subunit E (AHRD V1 **** D3PGM0_9MAXI)
3.114	0.011742	Solyc04g071560.2.1	"Thioredoxin y (AHRD V1 ***- B9GTH5_POPTR)
3.113	0.010357	Solyc01g109870.2.1	SEC14-like protein (AHRD V1 **-- Q9T026_ARATH)
3.113	0.011137	Solyc06g067920.2.1	"Cytochrome c1 (AHRD V1 **** Q9FKS5_ARATH)
3.109	0.012322	Solyc11g017070.1.1	"Eukaryotic translation initiation factor 3 subunit 2 (AHRD V1
3.107	0.015631	Solyc09g098150.2.1	Metacaspase 7 (AHRD V1 ***- D7KWG9_ARALY)
3.104	0.005797	Solyc10g079860.1.1	GO:0005515,GO:0008810 "Beta-1 3-glucanase (AHRD V1 **
3.104	0.006216	Solyc04g078600.2.1	Genomic DNA chromosome 5 P1 clone MCA23 (AHRD V1 **-- Q9FIJ8_ARATH)
3.101	0.013351	Solyc06g065560.1.1	GO:0009922 "Fatty acid elongase 3-ketoacyl-CoA syntha
3.093	0.006608	Solyc06g074210.2.1	decapping enzyme (AHRD V1 *-*- Q45NB8_XENLA)
3.093	0.005993	Solyc11g072270.1.1	GO:0005509 "Calmodulin (AHRD V1 ***- B6T4U8_MAIZE)
3.088	0.005763	Solyc02g071180.2.1	TA9 protein (Fragment) (AHRD V1 *--- Q70KT1_ORYSJ)
3.084	0.020245	Solyc03g115770.2.1	"Timing of CAB expression-like"
3.077	0.007535	Solyc02g014150.2.1	Photosystem II stability/assembly factor Ycf48-like protein (AHRD V1 **-- B0C6T3_ACAM1);
3.075	0.006653	Solyc09g010640.2.1	SLT1 protein (AHRD V1 **-- Q9FQY3_TOBAC) GO:0006508 GO:0006508
3.075	0.019654	Solyc04g082250.2.1	ATP-dependent zinc metalloprotease FTSH, chloroplastic (Fragment) (AHRD V1 ***- FTSH_CAPAN)
3.071	0.01882	Solyc08g067960.2.1	CHY zinc finger family protein expressed (AHRD V1 ***- Q337P2_ORYSJ)
3.071	0.007903	Solyc08g005020.2.1	Unknown Protein (AHRD V1)
3.069	0.014026	Solyc06g073800.2.1	"40S ribosomal protein S11 (AHRD V1 ***- D7MBM0_ARALY)
3.068	0.006435	Solyc06g008700.2.1	"tRNA (Guanine-N7-)-methyltransferase subunit Trm82 (AHRD V1 *
3.066	0.017309	Solyc09g011450.2.1	cDNA clone J075093E01 full insert sequence (AHRD V1 ***- B7F961_ORYSJ)
3.065	0.007087	Solyc12g098940.1.1	GO:0005840 "Ubiquitin (AHRD V1 ***- D3PHG3_9MAXI)
3.062	0.007959	Solyc05g013820.2.1	"Proteasome subunit beta type (AHRD V1 ***- D7LPH0_ARALY)
3.06	0.010552	Solyc01g096190.2.1	Calcium-transporting ATPase (AHRD V1 ***- A8NHF4_COPC7)
3.057	0.040509	Solyc01g110150.2.1	CM0216.450.nc protein (AHRD V1 *-*- B0BL92_LOTJA)
3.054	0.033703	Solyc04g008540.2.1	"Tobamovirus multiplication protein (Fragment) (AHRD V1 ***- B
3.053	0.024217	Solyc02g080130.2.1	"Chaperone dnaj-like protein (AHRD V1 ***- B7FX28_PHATR)
3.053	0.014656	Solyc02g079770.2.1	DAG protein (AHRD V1 ***- B6TYI4_MAIZE)
3.049	0.011015	Solyc12g088730.1.1	50S ribosomal protein L4 (AHRD V1 ***- Q8LE97_ARATH)
3.047	0.006824	Solyc01g111520.2.1	Synaptotagmin (AHRD V1 *--- B0W3L1_CULQU)
3.045	0.007017	Solyc06g083780.2.1	50S ribosomal protein L14 (AHRD V1 ***- RL14_DEHE1)
3.045	0.007264	Solyc07g032090.2.1	"Transcription initiation factor IIF subunit beta (AHRD V1 ***
3.045	0.005993	Solyc09g075200.2.1	"U1 small nuclear ribonucleoprotein A (AHRD V1 ***- Q16H40_AED
3.043	0.019673	Solyc03g095490.2.1	Receptor like kinase, RLK GO:0005515,GO:0006468 GO:0004674,GO:0005515 GO:0004674,GO:0005515,GO:0006468
3.042	0.006606	Solyc07g040990.2.1	"Protein phosphatase 2C (AHRD V1 ***- A5A6P8_WHEAT)
3.041	0.010661	Solyc01g097010.2.1	Nucleic acid binding protein (AHRD V1 **-* B6U2B4_MAIZE)
3.037	0.020461	Solyc09g006000.2.1	Fe-S-cluster oxidoreductase-like (AHRD V1 ***- D8LKL6_ECTSI);
3.036	0.031462	Solyc09g097780.2.1	Glycine-rich protein (AHRD V1 *-*- D2K2U2_TOBAC)
3.036	0.007499	Solyc07g043580.2.1	"BHLH transcription factor (AHRD V1 *-** B6TXR4_MAIZE)
3.036	0.007632	Solyc03g113220.2.1	"SPFH domain/band 7 family protein (AHRD V1 **-- D7VZN9_9FLAO)
3.032	0.006708	Solyc10g007870.2.1	Tumor-related protein (AHRD V1 ***- Q40447_9SOLA)
3.031	0.00654	Solyc06g053820.2.1	"30S ribosomal protein S19 (AHRD V1 *-*- RS19_SHEAM)
3.029	0.011432	Solyc05g056160.2.1	Proteasome subunit beta type (AHRD V1 ***- C6TLJ9_SOYBN)
3.027	0.010556	Solyc06g072080.2.1	Sumo activating enzyme 1b (AHRD V1 **** D7MQ99_ARALY)
3.026	0.006975	Solyc11g066720.1.1	Bifunctional polymyxin resistance arnA protein (AHRD V1 ***- B6TQB1_MAIZE)
3.025	0.007175	Solyc12g098330.1.1	GO:0003735,GO:0005515 "60S ribosomal protein L13a-lik
3.025	0.006124	Solyc09g083370.2.1	"30S ribosomal protein S19 (AHRD V1 *-*- RS19_MYCHJ)
3.023	0.010381	Solyc04g025160.2.1	"Arsenite ATPase transporter (Eurofung) (AHRD V1 **** C8VJ74_E
3.02	0.021303	Solyc10g083160.1.1	Oxidation resistance 1 (AHRD V1 *--- D3HIS6_HUMAN)
3.018	0.006389	Solyc04g014670.2.1	Short-chain dehydrogenase/reductase SDR (AHRD V1 **** C0BIG4_9BACT)
3.01	0.006748	Solyc03g025630.2.1	Tripeptidyl-peptidase 2 (AHRD V1 ***- TPP2_BOVIN)
3.009	0.013412	Solyc11g008280.1.1	GO:0006508 "Serine carboxypeptidase (AHRD V1 ***- Q9X
3.008	0.009216	Solyc03g025880.2.1	"Cleavage and polyadenylation specificity factor subunit 5 (AH
3.001	0.014343	Solyc03g025850.2.1	"Remorin 1 (AHRD V1 ***- Q9XEX8_SOLLC)
2.999	0.007264	Solyc02g084920.2.1	"Proteasome subunit beta type (AHRD V1 ***- C6SY64_SOYBN)
2.999	0.014833	Solyc01g103110.2.1	Unknown Protein (AHRD V1);
2.998	0.018183	Solyc04g078680.2.1	RING-finger protein-like (AHRD V1 *-*- Q5QLR6_ORYSJ)
2.995	0.016765	Solyc07g055540.2.1	"Cytochrome P450"
2.994	0.006288	Solyc12g006700.1.1	Os07g0419800 protein (Fragment) (AHRD V1 *--- Q0D6Y1_ORYSJ)
2.994	0.0153	Solyc01g006510.2.1	L-threonine 3-dehydrogenase (AHRD V1 ***- TDH_ANADF)
2.994	0.008967	Solyc01g088480.2.1	Adenylate kinase (AHRD V1 ***- Q9XHP7_CERRI)
2.993	0.0098	Solyc04g064530.1.1	Unknown Protein (AHRD V1)
2.993	0.015204	Solyc07g007650.1.1	"Translocase of chloroplast 90, chloroplastic (AHRD V1 ***- TO
2.992	0.011269	Solyc02g062240.2.1	"Small nuclear ribonucleoprotein Sm D3 (AHRD V1 ***- B6UDW2_MA
2.988	0.014404	Solyc04g025300.2.1	Protein SUPPRESSOR OF GENE SILENCING 3 (AHRD V1 ***-
2.983	0.010556	Solyc02g083500.2.1	"Genomic DNA chromosome 5 TAC clone K2A18 (AHRD V1 ***- Q9FKX3
2.982	0.006736	Solyc11g067010.1.1	GO:0005634 "BUD31 homolog (AHRD V1 **-- C1BSC6_9MAXI)
2.98	0.014883	Solyc03g114000.2.1	"LIM domain protein (AHRD V1 **-- Q306K1_BRANA)
2.979	0.009687	Solyc01g107750.2.1	Phosphatase and tensin-like A (AHRD V1 *--- C5IX04_APIME)
2.978	0.00882	Solyc10g083650.1.1	GO:0016491,GO:0045454 "Peroxiredoxin ahpC/TSA family
2.976	0.018357	Solyc01g112350.2.1	Sec7 guanine nucleotide exchange factor (AHRD V1 *--* B0CY77_LACBS)
2.975	0.007623	Solyc12g011010.1.1	"Meiosis 5 (AHRD V1 *-*- B6T5X0_MAIZE)"
2.974	0.007152	Solyc10g018600.1.1	GO:0005289 "Amino acid transporter (AHRD V1 **** B7GL
2.969	0.013248	Solyc05g056270.2.1	Isocitrate lyase (AHRD V1 *-*- Q2TWG5_ASPOR)
2.965	0.012929	Solyc02g079500.2.1	"Peroxidase (AHRD V1 **** Q50LG4_TOBAC)
2.965	0.007976	Solyc01g095150.2.1	Late embryogenesis abundant protein (Fragment) (AHRD V1 **-- B7TGE2_PINSY)
2.965	0.009937	Solyc11g006500.1.1	Charged multivesicular body protein 5 (AHRD V1 **-- B6TYU1_MAIZE)
2.962	0.006821	Solyc12g007000.1.1	POT family domain containing protein expressed (AHRD V1 *-*- D8L9H8_WHEAT)
2.961	0.016511	Solyc05g006520.2.1	"Pyruvate dehydrogenase E1 component alpha subunit (AHRD V1 **
2.954	0.012423	Solyc07g066080.2.1	"Ubiquitin-conjugating enzyme E2 10 (AHRD V1 **** UBC10_ARATH)
2.951	0.012838	Solyc10g047220.1.1	Genomic DNA chromosome 5 P1 clone MHJ24 (AHRD V1 ***- Q9FMI4_ARATH)
2.95	0.013877	Solyc02g091900.2.1	"Cysteine desulfurase (AHRD V1 **** B6T4S0_MAIZE)
2.942	0.01504	Solyc01g100520.2.1	ATP-dependent Clp protease proteolytic subunit (AHRD V1 ***- Q93YH0_SOLLC)
2.936	0.01169	Solyc05g054320.2.1	"Epoxide hydrolase (AHRD V1 **** Q41413_SOLTU)
2.934	0.013992	Solyc07g063270.2.1	Nucleolar GTP-binding protein 2 (AHRD V1 **** B6TMG1_MAIZE)
2.931	0.010247	Solyc01g095990.2.1	Phosphatidylinositol kinase family-like protein (Fragment) (AHRD V1 *--- C3SA88_BRADI)
2.929	0.036723	Solyc12g010060.1.1	Eukaryotic translation initiation factor 5A (AHRD V1 ***- Q207T7_GYMCO)
2.925	0.007076	Solyc03g031860.2.1	Phytoene synthase 1 GO:0009058,GO:0016765 GO:0016767,GO:0046905 GO:0009058,GO:0016765,GO:0016767,GO:0046905
2.924	0.013161	Solyc03g019950.2.1	DNA chromosome 5 P1 clone MAC12 (AHRD V1 **-- Q9FFX3_ARATH)
2.922	0.007623	Solyc10g008340.2.1	Os05g0169400 protein (Fragment) (AHRD V1 *-*- Q0DKE7_ORYSJ)
2.92	0.011716	Solyc11g018580.1.1	Long-chain-fatty-acid--CoA ligase 4 (AHRD V1 ***- C0HA93_SALSA)
2.92	0.011107	Solyc06g007800.2.1	"Mitochondrial import inner membrane translocase subunit Tim17
2.918	0.010266	Solyc10g011660.2.1	GH3 family protein (AHRD V1 ***- B9GQG9_POPTR)
2.918	0.017548	Solyc06g065470.2.1	"RNA-binding protein 8A (AHRD V1 *--* B6TR37_MAIZE)
2.916	0.007849	Solyc03g119690.1.1	Aspartic proteinase nepenthesin-1 (AHRD V1 **-- C0JAA3_9ORYZ)
2.913	0.010219	Solyc05g050120.2.1	Malic enzyme (AHRD V1 ***- O04936_SOLLC)
2.91	0.008601	Solyc02g078570.2.1	Epoxide hydrolase 3 (AHRD V1 **** D8L7V9_PRUPE)
2.908	0.007959	Solyc07g007170.2.1	finger family protein (AHRD V1 ***- D7L4D8_ARALY)"
2.907	0.00813	Solyc04g081000.2.1	MADS box transcription factor (AHRD V1 ***- Q8L5F5_DAUCA)
2.903	0.010023	Solyc06g007340.2.1	Gamma-interferon-inducible lysosomal thiol reductase (AHRD V1 ***- B6U3P7_MAIZE)
2.901	0.012306	Solyc02g069460.2.1	Photosystem I reaction center subunit III (AHRD V1 ***- Q9XQB4_PHAAU)
2.901	0.012526	Solyc03g082890.2.1	"Pentapeptide repeat protein (AHRD V1 *-*- B4WQI2_9SYNE)
2.901	0.0102	Solyc02g081030.2.1	Uncharacterized membrane protein C2G11.09 (AHRD V1 **-- YAB9_SCHPO)
2.901	0.014786	Solyc05g026130.2.1	"AP-4 complex subunit sigma-1 (AHRD V1 ***- B4FTQ9_MAIZE)
2.9	0.009442	Solyc05g051290.2.1	High mobility group family (AHRD V1 *--- B9H3A3_POPTR)
2.9	0.009742	Solyc03g005730.2.1	3-isopropylmalate dehydratase large subunit 2 (AHRD V1 ***- B6U6T6_MAIZE)
2.898	0.01703	Solyc06g083680.2.1	"Photosystem I reaction center subunit IV A (AHRD V1 ***- B6TH
2.898	0.008001	Solyc03g005220.2.1	"Histone H2A (AHRD V1 ***- B9MZP0_POPTR)
2.896	0.022159	Solyc03g058860.2.1	3-dehydroquinate synthase (AHRD V1 ***- B4FYZ3_MAIZE);
2.892	0.033866	Solyc03g121330.2.1	"60S ribosomal protein L28 (AHRD V1 ***- B3TLS3_ELAGV)
2.892	0.01979	Solyc11g011220.1.1	"Unknown Protein (AHRD V1)"
2.89	0.008945	Solyc08g041890.2.1	"Importin alpha-1b subunit (AHRD V1 ***- B6T451_MAIZE)
2.89	0.02535	Solyc06g073260.2.1	NAD-dependent epimerase/dehydratase (AHRD V1 **-- C7QWY4_CYAP0)
2.889	0.025118	Solyc01g109170.2.1	Cold acclimation protein COR413-like (AHRD V1 ***- A6YDU6_LOLTE);
2.888	0.009442	Solyc01g068530.2.1	30S ribosomal protein S9 (AHRD V1 ***- C5JX04_AJEDS)
2.888	0.011594	Solyc05g005690.1.1	GO:0032183,GO:0003723 "30S ribosomal protein S9 (AHRD
2.887	0.026952	Solyc11g005670.1.1	Ubiquitin (AHRD V1 ***- Q2UZT4_MUSAC)
2.887	0.012593	Solyc12g009120.1.1	GO:0008190 "RING-box protein (AHRD V1 ***- Q2PYP4_ARA
2.884	0.009937	Solyc01g094480.2.1	Pre-mRNA-splicing factor prp46 (AHRD V1 **-- B6K7I2_SCHJY)
2.883	0.00862	Solyc05g010250.1.1	Acetyltransferase-like protein (AHRD V1 ***- Q31BX2_PROM9)
2.878	0.016007	Solyc02g090090.2.1	TPR domain containing protein (AHRD V1 ***- B6TDD9_MAIZE)
2.877	0.009584	Solyc03g120940.2.1	Os06g0483900 protein (Fragment) (AHRD V1 *-*- Q0DC52_ORYSJ)
2.876	0.007499	Solyc03g117870.2.1	4-coumarate CoA ligase (AHRD V1 **** Q0GZS1_9BORA)
2.876	0.008269	Solyc09g097830.2.1	TPR repeat protein (AHRD V1 **-- B0JK10_MICAN)
2.871	0.013551	Solyc06g076280.1.1	GRAS family transcription factor (AHRD V1 **-* B9HPF8_POPTR)
2.87	0.014473	Solyc11g072160.1.1	"Ubiquitin-associated /TS-N domain-containing protein (AHRD V1
2.865	0.008705	Solyc09g065200.2.1	Cyclin-dependent kinase (AHRD V1 **** A6YTD1_CUCME)
2.863	0.008035	Solyc03g045090.2.1	clone 001-043-A08 full insert sequence (AHRD V1 **-- B7E741_ORYSJ)"
2.861	0.012276	Solyc03g123900.2.1	Mannosyl-oligosaccharide 1 2-alpha-mannosidase (AHRD V1 **** Q9SEH8_SOYBN)
2.861	0.019345	Solyc10g005100.2.1	Salt stress root protein RS1 (AHRD V1 **-- SRS1_ORYSJ)
2.857	0.014515	Solyc03g005390.2.1	Magnesium transporter MRS2-I (AHRD V1 **** MRS2I_ORYSJ)
2.856	0.00862	Solyc04g076110.2.1	Genomic DNA chromosome 5 TAC clone K2I5 (AHRD V1 **-- Q9LTA1_ARATH)
2.854	0.010956	Solyc09g091740.2.1	60S ribosomal protein L13a-like protein (AHRD V1 ***- Q3HRW1_SOLTU)
2.853	0.038403	Solyc09g010100.2.1	30S ribosomal protein S11 (AHRD V1 ***- RS11_CAUSK)
2.851	0.015456	Solyc02g087130.2.1	"Phosphoglycerate mutase (AHRD V1 *--- C3JIP8_RHOER)
2.85	0.014267	Solyc02g071610.2.1	GDSL esterase/lipase At5g45670 (AHRD V1 ***- GDL82_ARATH)
2.846	0.010303	Solyc02g072300.2.1	"Glycogen synthase kinase (AHRD V1 **** C7AE95_SOYBN)
2.844	0.008469	Solyc08g069000.2.1	Zinc transport protein zntB (AHRD V1 *-*- C4U8N0_YERAL)
2.843	0.011086	Solyc06g051420.2.1	PHD finger family protein (AHRD V1 **-- D7LYZ0_ARALY)
2.842	0.022933	Solyc01g097460.2.1	Ribose-5-phosphate isomerase (AHRD V1 ***- A8IRQ1_CHLRE)
2.84	0.035502	Solyc02g082730.2.1	"Rab gdp-dissociation inhibitor (AHRD V1 **** Q17D49_AEDAE)
2.84	0.021545	Solyc01g097500.2.1	"Serine/threonine kinase (AHRD V1 *-** C4QNN2_SCHMA)
2.838	0.008404	Solyc01g091550.2.1	Thioesterase family protein (AHRD V1 **** B6UFY3_MAIZE)
2.838	0.007945	Solyc11g012730.1.1	GO:0048487 "Thioredoxin domain-containing protein 9 (
2.837	0.009004	Solyc01g097350.2.1	EF hand family protein (AHRD V1 ***- D7M6Y9_ARALY)"
2.834	0.008028	Solyc05g007970.2.1	Phytanoyl-CoA dioxygenase (AHRD V1 ***- B6R8S2_9RHOB)
2.831	0.034502	Solyc04g051830.2.1	Developmentally regulated GTP binding protein 1 (AHRD V1 **-* A8WE95_PEA)
2.828	0.029712	Solyc10g086040.1.1	GO:0001671 "Mitochondrial import inner membrane trans
2.827	0.018655	Solyc01g008930.2.1	Phycoerythrobilin ferredoxin oxidoreductase (AHRD V1 **** Q6E5A3_MAIZE)
2.822	0.009264	Solyc01g058280.2.1	Transmembrane protein 93 (AHRD V1 ***- B0WGS0_CULQU)
2.817	0.008156	Solyc03g118240.2.1	Magnesium-protoporphyrin ix methyltransferase (AHRD V1 **** D7MGJ7_ARALY)
2.812	0.009623	Solyc07g008770.2.1	Unknown Protein (AHRD V1)
2.811	0.009154	Solyc12g005080.1.1	Dihydrolipoyllysine-residue succinyltransferase component of 2-oxoglutarate dehydrogenase complex (AHRD V1 **** B6TFG5_MAIZE)
2.81	0.00842	Solyc03g120670.2.1	"D-isomer specific 2-hydroxyacid dehydrogenase NAD-binding (AH
2.807	0.021709	Solyc02g091840.2.1	Receptor like kinase, RLK GO:0005515,GO:0006468 GO:0004675 GO:0004675,GO:0005515,GO:0006468
2.807	0.01855	Solyc08g074760.2.1	"Receptor like kinase, RLK"
2.804	0.016831	Solyc03g112650.2.1	Soul heme-binding family protein (AHRD V1 **** D7KEL8_ARALY)
2.802	0.044071	Solyc11g012140.1.1	Isoleucyl-tRNA synthetase (AHRD V1 ***- Q6PGU7_DANRE)
2.801	0.035555	Solyc11g011170.1.1	ATA15 protein (AHRD V1 **-- Q5K6K5_ARATH)
2.8	0.010907	Solyc04g054190.2.1	ABC-1 domain protein (AHRD V1 **-- D7E596_NOSA0)
2.799	0.01032	Solyc08g081180.2.1	Signal peptide peptidase (AHRD V1 **** Q9MA44_ARATH)
2.799	0.0102	Solyc01g110480.2.1	"BZIP transcription factor family protein expressed (AHRD V1 *
2.797	0.025234	Solyc03g098710.1.1	Kunitz-type proteinase inhibitor A4 (Fragment) (AHRD V1 **** C5IWR3_SOLBR)
2.793	0.012727	Solyc02g079880.2.1	Translation initiation factor-related (AHRD V1 ***- D3YBD7_TRIRP)
2.791	0.0215	Solyc06g084400.2.1	"Methyl binding domain protein (AHRD V1 **** A9PE20_POPTR)
2.785	0.027073	Solyc05g054640.2.1	"2-oxoglutarate dehydrogenase E1 component (AHRD V1 **** Q9FLH
2.784	0.037053	Solyc10g005530.2.1	Nuclear cap-binding protein subunit 1 (AHRD V1 *-** B0X1G0_CULQU)
2.782	0.032847	Solyc09g090940.2.1	Ras GTPase-activating protein-binding protein 2 (AHRD V1 *--- B5X4A8_SALSA)
2.782	0.027323	Solyc10g077050.1.1	Palmitoyltransferase erf2 (AHRD V1 ***- C1GFP3_PARBD)
2.778	0.013545	Solyc09g074460.1.1	RING finger protein 44 (AHRD V1 *--- RNF44_RAT)
2.778	0.015486	Solyc07g006830.2.1	"Calmodulin-binding protein (Fragment) (AHRD V1 *-** Q9M451_CI
2.777	0.01198	Solyc03g062940.2.1	"Peroxisomal targeting signal 2 receptor (AHRD V1 **-* Q93WU5_
2.777	0.009816	Solyc02g067750.2.1	Carbonic anhydrase (AHRD V1 ***- B1VK36_SOLLC)
2.777	0.013359	Solyc10g038120.1.1	GO:0005515 "Coatomer subunit delta (AHRD V1 ***- B6TD
2.772	0.011639	Solyc03g123370.2.1	(P)ppGpp synthetase I (GTP pyrophosphokinase) SpoT/RelA (AHRD V1 *--* Q2RHV7_MOOTA)
2.77	0.015253	Solyc08g041770.2.1	Os04g0226400 protein (Fragment) (AHRD V1 *-*- C7J118_ORYSJ)
2.763	0.021592	Solyc03g110910.2.1	"Histone acetyltransferase ELP3 family protein (AHRD V1 **-- Q
2.763	0.030402	Solyc08g015860.2.1	"Rab GDP dissociation inhibitor (AHRD V1 **** C0LSK7_NICBE)
2.758	0.012142	Solyc02g091960.2.1	Nuclear matrix constituent protein 2 (AHRD V1 ***- D2YZU6_APIGR)
2.753	0.035184	Solyc01g081010.2.1	Nucleolar GTP-binding protein (AHRD V1 **** A8I0Z4_CHLRE)
2.752	0.011594	Solyc03g032090.1.1	GO:0015187 "Amino acid transporter family protein (AH
2.751	0.042735	Solyc06g073600.2.1	Ubiquitin-associated /TS-N domain-containing protein (AHRD V1 ***- D7LFE2_ARALY)
2.75	0.012976	Solyc01g034020.2.1	Serine/threonine-protein phosphatase (AHRD V1 **** A5AT05_VITVI)
2.75	0.018386	Solyc06g059760.2.1	Transcriptional corepressor SEUSS (AHRD V1 **-- SEUSS_ARATH) GO:0003677,GO:0060090 GO:0003677,GO:0060090
2.749	0.009547	Solyc01g095410.2.1	Eukaryotic translation initiation factor 1A (AHRD V1 **** Q7Y1V3_ORYSJ)
2.747	0.011119	Solyc05g008900.2.1	"COSII_At1g13380 (Fragment) (AHRD V1 *-*- C0KEY4_DATIN)
2.747	0.019904	Solyc06g069890.2.1	Nucleosome assembly protein family (AHRD V1 **-- A9RDJ7_PHYPA)
2.746	0.011594	Solyc04g008520.2.1	"Outer envelope protein (AHRD V1 ***- Q4LDF9_PEA)"
2.745	0.01032	Solyc07g009140.2.1	26S proteasome non-ATPase regulatory subunit 6 (AHRD V1 ***- B4FVL1_MAIZE)
2.745	0.019061	Solyc01g010750.2.1	Stress responsive protein (AHRD V1 *--- B6STP1_MAIZE)
2.743	0.010842	Solyc09g090190.2.1	Dehydration-responsive protein-like (AHRD V1 **-- Q653G1_ORYSJ)
2.742	0.038015	Solyc09g075570.1.1	Binding protein (AHRD V1 ***- D7LGN5_ARALY)
2.74	0.014676	Solyc11g022470.1.1	GO:0045449 "MYB-CC type transfactor (AHRD V1 **-- Q3L
2.738	0.015149	Solyc10g050840.1.1	Peptidase S9 prolyl oligopeptidase active site domain protein (AHRD V1 **** B7K7L2_CYAP7)
2.735	0.016215	Solyc03g093680.2.1	"Mago nashi-like protein 2 (AHRD V1 ***- A5H9J2_9SOLA)
2.728	0.010178	Solyc07g053620.2.1	"Chaperone protein dnaJ (AHRD V1 *-*- DNAJ_THEAC)
2.724	0.016923	Solyc05g053540.2.1	"Dihydroxy-acid dehydratase (AHRD V1 **** A6C1E8_9PLAN)
2.722	0.011477	Solyc01g103400.2.1	Unknown Protein (AHRD V1)
2.721	0.011731	Solyc10g081720.1.1	Fasciclin-like arabinogalactan protein 14 (AHRD V1 ***- A9XTL9_GOSHI)
2.72	0.019302	Solyc07g063550.2.1	Arf-GAP with GTPase, ANK repeat and PH domain-containing protein 1 (AHRD V1 *--- AGAP1_XENLA)
2.72	0.028279	Solyc03g096910.2.1	"ADP-ribosylation factor (AHRD V1 ***- Q5FYS3_DAUCA)
2.72	0.035111	Solyc07g045540.2.1	Glucose-6-phosphate 1-dehydrogenase (AHRD V1 **** O65856_TOBAC)
2.716	0.012593	Solyc03g115650.2.1	"Eukaryotic translation initiation factor 5A (AHRD V1 **** D6N
2.713	0.021674	Solyc02g080800.2.1	"Deoxyhypusine synthase (AHRD V1 ***- Q5ZN61_9ASTE)
2.711	0.028244	Solyc08g081080.2.1	Oxidoreductase/ transition metal ion binding protein (AHRD V1 **-- D7MCM0_ARALY)
2.71	0.015484	Solyc03g031690.2.1	"DNA-directed RNA polymerases I II and III subunit RPABC3 (AHR
2.707	0.012018	Solyc12g006540.1.1	Signal peptidase complex catalytic subunit SEC11A (AHRD V1 ***- C1BS39_9MAXI)
2.706	0.010064	Solyc03g083970.2.1	IQ calmodulin-binding motif family protein (AHRD V1 **** B6TKK9_MAIZE) GO:0005516 GO:0005516
2.704	0.026857	Solyc05g054130.2.1	Calcium-binding protein 39 (AHRD V1 **-* B6U5L1_MAIZE)
2.703	0.014587	Solyc11g042610.1.1	GO:0005840,GO:0015935 "Ribosomal protein S5 (AHRD V1
2.702	0.009687	Solyc01g010180.2.1	Unknown Protein (AHRD V1)
2.701	0.020626	Solyc04g008740.2.1	Pyruvate kinase (AHRD V1 **** Q3S1N4_SOLTU)
2.7	0.011848	Solyc11g071260.1.1	GO:0043687 "Ubiquitin-conjugating enzyme E2 (AHRD V1
2.693	0.018228	Solyc02g082060.1.1	"PPPDE peptidase domain-containing protein 1 (AHRD V1 *--- PPD
2.688	0.031384	Solyc01g079870.2.1	Nuclear transcription factor Y subunit C-2 (AHRD V1 *-** B4FLF9_MAIZE)
2.688	0.019411	Solyc10g055200.1.1	Disease resistance response (AHRD V1 ***- D7KM73_ARALY)
2.688	0.010845	Solyc05g013220.2.1	Fatty acid elongase 3-ketoacyl-CoA synthase (AHRD V1 **** Q6DUV6_BRANA)
2.688	0.019505	Solyc05g056510.2.1	Mucin-like protein (AHRD V1 ***- Q8S2G4_ORYSJ)
2.684	0.042271	Solyc04g005680.2.1	"Ribosomal protein (AHRD V1 ***- B3TM27_ELAGV)
2.68	0.049943	Solyc09g090520.2.1	Heterogeneous nuclear ribonucleoprotein A3 (AHRD V1 *--- B6TGB9_MAIZE)
2.678	0.023418	Solyc03g031840.2.1	"Expansin (AHRD V1 ***- Q9ZP33_SOLLC)
2.677	0.011885	Solyc02g080880.2.1	"Aspartic proteinase (AHRD V1 **-* Q8L6A8_THECC)
2.67	0.013904	Solyc10g006390.2.1	Smad nuclear interacting protein 1 (AHRD V1 *--- B1ASC5_MOUSE)
2.667	0.012597	Solyc10g078550.1.1	Glutamate dehydrogenase (AHRD V1 **** Q8L6A0_TOBAC)
2.662	0.032238	Solyc01g100660.2.1	factor (AHRD V1 ***- D7L4N5_ARALY)"
2.656	0.037686	Solyc01g106780.2.1	Pyruvate kinase (AHRD V1 **** B9GIN5_POPTR)
2.648	0.011279	Solyc10g078450.1.1	"U6 snRNA-associated Sm-like protein LSm6 (AHRD V1 ***- C1C4E6
2.648	0.018157	Solyc04g080190.2.1	Pore protein of (OEP24) (AHRD V1 **-- O49929_PEA)
2.645	0.013615	Solyc02g022920.1.1	Ethylene-responsive nuclear protein (AHRD V1 ***- Q38MV1_SOLLC)
2.643	0.022513	Solyc06g073450.2.1	Os11g0282300 protein (Fragment) (AHRD V1 *-*- Q0ITA9_ORYSJ)
2.643	0.01298	Solyc06g073150.2.1	"COP9 signalosome complex subunit 5b (AHRD V1 ***- B4FUK9_MAIZ
2.643	0.018506	Solyc06g011280.2.1	Elongation factor 1-gamma (AHRD V1 ***- B7SDI2_ORYSJ)
2.641	0.011141	Solyc02g086670.2.1	"Glycogen synthase kinase (AHRD V1 **** C7AE95_SOYBN)
2.64	0.020757	Solyc09g065850.2.1	"Auxin responsive protein (AHRD V1 ***- D9IQE6_CATRO)
2.64	0.026159	Solyc08g022080.2.1	"Opaque 2 (Fragment) (AHRD V1 *-*- Q84YA1_ZEAMH)
2.64	0.045682	Solyc06g036430.2.1	"Reticulon family protein (AHRD V1 ***- B2WS91_9BRAS)
2.64	0.023369	Solyc02g086560.2.1	Cobalamin (Vitamin B12) biosynthesis CbiX protein (AHRD V1 *--- A6C9M5_9PLAN);
2.635	0.023821	Solyc08g078020.1.1	"Methionine rich arabinogalactan (AHRD V1 *-*- Q52QJ6_SOLLC)"
2.633	0.01398	Solyc06g050760.1.1	"Wound-induced protein 1 (AHRD V1 ***- WUN1_SOLTU)
2.631	0.017662	Solyc01g111090.2.1	"ER lumen protein retaining receptor family protein (AHRD V1 *
2.63	0.028157	Solyc05g015500.2.1	Zinc finger Ran-binding domain-containing protein 2 (AHRD V1 *-** ZRAB2_RAT)
2.63	0.027073	Solyc09g018790.2.1	Gamma hydroxybutyrate dehydrogenase-like protein (AHRD V1 **** Q84VC8_ORYSJ)
2.63	0.015286	Solyc02g085000.2.1	Genomic DNA chromosome 5 TAC clone K1F13 (AHRD V1 ***- Q9FJZ1_ARATH)
2.622	0.013171	Solyc03g098460.2.1	"Retinol dehydrogenase 12 (AHRD V1 **-* B5XB52_SALSA)
2.62	0.013248	Solyc02g087770.2.1	"Aldose-1-epimerase-like protein (AHRD V1 **** O48971_TOBAC)
2.62	0.038646	Solyc07g053490.2.1	Optic atrophy 3 protein homolog (AHRD V1 **-- OPA3_DANRE)
2.617	0.013722	Solyc02g082340.2.1	"RNA polymerase I-specific transcription initiation factor RRN
2.616	0.034498	Solyc10g075110.1.1	GO:0006869 "Non-specific lipid-transfer protein (AHRD
2.615	0.011087	Solyc04g082640.2.1	Unknown Protein (AHRD V1)
2.615	0.011796	Solyc02g088630.2.1	Glycosyltransferase (AHRD V1 ***- B9IK47_POPTR)
2.614	0.012873	Solyc10g076740.1.1	Isoamyl acetate-hydrolyzing esterase (AHRD V1 **-- B6T5T9_MAIZE)
2.613	0.033112	Solyc04g078390.1.1	F-box protein (AHRD V1 *-*- A3RJX0_GOSHI)
2.61	0.011008	Solyc09g010520.2.1	"ADP-ribosylation factor GTPase activating protein 1 (AHRD V1
2.608	0.047968	Solyc01g080240.2.1	Mitogen-activated protein kinase 16 (AHRD V1 **** D7LYJ6_ARALY)
2.607	0.012797	Solyc02g069820.2.1	UPF0459 protein C19orf50 homolog (AHRD V1 ***- CS050_DANRE)
2.606	0.013591	Solyc07g062880.2.1	"Yippee zinc-binding-like protein (AHRD V1 **** C1FDK9_9CHLO)
2.599	0.028566	Solyc08g061970.2.1	"Spermidine synthase (AHRD V1 **** A4RYD8_OSTLU)
2.599	0.021658	Solyc09g074940.1.1	Translocase of chloroplast 90, chloroplastic (AHRD V1 *-*- TOC90_ARATH)
2.598	0.024598	Solyc04g082020.2.1	DNL zinc finger family protein (AHRD V1 **-- B6TGI7_MAIZE)
2.598	0.015282	Solyc11g011930.1.1	GO:0055114 "Isocitrate dehydrogenase (AHRD V1 ***- D2
2.597	0.043173	Solyc06g071330.2.1	Nucleobase ascorbate transporter (AHRD V1 **-* B9I369_POPTR)
2.593	0.015683	Solyc09g009300.2.1	"Receptor like kinase, RLK"
2.593	0.01855	Solyc12g099310.1.1	Ubiquitin-conjugating enzyme 31 (AHRD V1 ***- D7L699_ARALY)
2.588	0.013878	Solyc01g110290.2.1	Squalene synthase (AHRD V1 ***- D0VFU8_SOLLC)
2.587	0.01751	Solyc09g055940.2.1	"Bile acid sodium symporter family protein (AHRD V1 **** D7L6U
2.585	0.045705	Solyc05g013630.1.1	Unknown protein (Fragment) (AHRD V1 ***- Q43520_SOLLC)
2.585	0.02609	Solyc01g097520.2.1	Annexin 11 (AHRD V1 ***- D6QX28_SOYBN)
2.58	0.016409	Solyc08g075960.2.1	Mps one binder kinase activator-like 1A (AHRD V1 **** B6U9F2_MAIZE)
2.579	0.014498	Solyc03g119090.2.1	WD repeat-containing protein 1 (AHRD V1 ***- B5X1Z0_SALSA)
2.574	0.015149	Solyc05g006330.1.1	Unknown Protein (AHRD V1)
2.573	0.013125	Solyc10g011740.2.1	"Ubiquitin-conjugating enzyme E2 8 (AHRD V1 **** UBC8_ARATH)
2.573	0.033573	Solyc01g095170.2.1	Harpin-induced protein (AHRD V1 ***- B6SP51_MAIZE)
2.569	0.018552	Solyc07g041900.2.1	Cathepsin L-like cysteine proteinase (AHRD V1 **** A7LJ78_DERVA)
2.566	0.024241	Solyc04g014720.2.1	"60S ribosomal protein L6 (AHRD V1 ***- B9RHH3_RICCO)
2.564	0.014309	Solyc05g052780.2.1	LIM domain protein (AHRD V1 **-- Q8VWW1_GOSHI)
2.563	0.025118	Solyc10g055240.1.1	Phosphatidylinositol-specific phospholipase c (AHRD V1 *-*- B9UY71_LISMO)
2.562	0.034539	Solyc06g035720.2.1	BCL-2 binding anthanogene-1 (AHRD V1 **** B4FV61_MAIZE)
2.562	0.012326	Solyc02g090420.2.1	"50S ribosomal protein L25 (AHRD V1 ***- Q0EYU4_9PROT)
2.561	0.019782	Solyc05g015420.2.1	MYND finger family protein expressed (AHRD V1 ***- Q2R448_ORYSJ)
2.561	0.015854	Solyc06g053590.2.1	Unknown Protein (AHRD V1)
2.56	0.023969	Solyc03g112900.2.1	"Iron-sulfur cluster assembly scaffold protein IscU (AHRD V1 *
2.559	0.037732	Solyc06g062510.2.1	Charged multivesicular body protein 1b (AHRD V1 ***- B6T9W6_MAIZE)
2.559	0.012929	Solyc11g008740.1.1	Double-strand-break repair protein rad21 (AHRD V1 *-*- D0NDK6_PHYIN)
2.559	0.012027	Solyc09g010120.2.1	Unknown Protein (AHRD V1)
2.559	0.032224	Solyc01g108150.2.1	Oxidoreductase zinc-binding dehydrogenase family protein (AHRD V1 *--- Q22RF9_TETTH)
2.554	0.023978	Solyc02g082200.2.1	"Glutaredoxin (AHRD V1 ***- A9LC71_PTEVI)
2.554	0.018426	Solyc01g111120.2.1	"Triosephosphate isomerase (AHRD V1 **** D6N3G7_GOSHI)
2.552	0.012628	Solyc09g014760.2.1	Chlorophyll synthase (AHRD V1 **** C3W4Q2_TOBAC)
2.55	0.012375	Solyc05g006650.2.1	"Transcription factor (AHRD V1 **** D6MKM4_9ASPA)
2.55	0.031493	Solyc08g077440.2.1	ATP-dependent protease La (AHRD V1 **** A7HC55_ANADF)
2.548	0.012701	Solyc01g006800.2.1	Methionine aminopeptidase (AHRD V1 ***- B9ST99_RICCO);
2.547	0.018781	Solyc04g072460.2.1	"BZIP transcription factor (AHRD V1 **** A7Y1S1_BRAJU)
2.545	0.020016	Solyc12g099030.1.1	GO:0005840 "Ubiquitin (AHRD V1 ***- D3PHG3_9MAXI)
2.544	0.031477	Solyc03g113990.2.1	conserved protein (AHRD V1 **-- Q0IAV1_SYNS3)
2.542	0.016326	Solyc06g083300.2.1	Ras GTPase-activating protein-binding protein 2 (AHRD V1 *--- B5X4A8_SALSA)
2.538	0.021288	Solyc03g117320.2.1	"50S ribosomal protein L3-2 (AHRD V1 ***- B6TFD9_MAIZE)
2.536	0.014577	Solyc03g111850.2.1	Indole-3-glycerol phosphate synthase-like (AHRD V1 **** C8TFG9_ORYSI)
2.534	0.015367	Solyc10g005180.2.1	DNA chromosome 5 TAC clone K15C23 (AHRD V1 **-- Q9LU01_ARATH)"
2.529	0.030223	Solyc07g053650.2.1	26S proteasome regulatory subunit (AHRD V1 ***- A8J3A4_CHLRE)
2.529	0.013353	Solyc08g076360.2.1	"Gamma-tocopherol methyltransferase (AHRD V1 **** Q1PBH9_SOLLC
2.527	0.014331	Solyc02g070650.2.1	60S ribosomal protein L18a (AHRD V1 ***- D2D962_9ROSI)
2.526	0.013076	Solyc12g049390.1.1	Transmembrane protein (AHRD V1 **-- C0NFK1_AJECG)
2.526	0.02078	Solyc07g007510.2.1	"Adenylate cyclase (AHRD V1 ***- D7LB43_ARALY)
2.525	0.036048	Solyc07g009490.2.1	"Ethanolamine-phosphate cytidylyltransferase (AHRD V1 **** C5D
2.519	0.016034	Solyc02g082130.1.1	Unknown Protein (AHRD V1)
2.518	0.032079	Solyc02g084550.2.1	Chromosome 10 contig 1 DNA sequence (AHRD V1 ***- Q00ZV5_OSTTA) GO:0005874 GO:0005874
2.518	0.038792	Solyc01g104140.2.1	Phosphatidylinositol-4-phosphate 5-kinase family protein (AHRD V1 ***- D7KLK6_ARALY)
2.516	0.01274	Solyc01g103160.2.1	Pentatricopeptide repeat-containing protein (AHRD V1 *-*- D7LST4_ARALY)
2.515	0.029102	Solyc07g042620.2.1	Prefoldin subunit 1 (AHRD V1 ***- B6SIP7_MAIZE)
2.513	0.017829	Solyc07g039330.2.1	Histone-binding protein RBBP7 (AHRD V1 **-* B5X3G4_SALSA)
2.513	0.015683	Solyc08g076670.2.1	Transmembrane protein 41B (AHRD V1 **-- TM41B_HUMAN)
2.512	0.025733	Solyc10g006030.2.1	"30S ribosomal protein S10-like (AHRD V1 ***- A1YMX4_BRACM)
2.51	0.012822	Solyc02g080040.2.1	Receptor-like protein kinase (AHRD V1 **** C6ZRS0_SOYBN)
2.509	0.018114	Solyc09g065640.2.1	"Os11g0585900 protein (Fragment) (AHRD V1 **-- Q0IRY6_ORYSJ)
2.508	0.027868	Solyc07g054210.2.1	Protochlorophyllide reductase like protein (AHRD V1 ***- Q0WVW0_ARATH)
2.504	0.038587	Solyc10g039190.1.1	GO:0030515 "WD-repeat-containing protein (AHRD V1 **-
2.5	0.023087	Solyc07g061990.2.1	"Solanesyl diphosphate synthase (AHRD V1 ***- Q09IV6_SOLLC)
2.499	0.018183	Solyc01g057210.2.1	Pyruvate dehydrogenase kinase (AHRD V1 **** Q700B0_CICAR)
2.498	0.013878	Solyc06g048510.2.1	WD-repeat domain phosphoinositide-interacting protein 3 (AHRD V1 **-- B6SUF7_MAIZE)
2.497	0.016572	Solyc07g065980.2.1	"Alkaline alpha galactosidase I (AHRD V1 **-- Q3Y5A3_CUCSA)
2.497	0.018699	Solyc10g079190.1.1	Pre-mRNA splicing factor (AHRD V1 *-*- C4QX20_PICPG)
2.494	0.014229	Solyc06g059800.2.1	Protein-P-II uridylyltransferase (AHRD V1 *--- Q1YFE2_MOBAS)
2.492	0.014644	Solyc01g111510.2.1	"Ascorbate peroxidase (AHRD V1 **** Q8W4V7_CAPAN)
2.492	0.045556	Solyc09g092120.2.1	"Alkaline phytoceramidase (AHRD V1 ***- Q2HVG4_MEDTR)
2.491	0.027332	Solyc06g074120.2.1	BEL1-like homeodomain protein 1 (AHRD V1 **-- BLH1_ARATH)
2.491	0.018655	Solyc02g093360.2.1	"Ribosomal protein S6 kinase alpha-3 (AHRD V1 *-** KS6A3_HUMAN
2.49	0.014291	Solyc10g009220.2.1	Polyadenylate-binding protein 4-like (AHRD V1 *--* PAB4L_HUMAN)
2.49	0.013722	Solyc09g010860.2.1	Expansin (AHRD V1 ***- Q9ZP32_SOLLC)
2.489	0.013248	Solyc05g008440.1.1	"Unknown Protein (AHRD V1)"
2.488	0.014829	Solyc06g050570.1.1	"Prenylated rab acceptor family protein (AHRD V1 ***- D7LVC4_A
2.487	0.021071	Solyc06g071720.1.1	60S ribosomal protein L27A (AHRD V1 ***- B6VC54_VERFO)
2.487	0.014577	Solyc06g005790.2.1	"DNA-directed RNA polymerase II subunit (AHRD V1 **** A8N5F1_C
2.487	0.015633	Solyc02g068700.2.1	"Histidine triad (HIT) protein (AHRD V1 **-- Q2MGQ9_MEDTR)
2.485	0.016651	Solyc05g055230.1.1	GO:0003735,GO:0003723 "40S ribosomal protein S17-like
2.485	0.014352	Solyc07g017800.2.1	Unknown Protein (AHRD V1)
2.485	0.014904	Solyc08g078250.2.1	Palmitoyl-protein thioesterase 1 (AHRD V1 **** B4FKB8_MAIZE)
2.485	0.022235	Solyc02g081410.2.1	"Beta-catenin-like protein 1 (AHRD V1 **-- B6SWH5_MAIZE)
2.481	0.018562	Solyc04g071540.2.1	Sterol 3-beta-glucosyltransferase (AHRD V1 **** B6SKE1_MAIZE)
2.479	0.021996	Solyc02g021240.2.1	"Peptide transporter (AHRD V1 **-* A6YJX4_9MAGN)
2.477	0.029147	Solyc03g093690.2.1	"Peptide methionine sulfoxide reductase msrA (AHRD V1 **** D2B
2.476	0.035705	Solyc01g028810.2.1	chaperonin (AHRD V1 ***- B4VMY1_9CYAN)
2.475	0.01477	Solyc10g084400.1.1	"Glutathione S-transferase (AHRD V1 ***- Q76KW1_PEA)
2.474	0.014467	Solyc02g070770.2.1	"NAD-dependent epimerase/dehydratase (AHRD V1 **-- B8HW76_CYAP
2.474	0.033504	Solyc12g056530.1.1	Fructose-1 6-bisphosphatase class 1 (AHRD V1 ***- B8J024_DESDA)
2.473	0.022866	Solyc06g063230.2.1	Unknown Protein (AHRD V1)
2.472	0.016193	Solyc12g056230.1.1	Glutathione peroxidase (AHRD V1 ***- B9GKI5_POPTR)
2.472	0.028349	Solyc08g062450.1.1	GO:0051082 "class II heat shock protein (AHRD V1 ***-
2.47	0.016215	Solyc07g007370.2.1	NEDD8 ultimate buster 1 (AHRD V1 **-- C0HB30_SALSA)
2.467	0.016123	Solyc02g081880.2.1	Molybdenum cofactor sulfurase protein-like (AHRD V1 **-- Q653D7_ORYSJ)
2.466	0.030725	Solyc02g088700.2.1	Mitochondrial processing peptidase beta subunit (AHRD V1 ***- Q9AXQ2_CUCME)
2.462	0.025459	Solyc03g082660.2.1	facilitator superfamily domain containing protein 5 (AHRD V1 ***- B2W8V3_PYRTR)
2.457	0.021186	Solyc10g080160.1.1	GO:0005840 "30S ribosomal protein S9-like (AHRD V1 *-
2.456	0.022163	Solyc05g013240.2.1	Unknown Protein (AHRD V1)
2.456	0.018655	Solyc07g063240.2.1	DNA chromosome 3 P1 clone MJK13 (AHRD V1 **-- Q9LUQ3_ARATH)
2.455	0.016538	Solyc02g087760.2.1	"Calmodulin binding protein (AHRD V1 **-* B6U6R2_MAIZE)
2.454	0.016049	Solyc11g030720.1.1	Alcohol dehydrogenase zinc-containing (AHRD V1 **-* D6H3R6_STAAU)
2.453	0.01999	Solyc09g082760.2.1	Aspartic proteinase 2 (AHRD V1 **-* Q948P0_SOYBN)
2.453	0.019266	Solyc01g094040.2.1	Plastocyanin-like domain containing protein expressed (AHRD V1 **-- Q2QRP3_ORYSJ)
2.452	0.040963	Solyc06g069190.2.1	Nucellin-like aspartic protease (Fragment) (AHRD V1 **-- Q8L886_MAIZE)
2.452	0.039693	Solyc01g098500.2.1	Glucose transporter 8 (AHRD V1 ***- Q2KKJ3_SOLIN)
2.451	0.021052	Solyc01g079840.2.1	NEDD8-activating enzyme E1 catalytic subunit (AHRD V1 **** B6TJH0_MAIZE)
2.45	0.01504	Solyc06g084410.2.1	"Histidine phosphotransfer protein (AHRD V1 **** B9IG70_POPTR)
2.447	0.02676	Solyc02g082140.2.1	Unknown Protein (AHRD V1)
2.443	0.020164	Solyc09g075890.2.1	Pyrimidine 5&apos-nucleotidase (AHRD V1 **** B4WF69_9CAUL)
2.443	0.02147	Solyc11g007590.1.1	OTU domain-containing protein 4 (AHRD V1 *-*- OTUD4_HUMAN)
2.442	0.034141	Solyc03g113700.2.1	"CCR4-NOT transcription complex subunit 4 (AHRD V1 *--- Q498M7
2.438	0.02687	Solyc08g066730.2.1	"Methyltransferase like 3 (AHRD V1 *-** Q28H22_XENTR)
2.437	0.024963	Solyc01g009750.2.1	Unknown Protein (AHRD V1)
2.436	0.017885	Solyc05g024240.2.1	"Fatty acid oxidation complex subunit alpha (AHRD V1 ***- FADJ
2.435	0.01922	Solyc06g074030.1.1	CCR4-NOT transcription complex subunit 7 (AHRD V1 ***- B4FG48_MAIZE)
2.434	0.014498	Solyc04g079380.1.1	GO:0003735,GO:0005515 "30S ribosomal protein S14 (AHR
2.431	0.015345	Solyc02g087930.2.1	"60S ribosomal protein L34 (AHRD V1 ***- B6T098_MAIZE)
2.429	0.021891	Solyc11g010670.1.1	"Unknown Protein (AHRD V1)"
2.429	0.018451	Solyc06g031680.2.1	"FYVE zinc finger family protein (AHRD V1 ***- B4FKR4_MAIZE)
2.428	0.033788	Solyc02g091510.2.1	GDP-L-galactose phosphorylase 2 GO:0005515 GO:0005515
2.428	0.04186	Solyc07g062140.2.1	Alpha alpha-trehalose-phosphate synthase (AHRD V1 **** D0NRZ0_PHYIN)
2.427	0.030088	Solyc11g010470.1.1	GO:0019904 "14-3-3 protein beta/alpha (AHRD V1 **-- 1
2.427	0.023971	Solyc11g006680.1.1	Pentatricopeptide repeat-containing protein (AHRD V1 ***- D7LY59_ARALY)
2.427	0.020546	Solyc11g072690.1.1	GO:0008152,GO:0009058,GO:0005737 "2-dehydro-3-deoxyph
2.427	0.026695	Solyc05g026050.2.1	"Charged multivesicular body protein 4b (AHRD V1 ***- B6UES0_M
2.426	0.024661	Solyc02g067390.2.1	"RNA recognition motif containing protein (AHRD V1 **-- B6T581
2.421	0.045229	Solyc03g115360.2.1	40S ribosomal protein S19-like (AHRD V1 ***- Q2VCJ6_SOLTU)
2.421	0.036569	Solyc11g071620.1.1	Aldehyde oxidase (AHRD V1 ***- Q9FV25_SOLLC)
2.42	0.015643	Solyc02g076860.2.1	Pollen allergen Phl p 11 (AHRD V1 ***- B6TNI5_MAIZE)
2.418	0.018183	Solyc10g047210.1.1	"Unknown Protein (AHRD V1)
2.416	0.014928	Solyc02g079930.2.1	"Phosphosulfolactate synthase (AHRD V1 ***- Q1ASZ8_RUBXD)
2.413	0.031227	Solyc03g116570.2.1	YuxK (AHRD V1 **-- B4AHQ1_BACPU); contains Interpro domain(s)
2.412	0.025779	Solyc07g054730.1.1	"Wound-responsive protein-related (AHRD V1 ***- A8IXM2_BRACM)"
2.412	0.019763	Solyc07g054490.2.1	"Secretory carrier membrane protein (AHRD V1 ***- B3TLU6_ELAGV
2.411	0.019137	Solyc04g011510.2.1	"Triosephosphate isomerase (AHRD V1 **** Q38JI4_SOLTU)
2.407	0.016675	Solyc03g121590.2.1	Protein SEY1 (AHRD V1 ***- B6U4D9_MAIZE)
2.404	0.02013	Solyc03g097910.2.1	"Dihydroorotate dehydrogenase family protein (AHRD V1 **** D7L
2.4	0.024217	Solyc03g079850.2.1	cyclase (AHRD V1 **-- A0FK54_SOLLC)
2.399	0.048988	Solyc03g111690.2.1	Pectate lyase (AHRD V1 **** Q2Z1Y4_PRUMU)
2.396	0.015707	Solyc06g066060.2.1	ATP-dependent RNA helicase (AHRD V1 **** Q1HR75_AEDAE)
2.396	0.045131	Solyc06g073180.2.1	"Zinc finger protein CONSTANS-LIKE 1 (AHRD V1 *--- COL1_ARATH)
2.395	0.026843	Solyc02g064950.2.1	"CBS domain-containing protein-like (AHRD V1 ***- B8AP73_ORYSI
2.394	0.022432	Solyc12g088200.1.1	GO:0047325,GO:0005622 "Inositol-tetrakisphosphate 1-k
2.394	0.02078	Solyc07g007790.2.1	"Sucrose phosphate synthase (AHRD V1 **** Q2HYI0_CUCME)
2.393	0.019289	Solyc11g042930.1.1	GO:0005515 "SKP1 (AHRD V1 ***- Q68GS0_TOBAC)
2.393	0.045096	Solyc01g028900.2.1	1-deoxy-D-xylulose-5-phosphate synthase (AHRD V1 **-- DXS_DESAP)
2.393	0.038669	Solyc05g052470.2.1	"Ferritin (AHRD V1 ***- A7UGG8_SOLTU)
2.393	0.030283	Solyc07g021540.2.1	FIP1 (AHRD V1 **-- B6TPG9_MAIZE)
2.392	0.036314	Solyc01g111750.2.1	Heat shock protein DnaJ domain protein (AHRD V1 *--- B7K9K5_CYAP7)
2.391	0.019666	Solyc02g068230.2.1	Membrane-anchored ubiquitin-fold protein 2 (AHRD V1 ***- D7M7C8_ARALY);
2.39	0.024918	Solyc08g083110.2.1	"Cystathionine gamma-lyase (AHRD V1 ***- D2LF58_RHOVA)
2.389	0.019606	Solyc07g053180.2.1	Lrr, resistance protein fragment GO:0005515 GO:0005515
2.389	0.026685	Solyc08g078530.2.1	Agenet domain containing protein expressed (AHRD V1 *-*- Q108Y7_ORYSJ)
2.389	0.048924	Solyc09g008230.2.1	"Zinc finger protein 593 (Fragment) (AHRD V1 **-- B2L5L2_XENBO
2.386	0.024144	Solyc02g085640.2.1	"Xaa-Pro aminopeptidase 1 (AHRD V1 ***- Q93X46_SOLLC)
2.385	0.017461	Solyc05g005730.2.1	RRP15-like protein (AHRD V1 *-*- C1C024_9MAXI);
2.383	0.015498	Solyc09g065330.2.1	"40S ribosomal protein S24 (AHRD V1 ***- C6TAW2_SOYBN)
2.383	0.029425	Solyc09g091790.2.1	"E3 ubiquitin-protein ligase PRT1 (AHRD V1 **-* PRT1_ARATH)
2.38	0.015558	Solyc03g117480.2.1	"Pyrophosphate-energized proton pump (Pyrophosphate-energized
2.376	0.015633	Solyc07g056340.2.1	"RNA-binding protein (AHRD V1 *--* A8JCE7_CHLRE)
2.376	0.021478	Solyc11g010200.1.1	14-3-3 protein beta/alpha-1 (AHRD V1 **-- 143B1_ONCMY)
2.376	0.021197	Solyc01g066310.2.1	Acyl-CoA dehydrogenase (AHRD V1 *-** A6F634_9ALTE);
2.376	0.034502	Solyc08g006290.1.1	Unknown Protein (AHRD V1)
2.375	0.018684	Solyc02g021550.2.1	"Eukaryotic translation initiation factor 4E (AHRD V1 ***- Q00
2.374	0.017706	Solyc09g059030.2.1	"Alcohol dehydrogenase zinc-containing (AHRD V1 **-* Q637W0_BA
2.374	0.022006	Solyc01g103710.2.1	Fe/S biogenesis protein nfuA (AHRD V1 *--- NFUA_BUCCC)
2.373	0.028241	Solyc01g099810.2.1	Arginine/serine-rich splicing factor (AHRD V1 ***- Q176A9_AEDAE)
2.373	0.032108	Solyc11g010240.1.1	GO:0003714 "Protein SCAI (AHRD V1 ***- SCAI_HUMAN)"
2.372	0.017454	Solyc01g068400.2.1	Tubulin-specific chaperone A (AHRD V1 **** C1C4Y4_RANCA)
2.37	0.022318	Solyc01g091260.2.1	AT2G45380 protein (Fragment) (AHRD V1 *-*- B9DGW8_ARATH)
2.37	0.020225	Solyc08g077930.2.1	Isocitrate dehydrogenase (AHRD V1 ***- Q17P79_AEDAE)
2.367	0.04944	Solyc06g063070.2.1	Ethylene responsive transcription factor 2a (AHRD V1 ***- C0J9I7_9ROSA)
2.367	0.023989	Solyc01g102720.2.1	START domain containing 10 (Fragment) (AHRD V1 **-- Q52LA1_MOUSE)
2.366	0.018998	Solyc06g076750.2.1	Peptide transporter (AHRD V1 **-* O48542_HORVU)
2.365	0.021311	Solyc01g010940.2.1	Transmembrane emp24 domain-containing protein 10 (AHRD V1 ***- B6U439_MAIZE)
2.364	0.033338	Solyc02g014840.2.1	Unknown Protein (AHRD V1)
2.363	0.024374	Solyc02g082420.2.1	Ring finger protein (AHRD V1 *-*- O49869_HORVU)
2.363	0.019223	Solyc02g093490.2.1	factor 29 homolog (AHRD V1 ***- B5XG72_SALSA)
2.36	0.031632	Solyc01g005030.2.1	Serine/threonine-protein kinase 36 (AHRD V1 *-*- STK36_HUMAN)
2.36	0.020811	Solyc02g063090.2.1	T-complex protein 1 subunit zeta (AHRD V1 ***- B6T8Q5_MAIZE);
2.353	0.023354	Solyc06g062520.1.1	GO:0045449 "Dof zinc finger protein 4 (AHRD V1 *-*- A
2.352	0.016455	Solyc03g019890.2.1	"Beta-galactosidase (AHRD V1 ***- A2JGX1_SOLLC)
2.352	0.034407	Solyc01g109700.2.1	Transcription factor (AHRD V1 *-** D6MKM4_9ASPA)
2.349	0.017016	Solyc02g077240.2.1	"Pyruvate decarboxylase (AHRD V1 **** Q1I1D9_CITSI)
2.348	0.024098	Solyc04g026350.2.1	"Calmodulin (AHRD V1 ***- B0WM51_CULQU)
2.346	0.028718	Solyc02g071100.2.1	Purine permease family protein (AHRD V1 **-* D7MCV2_ARALY)
2.343	0.024163	Solyc11g011140.1.1	50S ribosomal protein L23 (AHRD V1 *-*- C0N8Z1_9GAMM)
2.341	0.020689	Solyc10g079580.1.1	GO:0003676 "RNA-binding region RNP-1 (AHRD V1 ***- B6
2.34	0.037439	Solyc10g079710.1.1	Uncharacterized plant-specific domain 01589 (AHRD V1 ***- A2Q300_MEDTR)
2.34	0.029103	Solyc05g056130.2.1	"Dolichyl-diphosphooligosaccharide--protein glycosyltransferas
2.339	0.018655	Solyc09g092710.2.1	Glycine rich protein (AHRD V1 ***- Q9FXS8_TOBAC)
2.339	0.02635	Solyc05g054830.2.1	Ankyrin-repeat protein (AHRD V1 **-- A2CIR5_ORYSJ)
2.338	0.020912	Solyc09g075430.2.1	Ribosomal protein L19 (AHRD V1 ***- Q2PYW9_SOLTU)
2.338	0.024712	Solyc08g080090.2.1	chloroplast stay-green protein 2 (AHRD V1 **-- Q5EMP6_SOYBN)"
2.334	0.01855	Solyc04g079440.2.1	"Serpin (Serine protease inhibitor) (AHRD V1 **-* Q53P13_ORYSJ
2.332	0.017071	Solyc02g091190.2.1	"Methyltransferase-like protein 10 (AHRD V1 **-* B5XB96_SALSA)
2.332	0.033118	Solyc04g078540.2.1	"Cathepsin B-like cysteine proteinase (AHRD V1 **-* CYSP_SCHMA
2.332	0.017662	Solyc02g065770.2.1	COBRA-like protein 4 (AHRD V1 ***- B6SST3_MAIZE)
2.332	0.029102	Solyc04g072890.2.1	WD-40 repeat family protein (AHRD V1 **-- D7KN06_ARALY)
2.331	0.01976	Solyc11g012670.1.1	Pentatricopeptide repeat-containing protein (AHRD V1 ***- D7MRC5_ARALY)
2.331	0.026017	Solyc08g082170.2.1	"Glycoside hydrolase family 28 protein/polygalacturonase famil
2.328	0.017759	Solyc04g007220.2.1	Unknown Protein (AHRD V1)
2.328	0.047756	Solyc09g007010.1.1	GO:0005515 "Pathogenesis related protein PR-1 (AHRD V
2.327	0.045122	Solyc07g039200.2.1	Guanine nucleotide-binding protein subunit beta (AHRD V1 *--* GBB_ARATH)
2.326	0.031414	Solyc06g084260.2.1	"Chalcone isomerase (AHRD V1 ***- B6TFR7_MAIZE)
2.325	0.01861	Solyc10g074690.1.1	GO:0004867 "MRNA complete cds clone RAFL23-01-J08 (AH
2.322	0.023486	Solyc09g007790.1.1	GO:0005515 "Arabidopsis thaliana genomic DNA chromoso
2.321	0.030643	Solyc10g076890.1.1	GO:0003676,GO:0000166,GO:0055114 "RNA recognition mot
2.319	0.017942	Solyc10g078830.1.1	Phosducin-like protein 3 (AHRD V1 ***- B4FF90_MAIZE)
2.317	0.041545	Solyc01g091050.2.1	Pectinesterase (AHRD V1 ***- B9RD90_RICCO)
2.316	0.018582	Solyc09g010940.2.1	Pyrimidine 5&apos-nucleotidase (AHRD V1 ***- D5QKK7_METTR)
2.313	0.039139	Solyc02g021650.2.1	DNA damage-binding protein 1 (AHRD V1 **** C0H989_SALSA)
2.312	0.029102	Solyc05g023830.1.1	"Unknown Protein (AHRD V1)"
2.309	0.028565	Solyc10g084050.1.1	26S protease regulatory subunit 6B homolog (AHRD V1 *--- PRS6B_ARATH)
2.307	0.022543	Solyc04g079930.2.1	Os10g0358600 protein (Fragment) (AHRD V1 ***- Q0IY80_ORYSJ)
2.306	0.018705	Solyc10g005060.2.1	"O-methyltransferase-like protein (AHRD V1 **** D3JZ18_PRUMU)
2.306	0.020811	Solyc07g017900.2.1	"Aldose 1-epimerase family protein (AHRD V1 **** D7MN90_ARALY)
2.305	0.049995	Solyc02g071620.2.1	GDSL esterase/lipase At1g29670 (AHRD V1 ***- GDL15_ARATH)
2.304	0.021183	Solyc04g080460.2.1	"Glucose transporter 8 (AHRD V1 ***- Q2KKJ3_SOLIN)
2.303	0.018778	Solyc01g005550.2.1	Carboxyl-terminal peptidase (AHRD V1 ***- B6U8T6_MAIZE)
2.302	0.02554	Solyc05g052040.1.1	GO:0003700 "Ethylene responsive transcription factor
2.3	0.039697	Solyc05g014230.2.1	Zinc finger family protein (AHRD V1 **-- D7KQC9_ARALY)
2.3	0.027561	Solyc03g116500.2.1	"Polygalacturonase (AHRD V1 ***- Q9M7D3_SOLLC)
2.3	0.020532	Solyc02g066940.2.1	"Splicing factor -like RNA-binding domain protein (AHRD V1 *--
2.3	0.037006	Solyc05g053220.2.1	rRNA-processing protein FCF2 (AHRD V1 *--- B2VVS0_PYRTR);
2.298	0.027602	Solyc03g096940.2.1	"NADH ubiquinone oxidoreductase subunit (AHRD V1 *-** D5RN95_9
2.296	0.03762	Solyc11g066820.1.1	Cellulose synthase-like C6 glycosyltransferase family 2 (AHRD V1 **-- A6N4C3_PHYPA)
2.296	0.0425	Solyc02g005210.2.1	CPLD51 protein required for cyt b6 assembly (AHRD V1 **-- D8LHH2_ECTSI)
2.293	0.027683	Solyc06g069780.2.1	E3 ubiquitin-protein ligase MARCH3 (AHRD V1 *--- B5X3M1_SALSA)
2.289	0.022678	Solyc06g009220.2.1	Glycogen debranching enzyme (AHRD V1 ***- B1R1G0_CLOBU)
2.289	0.025423	Solyc09g015020.1.1	GO:0051082 "class I heat shock protein 3 (AHRD V1 ***
2.286	0.022692	Solyc12g049560.1.1	Ethylene responsive transcription factor 2a (AHRD V1 ***- C0J9I7_9ROSA)
2.284	0.027694	Solyc02g093830.2.1	Glucose-6-phosphate 1-dehydrogenase (AHRD V1 **** Q2XTC4_SOLTU)
2.283	0.031135	Solyc12g011270.1.1	GO:0005622 "Elongation factor Ts (AHRD V1 ***- Q9SWW0
2.283	0.046303	Solyc03g123410.1.1	Oxalate oxidase-like germin 171 (AHRD V1 **** Q9FPQ0_BETVU)
2.283	0.027001	Solyc11g007990.1.1	GO:0030060 "Malate dehydrogenase (AHRD V1 **** Q5NE17
2.278	0.027001	Solyc03g122340.2.1	Lipoxygenase (AHRD V1 **** Q96574_SOLLC)
2.278	0.018714	Solyc08g081010.2.1	Glutamate-cysteine ligase (AHRD V1 **** Q7Y0R4_BRAJU)
2.278	0.01935	Solyc07g014730.2.1	Phospholipase A2 (AHRD V1 **** Q5CCT8_TOBAC)
2.277	0.019164	Solyc11g061770.1.1	GO:0008270 "Zinc finger A20 and AN1 domain-containing
2.273	0.020558	Solyc07g005210.2.1	Outer membrane lipoprotein blc (AHRD V1 **-- D0RZG9_ACICA)
2.273	0.021405	Solyc09g011660.2.1	Universal stress protein 1 (AHRD V1 ***- B0YQX0_GOSAR)
2.272	0.033199	Solyc02g064630.2.1	"Histone-like protein (Fragment) (AHRD V1 *--- Q93VE8_FRILI)
2.27	0.028394	Solyc08g074560.2.1	Uncharacterized aarF domain-containing protein kinase 1 (AHRD V1 *--- ADCK1_CHICK)
2.269	0.019804	Solyc08g075090.2.1	"60S ribosomal protein L7 (AHRD V1 *-*- D7MY49_ARALY)
2.269	0.019842	Solyc00g005050.2.1	Arabinogalactan protein (AHRD V1 ***- B6SST2_MAIZE)
2.268	0.030773	Solyc05g051000.2.1	"40S ribosomal protein S13 (AHRD V1 ***- D7LRU2_ARALY)
2.266	0.024904	Solyc01g088610.2.1	chaperonin (AHRD V1 ***- B5IMI3_9CHRO);
2.266	0.043922	Solyc04g076090.2.1	"Glucose-6-phosphate isomerase 2"
2.266	0.026919	Solyc01g112020.2.1	Pentatricopeptide repeat-containing protein (AHRD V1 *-*- D7MUM4_ARALY);
2.266	0.024161	Solyc07g049690.2.1	Cytochrome P450 GO:0020037 GO:0020037
2.264	0.022866	Solyc03g098000.2.1	At1g32160/F3C3_6 (AHRD V1 ***- Q9FVR1_ARATH)
2.264	0.045684	Solyc06g072460.1.1	GO:0019992,GO:0020037 "CHP-rich zinc finger protein-l
2.264	0.021725	Solyc06g074290.1.1	"Unknown Protein (AHRD V1)"
2.262	0.022801	Solyc01g088080.2.1	T-complex protein theta subunit (AHRD V1 ***- A8IF08_CHLRE)
2.26	0.021674	Solyc04g054320.2.1	BZIP transcription factor (AHRD V1 **** A7Y1S1_BRAJU)
2.26	0.019558	Solyc01g099020.2.1	GDSL esterase/lipase At5g03980 (AHRD V1 ***- GDL74_ARATH)
2.25	0.040502	Solyc04g014560.2.1	Pre-mRNA-splicing factor 38B (AHRD V1 *-*- C0HBS4_SALSA)
2.243	0.026449	Solyc10g081650.1.1	Carotenoid isomerase, chloroplastic GO:0008033,GO:0016117,GO:0016491 GO:0046608 GO:0008033,GO:0016117,GO:0016491,GO:0046608
2.243	0.02232	Solyc07g062060.2.1	"Peptide methionine sulfoxide reductase msrB (AHRD V1 ***- B6T
2.243	0.041238	Solyc12g040680.1.1	Mitogen-activated protein kinase 9 (AHRD V1 **** Q5XU40_BRANA)
2.242	0.02374	Solyc11g069380.1.1	4-hydroxy-3-methylbut-2-en-1-yl diphosphate synthase (AHRD V1 ***- A9ZN14_HEVBR)
2.237	0.02471	Solyc06g082270.1.1	Mitochondrial import inner membrane translocase subunit Tim17 (AHRD V1 ***- B6TP97_MAIZE)
2.237	0.027765	Solyc07g056200.2.1	class disease resistance protein (AHRD V1 **-- D5L9G6_ORYSI)"
2.237	0.042688	Solyc03g098730.1.1	Kunitz trypsin inhibitor (AHRD V1 ***- B8Y888_TOBAC)
2.234	0.024144	Solyc03g122300.1.1	"Unknown Protein (AHRD V1)
2.231	0.027826	Solyc04g014370.2.1	"Tyrosine phosphatase-like (AHRD V1 ***- Q5ZEI6_ORYSJ)
2.229	0.025858	Solyc08g062190.2.1	"Nitrilase 2 (AHRD V1 **-* D3BLP1_POLPA)
2.229	0.031667	Solyc01g079220.2.1	NifU like protein (AHRD V1 *-*- B8BR62_THAPS)
2.228	0.021592	Solyc02g088730.1.1	F-box family protein-like (AHRD V1 ***- Q307Y5_SOLTU)
2.227	0.033703	Solyc03g093640.2.1	"Polycomb group protein EMBRYONIC FLOWER 2 (AHRD V1 **-- EMF2_
2.225	0.021807	Solyc08g076100.2.1	"BZIP transcription factor 3 (AHRD V1 **** Q94KA7_PHAVU)
2.223	0.026527	Solyc10g054030.1.1	GO:0008270 "AT2G21500 protein (Fragment) (AHRD V1 **-
2.223	0.047058	Solyc11g064950.1.1	BZIP transcription factor (AHRD V1 **** Q9SQK1_TOBAC)
2.223	0.030121	Solyc01g096710.2.1	Nuclear transcription factor Y subunit C-1 (AHRD V1 *--- B6SWV5_MAIZE)
2.222	0.021078	Solyc01g103970.2.1	"RING finger protein 170 (AHRD V1 ***- C1BQ68_9MAXI)
2.219	0.021718	Solyc09g090100.2.1	"Cryptochrome 2"
2.217	0.026847	Solyc02g083180.2.1	Unknown Protein (AHRD V1)
2.217	0.026827	Solyc10g081660.1.1	Sucrose phosphate phosphatase (AHRD V1 ***- Q5J3N8_ACTCH)
2.216	0.021183	Solyc01g094910.2.1	"Ferric reductase oxidase (AHRD V1 **-* D6RVS5_HORVU)
2.212	0.03396	Solyc03g123660.2.1	"Ubiquitin conjugating enzyme 2 (AHRD V1 **** Q94FU3_SOLLC)
2.211	0.021139	Solyc01g067800.2.1	E3 ubiquitin-protein ligase MARCH1 (AHRD V1 *--* MARH1_MOUSE)
2.21	0.047233	Solyc02g086750.1.1	PWWP domain-containing protein (AHRD V1 *-*- D7L8B3_ARALY)
2.21	0.035895	Solyc01g111570.2.1	Receptor-like kinase (AHRD V1 *-*- A7VM42_MARPO)
2.205	0.022235	Solyc01g104680.2.1	"GTP-binding nuclear protein Ran-A1 (AHRD V1 **-- B3TM31_ELAGV
2.205	0.02141	Solyc04g057980.2.1	"NAD(P)H-quinone oxidoreductase subunit M (AHRD V1 *-*- D8G7H3
2.205	0.042136	Solyc00g187050.2.1	"Leucyl aminopeptidase (AHRD V1 ***- D7DWG6_NOSA0)
2.203	0.026723	Solyc03g019790.2.1	Alpha-galactosidase (AHRD V1 **** Q9SP05_SOLLC)
2.202	0.027868	Solyc08g081300.2.1	"Ring finger protein 126 (AHRD V1 *-*- Q28DW8_XENTR)
2.202	0.028431	Solyc05g012480.2.1	"Mitochondrial processing peptidase beta subunit (AHRD V1 ***-
2.201	0.021139	Solyc09g010930.2.1	"NAD-dependent epimerase/dehydratase (AHRD V1 **-- B6T962_MAIZ
2.201	0.031384	Solyc05g013130.2.1	Transmembrane emp24 domain-containing protein 10 (AHRD V1 ***- B6U439_MAIZE)
2.198	0.041823	Solyc03g007470.2.1	"Ubiquitin-conjugating enzyme E2 10 (AHRD V1 **** UBC10_ARATH)
2.197	0.024698	Solyc01g108020.2.1	"Thioredoxin m (AHRD V1 ***- B9HS17_POPTR)
2.195	0.021588	Solyc04g081150.2.1	"Histone H3 (AHRD V1 ***- A8MRL0_ARATH)
2.194	0.041826	Solyc12g094630.1.1	Unknown Protein (AHRD V1)
2.194	0.024646	Solyc09g009940.2.1	Signal recognition particle protein (AHRD V1 ***- B0CBK0_ACAM1)
2.191	0.038882	Solyc08g066330.1.1	GO:0004693 "Cell division protein kinase 2 (AHRD V1 *
2.188	0.038047	Solyc04g064810.2.1	b (AHRD V1 ***- A8DT12_HAPBU)
2.186	0.027108	Solyc12g010320.1.1	Outer membrane lipoprotein blc (AHRD V1 **-- D0RZG9_ACICA)
2.185	0.024462	Solyc02g068090.2.1	30S ribosomal protein S21, chloroplastic (Fragment) (AHRD V1 *--- RR21_SPIOL)
2.184	0.029729	Solyc10g074860.1.1	"Unknown Protein (AHRD V1)"
2.182	0.025087	Solyc05g056290.2.1	"Acetyl-CoA carboxylase biotin carboxyl carrier protein (AHRD
2.178	0.022586	Solyc10g080590.1.1	GO:0005840 "60S ribosomal protein L21-like protein (A
2.178	0.027544	Solyc06g060420.2.1	YbaK/prolyl-tRNA synthetase (AHRD V1 *-*- D0P7L2_BRUSU);
2.176	0.039692	Solyc04g049130.2.1	At5g03900 (Fragment) (AHRD V1 *-*- B0LQ56_ARATH);
2.176	0.029278	Solyc10g081180.1.1	RNA-binding protein (AHRD V1 *--- Q941H8_SOLTU)
2.175	0.049564	Solyc03g120710.2.1	Harpin-induced protein (AHRD V1 **-- B6TDG9_MAIZE)
2.175	0.041519	Solyc07g065710.2.1	Ribosomal protein S6 kinase alpha-3 (AHRD V1 *-** KS6A3_MOUSE)
2.171	0.02639	Solyc07g047950.1.1	GRAS family transcription factor (AHRD V1 **-* B9IAQ7_POPTR)
2.17	0.038082	Solyc06g068320.2.1	"Prolyl-tRNA synthetase (AHRD V1 **** Q54Q07_DICDI)
2.167	0.031366	Solyc08g079850.1.1	Subtilisin-like protease (AHRD V1 **-- Q9LWA3_SOLLC)
2.166	0.035472	Solyc01g079390.2.1	"Histone-lysine N-methyltransferase MEDEA (AHRD V1 *--- MEDEA_
2.166	0.044495	Solyc11g012830.1.1	"F-box family protein (AHRD V1 ***- D7KKU2_ARALY)
2.164	0.035923	Solyc01g102750.2.1	PHD finger family protein (AHRD V1 **-- D7KBK9_ARALY)
2.162	0.032833	Solyc10g008740.2.1	"Magnesium chelatase ATPase subunit I (AHRD V1 **** Q53RM0_ORY
2.161	0.025107	Solyc10g005370.2.1	"Pyruvate, phosphate dikinase regulatory protein 2 (AHRD V1 **
2.161	0.04186	Solyc06g074300.2.1	"Ribosomal protein (AHRD V1 ***- Q6ER67_ORYSJ)
2.161	0.022351	Solyc06g060370.2.1	Organic anion transporter (AHRD V1 **-* B4G1R1_MAIZE)
2.16	0.036569	Solyc10g086020.1.1	GO:0005840,GO:0015935 "30S ribosomal protein S12 (AHR
2.159	0.038246	Solyc07g063960.2.1	"50S ribosomal protein L24 (AHRD V1 ***- B4FTJ3_MAIZE)
2.159	0.029102	Solyc04g078920.2.1	"Peroxisomal multifunctional enzyme type 2 (AHRD V1 **-- B6TQ9
2.159	0.022459	Solyc01g094370.2.1	"Remorin 2 (AHRD V1 ***- Q9XEX9_SOLLC)
2.153	0.035759	Solyc12g014410.1.1	GO:0004525 "Ribonuclease III family protein (AHRD V1
2.153	0.024769	Solyc08g081150.2.1	GMP synthase (AHRD V1 ***- D3KZU2_9BACT)
2.152	0.028864	Solyc07g043000.2.1	Unknown Protein (AHRD V1)
2.15	0.032063	Solyc01g010050.2.1	S-adenosylmethionine decarboxylase proenzyme (AHRD V1 **** Q7XZQ9_VITVI)
2.147	0.032289	Solyc08g082920.2.1	"ORM1-like protein 2 (AHRD V1 ***- B4FEN2_MAIZE)
2.145	0.026585	Solyc07g063520.2.1	Transmembrane protein 34 (AHRD V1 ***- A5D9H3_BOVIN)
2.144	0.026667	Solyc07g064970.2.1	Microtubule-associated protein MAP65-1a (AHRD V1 **** Q9FEV9_TOBAC)
2.143	0.024105	Solyc01g098190.2.1	Sodium/hydrogen exchanger (AHRD V1 **** Q1JRA2_SOLLC)
2.14	0.025412	Solyc05g012070.2.1	"Alpha-1 4-glucan-protein synthase (AHRD V1 **-* B9RLK7_RICCO)
2.139	0.02994	Solyc06g065900.2.1	Serine-rich protein (AHRD V1 ***- Q8L8M8_ARATH)
2.136	0.035743	Solyc12g009400.1.1	GO:0031072 "Pyruvate dehydrogenase E1 component alpha
2.134	0.037014	Solyc06g083110.1.1	GO:0016020 "Conserved hypothetical membrane protein (
2.133	0.035722	Solyc02g081970.2.1	"Vacuolar sorting receptor 7 (AHRD V1 **** B6UEQ5_MAIZE)
2.133	0.030796	Solyc03g062830.2.1	"Nudix hydrolase 23 (AHRD V1 *-*- B6TED1_MAIZE)
2.132	0.032658	Solyc03g114930.2.1	Photosystem II oxygen evolving complex protein PsbP (AHRD V1 ***- A0ZMM6_NODSP)
2.131	0.039131	Solyc12g009300.1.1	Sucrose synthase (AHRD V1 **** O82693_SOLLC)
2.13	0.040415	Solyc06g082800.2.1	Mitochondrial import receptor subunit TOM40 (AHRD V1 ***- B6TEP3_MAIZE)
2.129	0.024463	Solyc07g062950.2.1	BHLH transcription factor (AHRD V1 *-*- Q9XIN0_ARATH)
2.129	0.044737	Solyc06g083790.2.1	Succinyl-CoA ligase (AHRD V1 **** B4D5D9_9BACT)
2.129	0.025134	Solyc08g008210.2.1	"V-type proton ATPase subunit E (AHRD V1 **** D3PGM0_9MAXI)
2.128	0.035641	Solyc05g049880.2.1	Unknown Protein (AHRD V1)
2.127	0.044014	Solyc01g111040.2.1	"EF-Hand containing protein-like (AHRD V1 ***- Q9T0I9_ARATH)
2.127	0.032126	Solyc01g094720.2.1	Vesicular glutamate transporter (AHRD V1 **-* B3A011_9PULM)
2.126	0.030943	Solyc06g065570.2.1	"N-acetyltransferase (AHRD V1 ***- Q1HQ22_BOMMO)
2.125	0.03661	Solyc07g056570.1.1	9-cis-epoxycarotenoid dioxygenase GO:0045549 GO:0045549
2.124	0.025733	Solyc05g055640.2.1	60S ribosomal protein L38 (AHRD V1 ***- D7LK18_ARALY)
2.12	0.035723	Solyc02g068130.2.1	"Mitochondrial import receptor subunit TOM20 (AHRD V1 ***- B3T
2.119	0.027236	Solyc11g069050.1.1	4-coumarate-coa ligase (AHRD V1 **** B9N213_POPTR)
2.118	0.034578	Solyc07g048120.2.1	"Ubiquitin fusion degradation protein 1 (AHRD V1 ***- C5FJE2_N
2.114	0.032929	Solyc01g090950.2.1	GRAS family transcription factor (AHRD V1 **-- B9GPD0_POPTR)
2.113	0.043842	Solyc06g053670.1.1	GO:0004165 "Enoyl-CoA hydratase/isomerase family prot
2.108	0.039042	Solyc06g050700.2.1	Early response to dehydration 15-like protein (Fragment) (AHRD V1 **-- Q5MEE1_PSEMZ) GO:0005515 GO:0005515
2.106	0.026346	Solyc05g009330.2.1	COSII_At1g13380 (Fragment) (AHRD V1 *-*- C0KEX8_SOLPN)
2.105	0.04746	Solyc03g093300.2.1	2-phosphoglycerate kinase (AHRD V1 ***- C3SAC6_BRADI)
2.103	0.027719	Solyc04g064680.2.1	Exostosin family protein (AHRD V1 ***- D7KK15_ARALY)
2.1	0.028123	Solyc05g055170.2.1	Charged multivesicular body protein 5 (AHRD V1 **-- B6TYU1_MAIZE)
2.095	0.03701	Solyc07g066010.2.1	Amino acid permease (AHRD V1 **** B9N5L8_POPTR)
2.094	0.031879	Solyc01g091070.2.1	Methionine aminopeptidase (AHRD V1 ***- B9RD92_RICCO)
2.094	0.043989	Solyc03g045060.2.1	"Zinc finger CCHC domain-containing protein 8 (AHRD V1 *--- ZC
2.094	0.028156	Solyc11g072940.1.1	CCR4-NOT transcription complex subunit 2 (AHRD V1 **-- B6SVB8_MAIZE)
2.093	0.030149	Solyc01g081030.2.1	"Protein SCAI (AHRD V1 ***- SCAI_MOUSE)"
2.093	0.045751	Solyc01g005600.2.1	Adenosine 5&apos-phosphosulfate reductase 8 (AHRD V1 ***- Q5EUC2_MAIZE);
2.089	0.027826	Solyc04g024500.2.1	UPF0760 protein C2orf29 homolog (AHRD V1 ***- CB029_DANRE)
2.087	0.031893	Solyc06g035920.2.1	Remorin 1 (AHRD V1 ***- Q9XEX8_SOLLC)
2.087	0.030317	Solyc03g007810.2.1	Pyruvate kinase (AHRD V1 ***- A5BTB0_VITVI)
2.085	0.029102	Solyc04g072440.2.1	complete cds clone RAFL23-27-B01 (AHRD V1 **-- Q67Z09_ARATH)"
2.084	0.031584	Solyc08g065420.2.1	BEL1-like homeodomain protein 3 (AHRD V1 *--- BLH3_ARATH)
2.083	0.030099	Solyc07g008710.2.1	Major latex-like protein (AHRD V1 **-- B5THI3_PANGI)
2.081	0.031704	Solyc01g097980.2.1	"Kinase family protein (AHRD V1 *-** D7M4D4_ARALY)
2.081	0.035106	Solyc04g072110.2.1	"Microsomal signal peptidase subunit(SPC25)-like protein (AHRD
2.08	0.049524	Solyc06g065270.2.1	"Adenylate kinase (AHRD V1 **** B6STL7_MAIZE)
2.07	0.036635	Solyc00g009020.2.1	Mitochondrial ATP synthase (AHRD V1 ***- B6TLY8_MAIZE) GO:0005507,GO:0008270,GO:0050897 GO:0005507,GO:0008270,GO:0050897
2.066	0.030943	Solyc06g073920.2.1	"YABBY-like transcription factor CRABS CLAW-like protein (AHRD
2.065	0.027236	Solyc03g111830.2.1	Protein-L-isoaspartate O-methyltransferase (AHRD V1 **** B9I3I9_POPTR)
2.065	0.034056	Solyc12g013530.1.1	"Unknown Protein (AHRD V1)"
2.064	0.04011	Solyc09g092260.2.1	Chaperone protein dnaJ 20 (AHRD V1 ***- B6U349_MAIZE)
2.064	0.035729	Solyc09g083280.2.1	"Auxin responsive protein (AHRD V1 ***- D9IQE6_CATRO)
2.064	0.031785	Solyc02g067660.2.1	Phytoalexin deficient 4 (Fragment) (AHRD V1 **-- B2BDV5_ARALY)
2.062	0.027548	Solyc01g007740.2.1	Peroxiredoxin (AHRD V1 **-- Q9FE12_PHAVU); contains Interpro domain(s)
2.058	0.028202	Solyc00g174340.1.1	Pathogenesis-related protein 1b (AHRD V1 ***- Q941G6_SOLTU)
2.058	0.029217	Solyc05g056020.2.1	V-type proton ATPase subunit G 2 (AHRD V1 **** VATG2_TOBAC)
2.056	0.032377	Solyc05g050530.2.1	"Pyridoxamine 5&apos-phosphate oxidase family protein (AHRD V1
2.054	0.042013	Solyc01g106330.2.1	"Glutamyl-tRNA(Gln) amidotransferase subunit A (AHRD V1 ***- Q
2.054	0.030647	Solyc03g116390.2.1	embryogenesis abundant protein (AHRD V1 ***- Q2QKE8_CATRO)"
2.052	0.030536	Solyc11g008360.1.1	GO:0009451,GO:0003723 "Pseudouridine synthase family
2.051	0.037659	Solyc12g099250.1.1	Kinase family protein (AHRD V1 ***- D7KVQ9_ARALY)
2.051	0.049325	Solyc01g087210.2.1	Cellulose synthase (AHRD V1 **** Q6XP46_SOLTU)
2.05	0.029028	Solyc10g074590.1.1	Pantothenate kinase 4 (AHRD V1 **** B6TFD8_MAIZE)
2.049	0.042545	Solyc12g015690.1.1	Fasciclin-like arabinogalactan protein 10 (AHRD V1 ***- A9XTL5_GOSHI)
2.049	0.047697	Solyc02g068030.1.1	Unknown Protein (AHRD V1)
2.048	0.033559	Solyc01g108190.2.1	Calmodulin-like protein (AHRD V1 ***- Q67TZ4_ORYSJ)
2.047	0.047996	Solyc06g071140.2.1	"EARLY FLOWERING 5 (AHRD V1 *-*- Q6QTF1_ARATH)
2.047	0.048304	Solyc07g056580.2.1	"Ethylene receptor (AHRD V1 **** Q5QG25_SOLLC)
2.043	0.047454	Solyc06g071810.1.1	Receptor like kinase, RLK GO:0005515,GO:0006468 GO:0004675 GO:0004675,GO:0005515,GO:0006468
2.037	0.044019	Solyc01g007930.2.1	Sel1 domain protein repeat-containing protein (AHRD V1 *-*- A5GBQ0_GEOUR)
2.037	0.03785	Solyc02g071170.2.1	"Coatomer subunit zeta-1 (AHRD V1 ***- Q9MAZ0_MAIZE)
2.035	0.046105	Solyc06g074940.2.1	ATP-binding cassette protein (AHRD V1 ***- Q5A2T2_CANAL)
2.035	0.033975	Solyc11g065700.1.1	Nuclear transcription factor Y subunit A-1 (AHRD V1 *-*- B6TAR1_MAIZE)
2.034	0.033253	Solyc11g020300.1.1	Translocon Tic40 (AHRD V1 ***- Q9SC41_PEA)
2.034	0.035184	Solyc08g083500.1.1	cytochrome P450 GO:0020037,GO:0055114 GO:0019825 GO:0019825,GO:0020037,GO:0055114
2.034	0.033571	Solyc09g013080.2.1	Acetyl-coenzyme A carboxylase carboxyl transferase subunit alpha (AHRD V1 *-*- B7KJL9_CYAP7)
2.033	0.034597	Solyc07g042300.1.1	"Disease resistance response (AHRD V1 ***- D7KM73_ARALY)
2.031	0.042545	Solyc06g067960.2.1	"Glutaredoxin family protein (AHRD V1 ***- D7L4W4_ARALY)
2.029	0.02843	Solyc12g011440.1.1	"60S ribosomal protein L18A (AHRD V1 *-*- B6T286_MAIZE)"
2.025	0.038263	Solyc08g066110.2.1	"Profilin (AHRD V1 ***- Q38M47_SOLTU)
2.024	0.034745	Solyc01g008970.2.1	Heterogeneous nuclear ribonucleoprotein A3-like protein 2 (AHRD V1 *--- B6TV58_MAIZE);
2.024	0.029804	Solyc12g098950.1.1	Novel plant SNARE 11 (AHRD V1 ***- B6U1B4_MAIZE)
2.024	0.046291	Solyc11g011020.1.1	Receptor like kinase, RLK GO:0005515,GO:0006468 GO:0004674,GO:0005515 GO:0004674,GO:0005515,GO:0006468
2.021	0.040147	Solyc01g091160.2.1	"Agmatinase (AHRD V1 ***- Q1IPT1_ACIBL)
2.019	0.033974	Solyc12g070100.1.1	Mediator of RNA polymerase II transcription subunit 25 (AHRD V1 *-** MED25_XENTR) GO:0003713 GO:0003713
2.017	0.046451	Solyc11g069800.1.1	cytochrome P450 GO:0020037 GO:0009978,GO:0019825 GO:0009978,GO:0019825,GO:0020037
2.016	0.047373	Solyc07g056420.2.1	"Glutathione S-transferase-like protein (AHRD V1 **** Q8GVD1_S
2.015	0.04174	Solyc03g113100.2.1	Ubiquitin-conjugating enzyme E2 2 (AHRD V1 ***- UBC2_MEDSA)
2.015	0.034573	Solyc01g008070.2.1	Alpha/beta superfamily hydrolase (AHRD V1 *--- D0CIF5_9SYNE)
2.014	0.030889	Solyc12g038970.1.1	GO:0047632,GO:0004668 "Agmatine deiminase (AHRD V1 **
2.014	0.032804	Solyc07g008050.2.1	RING finger protein (AHRD V1 **-- B6JVU3_SCHJY)
2.013	0.034961	Solyc06g051760.2.1	Arginyl-tRNA--protein transferase 1 (AHRD V1 ***- B9SLM9_RICCO)
2.012	0.036912	Solyc04g080100.2.1	"Cytochrome P450"
2.012	0.036499	Solyc05g043430.2.1	"Carboxymethylenebutenolidase-like protein (AHRD V1 ***- Q8LQS
2.009	0.033625	Solyc07g065020.2.1	"Serine/threonine-protein phosphatase (AHRD V1 **** B9I197_POP
2.009	0.031255	Solyc03g120450.2.1	"Aminotransferase (AHRD V1 ***- Q39Q29_GEOMG)
2.008	0.029804	Solyc01g028830.2.1	"ATP binding / serine-threonine kinase (AHRD V1 **** C5DB71_VI
2.006	0.034003	Solyc10g053970.1.1	SEC14-like protein (AHRD V1 **-- Q9T026_ARATH)
2.006	0.036643	Solyc12g099970.1.1	5-amp-activated protein kinase beta subunit (AHRD V1 **** Q17IU7_AEDAE)
2.004	0.048177	Solyc02g084030.2.1	"Peptide methionine sulfoxide reductase msrA (AHRD V1 *-** C7N
2.002	0.046622	Solyc11g007130.1.1	Major facilitator superfamily MFS_1 (AHRD V1 **-- C6ASI0_RHILS)
2.001	0.038847	Solyc03g033600.2.1	"Small nuclear ribonucleoprotein Sm D3 (AHRD V1 ***- B6UDW2_MA
2.001	0.030359	Solyc07g045460.2.1	5-AMP-activated protein kinase subunit beta-1 (AHRD V1 **** C1BGS7_ONCMY)
2	0.031402	Solyc05g007070.2.1	Alpha amylase 2 (IC) (AHRD V1 *-** Q010P9_OSTTA)
2	0.033504	Solyc08g079450.2.1	GO:0019825 "cytochrome P450"
2	0.047058	Solyc06g005150.2.1	"Ascorbate peroxidase (AHRD V1 ***- Q52QQ4_SOLLC)
1.999	0.039529	Solyc08g014470.2.1	Amidohydrolase family protein (AHRD V1 ***- C1F7G0_ACIC5)
1.998	0.03605	Solyc02g068750.1.1	GO:0005515 "O-sialoglycoprotein endopeptidase (AHRD V
1.998	0.048665	Solyc09g007090.2.1	Unknown Protein (AHRD V1)
1.997	0.033784	Solyc01g098550.2.1	Tryptophan synthase alpha chain (AHRD V1 ***- Q8LA83_ARATH)
1.996	0.033895	Solyc03g096980.1.1	GO:0019825 "Cytochrome P450"
1.996	0.032422	Solyc06g053840.2.1	"Auxin responsive protein (AHRD V1 ***- D9IQE6_CATRO)
1.996	0.042137	Solyc06g050210.2.1	facilitator superfamily MFS_1 (AHRD V1 ***- B2IEC2_BEII9)"
1.995	0.031261	Solyc07g053720.2.1	"Tyrosine aminotransferase-like protein (AHRD V1 **** Q9LVY1_A
1.994	0.042355	Solyc07g008110.2.1	"Blue copper protein (Fragment) (AHRD V1 *--- O82576_MAIZE)
1.992	0.044468	Solyc06g034100.2.1	Ubiquinol-cytochrome C chaperone family protein (AHRD V1 ***- D7MQY5_ARALY)
1.989	0.045097	Solyc07g066220.2.1	"WRKY transcription factor 35 (AHRD V1 ***- Q7XAA6_ORYSJ)
1.988	0.047507	Solyc02g089240.2.1	"Zinc finger family protein (AHRD V1 ***- D7KZF4_ARALY)
1.987	0.031832	Solyc04g005510.2.1	"Eukaryotic translation initiation factor 5A (AHRD V1 **** D6N
1.987	0.038417	Solyc00g128870.2.1	Nudix hydrolase 1 (AHRD V1 ***- A6ANR4_VIBHA)
1.986	0.031959	Solyc05g054330.2.1	Epoxide hydrolase (AHRD V1 **** Q41415_SOLTU)
1.985	0.043182	Solyc10g049360.1.1	GO:0016538 "Cyclin-dependent protein kinase regulator
1.984	0.037439	Solyc04g078620.2.1	"Ubiquitin-conjugating enzyme E2 I (AHRD V1 ***- B6U359_MAIZE)
1.984	0.048017	Solyc02g032920.2.1	U3 small nucleolar RNA-associated protein 6 homolog (AHRD V1 *-*- B5XAY9_SALSA)
1.981	0.032063	Solyc04g082380.2.1	Unknown Protein (AHRD V1)
1.98	0.048241	Solyc10g077030.1.1	GO:0019773,GO:0005839 "Proteasome subunit alpha type
1.98	0.045235	Solyc03g005230.2.1	Menaquinone biosynthesis methyltransferase ubiE (AHRD V1 *-** A1BDQ8_CHLPD)
1.979	0.031023	Solyc06g065590.2.1	"60S ribosomal protein L18a (AHRD V1 ***- D2D962_9ROSI)
1.979	0.040962	Solyc02g071920.2.1	Transmembrane water channel Aquaporin Z (AHRD V1 **** B7VL99_VIBSL)
1.978	0.034294	Solyc03g121860.1.1	Mitochondrial import inner membrane translocase subunit tim23 (AHRD V1 ***- B6T238_MAIZE)
1.976	0.034825	Solyc08g065430.2.1	"N-myc downstream regulated protein 3 (Fragment) (AHRD V1 *---
1.972	0.033866	Solyc01g009050.2.1	"Molybdenum cofactor biosynthesis protein (AHRD V1 ***- Q309F9
1.969	0.04272	Solyc12g008760.1.1	Protein arginine N-methyltransferase 1 (AHRD V1 ***- B6TIG8_MAIZE)
1.966	0.033703	Solyc12g099770.1.1	Mitochondria fission 1 protein (AHRD V1 ***- B6T224_MAIZE)
1.966	0.033003	Solyc07g032740.2.1	Aspartate aminotransferase (AHRD V1 **** A9PHH1_POPTR)
1.964	0.032523	Solyc10g047360.1.1	Polyadenylate-binding protein family protein (AHRD V1 **** D7MT99_ARALY)
1.961	0.04741	Solyc01g107860.2.1	CBS domain-containing protein-like (AHRD V1 ***- B8AP73_ORYSI)
1.961	0.039013	Solyc12g096450.1.1	GO:0008270,GO:0005622 "Zinc finger family protein (AH
1.961	0.032063	Solyc09g059520.2.1	Heat stress transcription factor A3 (AHRD V1 *-** D1M7W9_SOLLC)
1.961	0.041341	Solyc06g060100.2.1	"Mannose-6-phosphate isomerase 1.2"
1.96	0.037053	Solyc02g082740.1.1	"Dirigent-like protein 1 (AHRD V1 ***- D2DMN2_GOSHI)
1.959	0.034187	Solyc01g056690.2.1	"Kinase family protein (AHRD V1 ***- D7LFV3_ARALY)
1.958	0.037836	Solyc01g099240.2.1	"3-hydroxyisobutyrate dehydrogenase (AHRD V1 ***- A3ZMK4_9PLAN
1.957	0.034859	Solyc05g015710.2.1	Unknown Protein (AHRD V1)
1.955	0.042778	Solyc10g008410.1.1	RING finger protein 5 (AHRD V1 *-*- B6UBI0_MAIZE)
1.955	0.042419	Solyc08g067040.2.1	Polyadenylation factor subunit 2 (AHRD V1 *--- D6RKS9_COPC7)
1.952	0.042908	Solyc10g007700.2.1	Ras-related protein Rab-2-A (AHRD V1 ***- B6T1U8_MAIZE)
1.951	0.047331	Solyc12g042990.1.1	Glycine-rich protein-like (AHRD V1 *-*- Q5ZB64_ORYSJ)
1.951	0.03701	Solyc03g121540.2.1	"Beta-galactosidase (AHRD V1 ***- Q9ZP11_SOLLC)
1.949	0.044639	Solyc09g090980.2.1	"Major allergen Mal d 1 (AHRD V1 ***- Q84LA7_MALDO)
1.946	0.040536	Solyc09g010180.2.1	TPR repeat-containing protein (AHRD V1 ***- B4D9Q4_9BACT)
1.946	0.035013	Solyc10g049630.1.1	Serine/threonine protein phosphatase 2C (AHRD V1 **** D7LV04_ARALY)
1.946	0.044979	Solyc10g079720.1.1	Cystathionine gamma-lyase (AHRD V1 ***- C1PDC6_BACCO)
1.945	0.049837	Solyc10g051310.1.1	ATP-dependent Clp protease proteolytic subunit (AHRD V1 **** Q42886_SOLLC)
1.945	0.033504	Solyc02g081400.2.1	"Intracellular protease PfpI family protein expressed (AHRD V1
1.943	0.035555	Solyc04g014530.1.1	GO:0003677,GO:0006355 "Ethylene responsive transcript
1.941	0.039352	Solyc12g056220.1.1	GO:0016020,GO:0016021 "Aquaporin (AHRD V1 ***- Q8W507
1.941	0.0343	Solyc04g005540.2.1	"Cc-nbs-lrr, resistance protein"
1.94	0.038574	Solyc04g050270.1.1	"Unknown Protein (AHRD V1)"
1.934	0.048017	Solyc09g082860.2.1	Sulfate adenylyltransferase (AHRD V1 **** Q43183_SOLTU)
1.933	0.047393	Solyc06g069730.2.1	Chlorophyll a-b binding protein 4, chloroplastic (AHRD V1 ***- CA4_ARATH)
1.932	0.046115	Solyc05g056230.2.1	"Calreticulin 2 calcium-binding protein (AHRD V1 **** A8HMC0_C
1.928	0.049307	Solyc03g120430.2.1	Glycerate kinase (AHRD V1 **** C1DYY5_9CHLO) GO:0008887 GO:0008887
1.927	0.036212	Solyc03g114030.2.1	Nucleobase ascorbate transporter (AHRD V1 **-* B9I369_POPTR)
1.925	0.045447	Solyc12g007280.1.1	GO:0006468 "Casein kinase 1-like protein 4 (AHRD V1 *
1.924	0.041376	Solyc06g073740.2.1	Beta-D-glucosidase (AHRD V1 **** Q7XAS3_GOSHI)
1.923	0.042827	Solyc03g096460.2.1	Lipoxygenase homology domain-containing protein 1 (AHRD V1 **-- LOXH1_MOUSE)
1.923	0.035077	Solyc01g079710.2.1	Uncharacterized conserved protein (AHRD V1 **-- Q2U4H5_ASPOR)
1.919	0.049076	Solyc01g102370.2.1	"Flap structure specific endonuclease 1 (AHRD V1 **** Q6DRB5_D
1.915	0.041842	Solyc02g086180.2.1	Sterol C-5 desaturase (AHRD V1 **** D7FW86_ECTSI)
1.915	0.040694	Solyc04g014250.2.1	FIP1 (AHRD V1 **-- B6SNS7_MAIZE);
1.914	0.038172	Solyc06g009520.2.1	Pentatricopeptide repeat-containing protein (AHRD V1 ***- D7LDK6_ARALY)
1.912	0.04979	Solyc12g009560.1.1	"F-box/LRR-repeat protein (AHRD V1 *-*- C0S347_PARBP)
1.91	0.036591	Solyc07g063940.1.1	GO:0003700 "GRAS family transcription factor (AHRD V1
1.909	0.049915	Solyc06g060850.2.1	Ubiquitin carboxyl-terminal hydrolase isozyme L3 (AHRD V1 **** B6T8R6_MAIZE)
1.906	0.045881	Solyc08g065890.2.1	Epsin (AHRD V1 *-*- D3BQV6_POLPA)
1.906	0.038094	Solyc11g007830.1.1	Dual-specificity protein-like phosphatase 3 (AHRD V1 ***- Q3S4H5_MAIZE)
1.905	0.049837	Solyc09g007660.1.1	Fasciclin-like arabinogalactan protein 7 (AHRD V1 ***- A9XTL2_GOSHI)
1.905	0.049381	Solyc02g091580.2.1	"Oligopeptidase A (AHRD V1 ***- Q9LSL3_ARATH)
1.904	0.035585	Solyc02g086660.2.1	ATP dependent RNA helicase (AHRD V1 *-** B3LNW9_YEAS1)
1.901	0.043404	Solyc08g005590.2.1	domain protein (AHRD V1 ***- B1LUR3_METRJ)
1.898	0.039543	Solyc02g063260.2.1	Multidrug resistance protein mdtK (AHRD V1 ***- MDTK_ERWCT)
1.898	0.045148	Solyc02g068740.2.1	Glycine cleavage system H protein 1 (AHRD V1 ***- B6UHJ7_MAIZE)
1.896	0.047219	Solyc11g007960.1.1	GO:0005515 "Kelch domain-containing protein 3 (AHRD V
1.895	0.040629	Solyc08g065160.2.1	"Mediator of RNA polymerase II transcription subunit 10 (AHRD
1.895	0.046709	Solyc12g017460.1.1	GDSL esterase/lipase At1g28590 (AHRD V1 ***- GDL8_ARATH)
1.887	0.036346	Solyc02g079750.2.1	"Flavoprotein wrbA (AHRD V1 ***- B6U724_MAIZE)
1.884	0.036878	Solyc06g069530.2.1	"Acetyl-CoA carboxylase biotin carboxyl carrier protein (AHRD
1.883	0.037532	Solyc05g006660.2.1	cDNA clone J075153F01 full insert sequence (AHRD V1 **-- B7F9A7_ORYSJ)
1.882	0.048177	Solyc12g038820.1.1	GO:0008152 "HAD-superfamily hydrolase subfamily IIA (
1.881	0.040861	Solyc02g088610.2.1	ATP-dependent chaperone ClpB (AHRD V1 **** B5W0X8_SPIMA)
1.881	0.047587	Solyc07g063870.2.1	AT5g54540/MRB17_4 (AHRD V1 *-*- Q9FIV0_ARATH)
1.879	0.03917	Solyc03g094080.2.1	"Polyadenylate-binding protein family protein (AHRD V1 **** D7
1.879	0.043047	Solyc04g009440.2.1	"NAC domain protein (AHRD V1 ***- Q6RH27_SOLLC)
1.877	0.039522	Solyc04g072560.2.1	IST1 homolog (AHRD V1 *--- C1BSR8_9MAXI)
1.87	0.043814	Solyc09g090070.1.1	GO:0005315 "Inorganic phosphate transporter (AHRD V1
1.87	0.048505	Solyc02g070570.2.1	30S ribosomal protein S11 (AHRD V1 ***- RS11_CAUSK)
1.864	0.039382	Solyc07g064700.2.1	DNA-binding bromodomain-containing protein (AHRD V1 *-** D7KJ43_ARALY)
1.863	0.04264	Solyc04g054990.2.1	Lipoxygenase homology domain-containing protein 1 (AHRD V1 *--- LOXH1_HUMAN);
1.86	0.042686	Solyc00g026160.2.1	Ferric reductase oxidase (AHRD V1 **** D6RVS5_HORVU)
1.857	0.038403	Solyc01g095000.2.1	Homology to unknown gene (AHRD V1 *-*- Q019E6_OSTTA)
1.855	0.042688	Solyc03g097560.2.1	MtN3-like protein (AHRD V1 **-- B4FBY7_MAIZE)
1.853	0.0495	Solyc08g080640.1.1	GO:0005515 "Osmotin-like protein (Fragment) (AHRD V1
1.849	0.039543	Solyc01g080250.2.1	BTB/POZ domain containing protein expressed (AHRD V1 ***- Q10C73_ORYSJ)
1.846	0.048017	Solyc11g011990.1.1	Plastid terminal oxydase GO:0005740 GO:0009916 GO:0005740,GO:0009916
1.846	0.043922	Solyc02g083810.2.1	Ferredoxin--NADP reductase (AHRD V1 ***- D7MN04_ARALY)
1.843	0.041464	Solyc06g068740.2.1	"Dehydrogenase/reductase SDR family member 7B (AHRD V1 *-*- DR
1.841	0.044964	Solyc10g044710.1.1	TPR repeat (AHRD V1 ***- Q2HW44_MEDTR)
1.84	0.041653	Solyc02g093900.2.1	Cytochrome c1 (AHRD V1 **** Q9FKS5_ARATH)
1.829	0.041385	Solyc03g114150.2.1	"Aldehyde dehydrogenase (AHRD V1 **** Q1AFF6_9ROSI)
1.829	0.044521	Solyc01g058260.2.1	Poly(A) polymerase (AHRD V1 ***- Q56XM9_ARATH)
1.829	0.048085	Solyc06g082080.2.1	"Integrin-linked kinase-associated serine/threonine phosphatas
1.827	0.04266	Solyc05g012140.2.1	Pentatricopeptide repeat-containing protein At2g30100, chloroplastic (AHRD V1 ***- PP176_ARATH)
1.825	0.044254	Solyc09g011880.2.1	LOC556397 protein (Fragment) (AHRD V1 **-- Q05AJ0_DANRE)
1.825	0.041752	Solyc06g071680.2.1	Histone deacetylase (AHRD V1 ***- B9I3D0_POPTR)
1.824	0.047342	Solyc02g089200.2.1	MADS-box transcription factor (AHRD V1 **** Q3KSZ0_PRUDU)
1.823	0.042158	Solyc04g009960.2.1	"L-allo-threonine aldolase (AHRD V1 **** D7RJ69_CARPA)
1.812	0.045937	Solyc01g100370.2.1	Universal stress protein (AHRD V1 ***- B6SNQ1_MAIZE)
1.811	0.044071	Solyc06g083060.2.1	"FAM96B (AHRD V1 **-- B0WXK4_CULQU)
1.808	0.047529	Solyc01g007920.2.1	Isochorismatase family protein (AHRD V1 ***- B5IAW4_ACIB4)
1.806	0.046272	Solyc02g090670.2.1	Methionine aminopeptidase (AHRD V1 ***- B9H6F3_POPTR)
1.801	0.047739	Solyc09g091820.2.1	AT3g24160/MUJ8_16 (AHRD V1 ***- Q9ZSJ7_ARATH)
1.801	0.044019	Solyc09g065870.2.1	"Copine I-like (AHRD V1 ***- Q5JMT9_ORYSJ)
1.799	0.048506	Solyc10g085420.1.1	"Os03g0816700 protein (Fragment) (AHRD V1 ***- Q0DMC9_ORYSJ)
1.797	0.046581	Solyc07g006490.2.1	Unknown Protein (AHRD V1)
1.794	0.046115	Solyc01g005810.2.1	Mak16 protein (AHRD V1 *-*- Q2HUC0_MEDTR)
1.79	0.04826	Solyc07g007380.2.1	"Endoplasmic reticulum lectin 1 (AHRD V1 **-- ERLEC_MOUSE)
1.784	0.043741	Solyc11g012930.1.1	GO:0016020 "Nodulin family protein (AHRD V1 ***- A7L2
1.772	0.046417	Solyc03g121830.1.1	GO:0004379 "Glycylpeptide N-tetradecanoyltransferase
1.77	0.046328	Solyc05g053260.2.1	DNA methyltransferase (AHRD V1 *-*- Q76KU6_TOBAC)
1.764	0.045682	Solyc02g093640.2.1	3-ketoacyl-CoA reductase 1 (AHRD V1 **-- Q0VH88_GOSHI)
1.761	0.049079	Solyc04g008590.2.1	Pyruvate dehydrogenase E1 component subunit beta (AHRD V1 ***- B6TQ36_MAIZE)
1.758	0.049915	Solyc10g078150.1.1	"Nascent polypeptide-associated complex alpha subunit-like pro
1.758	0.048968	Solyc07g066430.2.1	GTP-binding protein (AHRD V1 **** B0JHK9_MICAN)
1.745	0.048866	Solyc11g066890.1.1	Prephenate dehydratase (AHRD V1 ***- Q6JJ29_IPOTF)
1.732	0.049888	Solyc04g074450.1.1	Phi-1 protein (Fragment) (AHRD V1 ***- Q4LAX0_CAPCH)
1.727	0.048494	Solyc06g007760.2.1	Ycf54 protein (AHRD V1 *--- Q8DIT2_THEEB)
-1.713	0.049564	Solyc02g082860.2.1	Isocitrate dehydrogenase (AHRD V1 **** A3LYS8_PICST)
-1.745	0.047032	Solyc08g065970.2.1	RNA polymerase sigma-70 factor (AHRD V1 **** D7LJA3_ARALY)
-1.747	0.047112	Solyc01g101120.2.1	Glucan endo-1 3-beta-glucosidase 1 (AHRD V1 *-*- B4FGE4_MAIZE)
-1.759	0.047344	Solyc02g077440.2.1	"Transcription elongation factor 1 homolog (AHRD V1 **** C1C36
-1.765	0.048191	Solyc02g082540.2.1	Actin cytoskeleton-regulatory complex protein pan1 (AHRD V1 *--- PAN1_SCLS1)
-1.765	0.045701	Solyc03g033540.2.1	Calcium-dependent protein kinase (AHRD V1 **** C6KGT3_SOLLC)
-1.765	0.048093	Solyc04g005450.2.1	Purple acid phosphatase (AHRD V1 *-** B0WRM8_CULQU)
-1.77	0.047579	Solyc03g026290.2.1	Post-GPI attachment to proteins factor 3 (AHRD V1 **-- PGAP3_XENTR)
-1.773	0.048007	Solyc00g049210.1.1	Cytochrome c-type biogenesis protein CcmF (AHRD V1 *-*- Q1ZIX1_9GAMM)
-1.774	0.046783	Solyc01g108300.2.1	Myb family transcription factor (AHRD V1 **-- D7LQI3_ARALY)
-1.782	0.044123	Solyc06g007150.2.1	GTP-binding protein engB (AHRD V1 *-*- ENGB_CAUCR)
-1.787	0.043654	Solyc10g051200.1.1	Cytochrome c biogenesis protein family (AHRD V1 ***- D7KE35_ARALY)
-1.787	0.046172	Solyc01g081060.2.1	Xyloglucan endotransglucosylase/hydrolase 14 (AHRD V1 **** C0IRH3_ACTDE)
-1.789	0.047808	Solyc09g065720.2.1	Peptidyl-prolyl cis-trans isomerase (AHRD V1 *-*- B9H8E5_POPTR)
-1.789	0.045447	Solyc01g101010.2.1	AGAP008431-PA (Fragment) (AHRD V1 *-*- A7UUL5_ANOGA)
-1.797	0.047772	Solyc04g025540.2.1	Anthranilate phosphoribosyltransferase-like protein (AHRD V1 *-** Q3SM27_THIDA)
-1.802	0.049387	Solyc10g081120.1.1	Alpha-L-arabinofuranosidase (AHRD V1 **** Q76LU4_SOLLC)
-1.804	0.043945	Solyc02g090930.2.1	Lipase (AHRD V1 ***- Q5S8F1_RICCO)
-1.805	0.043945	Solyc03g059260.2.1	"Carboxyl-terminal-processing protease (AHRD V1 ***- B6T6L2_MA
-1.805	0.043272	Solyc05g025500.2.1	Glucan endo-1 3-beta-glucosidase 6 (AHRD V1 ***- B6TW83_MAIZE)
-1.807	0.043187	Solyc02g087400.1.1	Ankyrin repeat domain containing protein (AHRD V1 *--- B2WQ30_PYRTR)
-1.808	0.043741	Solyc01g090630.2.1	2-oxoglutarate-dependent dioxygenase (AHRD V1 ***- B9GL06_POPTR)
-1.817	0.042043	Solyc10g047270.1.1	Potassium transporter family protein (AHRD V1 **** D7KXB7_ARALY)
-1.818	0.041136	Solyc02g085920.2.1	Homology to unknown gene (AHRD V1 *-*- Q00YZ4_OSTTA)
-1.82	0.04212	Solyc04g080010.2.1	UDP-glucosyltransferase (AHRD V1 **** B8QI32_9MAGN)
-1.822	0.045096	Solyc06g069330.2.1	"Serine/threonine protein kinase (AHRD V1 **** Q8L9Q3_ARATH)
-1.829	0.044737	Solyc09g089680.2.1	"1-aminocyclopropane-1-carboxylate oxidase-like protein (AHRD
-1.835	0.041296	Solyc10g008600.2.1	Unknown Protein (AHRD V1)
-1.835	0.045934	Solyc02g080470.2.1	Heat shock protein 4 (AHRD V1 ***- B6U237_MAIZE)
-1.841	0.039576	Solyc01g006830.2.1	Os02g0200800 protein (Fragment) (AHRD V1 *-*- Q0E303_ORYSJ)
-1.841	0.04979	Solyc06g062530.2.1	Serine/threonine protein phosphatase 2A 55 kDa regulatory subunit B beta isoform (AHRD V1 ***- 2ABB_ARATH)
-1.841	0.039681	Solyc07g019440.2.1	Glucose-1-phosphate adenylyltransferase (AHRD V1 **** P93223_SOLLC)
-1.842	0.047756	Solyc01g096500.2.1	D-erythro-sphingosine kinase (AHRD V1 *-** D7MES6_ARALY)
-1.844	0.038937	Solyc09g097880.2.1	DNA topoisomerase (AHRD V1 **** B9RRL8_RICCO)
-1.845	0.046589	Solyc05g052050.1.1	Ethylene responsive transcription factor 1a (AHRD V1 **** D1MWZ3_CITLA)
-1.85	0.039039	Solyc04g077210.2.1	"Knotted-like homeobox protein (AHRD V1 ***- Q49RB7_POPTO)
-1.851	0.046333	Solyc10g079010.1.1	Unknown Protein (AHRD V1) GO:0006265 GO:0006265
-1.851	0.039074	Solyc01g106370.2.1	Os06g0207500 protein (Fragment) (AHRD V1 ***- Q0DDQ9_ORYSJ)
-1.86	0.04979	Solyc01g087530.2.1	Zinc transporter (AHRD V1 *-*- D5H5M3_SALRM)
-1.862	0.047652	Solyc09g090200.2.1	"Serine/threonine-protein kinase 38 (AHRD V1 **** B6U4A0_MAIZE
-1.863	0.04409	Solyc07g047830.2.1	Bzip-like transcription factor-like (AHRD V1 *-*- Q7X997_ORYSJ)
-1.863	0.038789	Solyc08g016170.2.1	3-oxoacyl-(Acyl carrier protein) synthase II (AHRD V1 **** D6YNQ6_CHLT1)
-1.866	0.045988	Solyc02g082400.2.1	Lysine-specific demethylase 3A (AHRD V1 *--* KDM3A_HUMAN)
-1.867	0.043357	Solyc02g092840.1.1	Galactosyltransferase-like protein (Fragment) (AHRD V1 **-- D8RHX9_SELML)
-1.871	0.038351	Solyc09g011320.2.1	Serine/threonine-protein kinase-like protein (AHRD V1 ***- Q9M269_ARATH)
-1.871	0.04613	Solyc03g078790.1.1	UDP-glucosyltransferase family 1 protein (AHRD V1 **-- C6KI45_CITSI)
-1.877	0.043103	Solyc06g053600.2.1	Oxidoreductase aldo/keto reductase family protein expressed (AHRD V1 ***- Q10GW4_ORYSJ)
-1.878	0.039979	Solyc06g073970.1.1	AT5G22070 protein (Fragment) (AHRD V1 ***- B9DHZ2_ARATH)
-1.879	0.043775	Solyc11g017170.1.1	Calcium transporting ATPase (AHRD V1 ***- A8N6A2_COPC7)
-1.879	0.040865	Solyc10g047640.1.1	GATA transcription factor 25 (AHRD V1 **-- B6T4L5_MAIZE)
-1.882	0.042609	Solyc08g078010.2.1	50S ribosomal protein L19 (AHRD V1 *-*- B6T8M1_MAIZE)
-1.882	0.044071	Solyc08g005270.2.1	Poly polymerase catalytic domain containing protein expressed (AHRD V1 **-- Q84T80_ORYSJ)
-1.883	0.042506	Solyc01g057770.2.1	AE family transporter anion exchange (AHRD V1 *--* A4RY02_OSTLU)
-1.885	0.037053	Solyc01g107170.2.1	Zinc finger protein (AHRD V1 ***- A0T3Q5_SOLTU)
-1.885	0.043223	Solyc03g025390.2.1	"Retinol dehydrogenase 12 (AHRD V1 **** B6TAL8_MAIZE)
-1.886	0.049583	Solyc04g054470.2.1	Myosin class II heavy chain (ISS) (AHRD V1 *-*- Q014V4_OSTTA)
-1.888	0.041381	Solyc10g044670.1.1	GO:0042802,GO:0009883 "Phytochrome A"
-1.889	0.047032	Solyc08g076140.2.1	Phosphomevalonate kinase (AHRD V1 ***- Q944G1_HEVBR)
-1.889	0.036329	Solyc02g091460.2.1	"DsRNA-binding protein (AHRD V1 *-*- Q8GUP9_BRAOB)
-1.89	0.04228	Solyc07g008190.2.1	Unknown Protein (AHRD V1)
-1.89	0.040509	Solyc08g080410.2.1	UBX domain-containing protein (AHRD V1 ***- D7MDX6_ARALY)
-1.89	0.039809	Solyc07g043570.2.1	Aldo/keto reductase family protein (AHRD V1 ***- D7KG57_ARALY)
-1.89	0.037899	Solyc06g008300.2.1	polypeptide feature inferred from GFF3 feature
-1.894	0.049564	Solyc06g071370.1.1	"NHL repeat-containing protein-like (AHRD V1 ***- Q6Z2V7_ORYSJ
-1.894	0.04783	Solyc03g115860.2.1	"Endoplasmic reticulum membrane protein YGL010W (AHRD V1 **--
-1.895	0.041383	Solyc03g123680.1.1	Ring H2 finger protein (AHRD V1 *-*- D9ZHD8_HYPPE)
-1.895	0.046115	Solyc04g049160.2.1	Calcium dependent protein kinase (AHRD V1 **** Q93XI9_SOLTU)
-1.898	0.036836	Solyc01g102800.2.1	Histidyl-tRNA synthetase (AHRD V1 *-*- Q52NV4_HUMAN)
-1.9	0.041482	Solyc05g007850.1.1	Tir-nbs-lrr, resistance protein GO:0005515,GO:0006915,GO:0006952,GO:0031224 GO:0000166,GO:0030275 GO:0000166,GO:0005515,GO:0006915,GO:0006952,GO:0030275,GO:0031224
-1.902	0.039887	Solyc03g007480.2.1	"Myosin (AHRD V1 ***- D2UY43_NAEGR)
-1.902	0.043517	Solyc06g008330.1.1	GO:0006468 "Serine/threonine-protein kinase 38 (AHRD
-1.903	0.047036	Solyc03g063240.2.1	Pyridoxamine 5&apos-phosphate oxidase-related FMN-binding protein (AHRD V1 ***- D6UPC6_9BACT)
-1.903	0.04105	Solyc02g024020.2.1	Arf-GAP with GTPase, ANK repeat and PH domain-containing protein 3 (AHRD V1 *--* AGAP3_MOUSE)
-1.906	0.043897	Solyc09g007120.2.1	Unknown Protein (AHRD V1)
-1.909	0.041376	Solyc12g007010.1.1	Cytosolic Fe-S cluster assembly factor NUBP2 homolog (AHRD V1 *--- NUBP2_NEMVE)
-1.912	0.038672	Solyc01g098630.2.1	Import inner membrane translocase subunit Tim44 (AHRD V1 *--- B3Q8B6_RHOPT)
-1.919	0.043774	Solyc11g065830.1.1	2-oxoglutarate/malate translocator-like protein (AHRD V1 **-- Q9LXV3_ARATH)
-1.919	0.044516	Solyc05g009570.2.1	Ribosomal protein PSRP-3/Ycf65 (AHRD V1 *-*- B5W261_SPIMA)
-1.925	0.038153	Solyc07g066530.2.1	Mitochondrial import receptor subunit TOM34 (AHRD V1 *--- B5X380_SALSA)
-1.925	0.036747	Solyc08g015990.2.1	"DUF410 domain protein (AHRD V1 **-- A1CM30_ASPCL)
-1.928	0.047808	Solyc03g013240.2.1	Homology to unknown gene (AHRD V1 ***- Q01H71_OSTTA)
-1.928	0.036048	Solyc12g010520.1.1	Eukaryotic peptide chain release factor subunit 1-1 (AHRD V1 **** B6U1I9_MAIZE)
-1.928	0.042914	Solyc12g013690.1.1	GO:0008152,GO:0016491 "Monooxygenase FAD-binding prot
-1.93	0.04666	Solyc06g083820.2.1	60 ribosomal protein L14 (AHRD V1 ***- B6TMP6_MAIZE)
-1.931	0.046333	Solyc12g099100.1.1	Dihydrolipoyl dehydrogenase (AHRD V1 ***- Q9FEN7_SOLTU)
-1.933	0.033895	Solyc10g005360.2.1	Gibberellin 2-beta-dioxygenase 7 (AHRD V1 **-* B6SZM8_MAIZE)
-1.936	0.047032	Solyc06g063010.2.1	At1g72390-like protein (Fragment) (AHRD V1 *-*- C0JD42_9BRAS)
-1.936	0.034514	Solyc05g018590.2.1	26S protease regulatory subunit 8 homolog A (AHRD V1 ***- PRS8A_ARATH)
-1.939	0.046101	Solyc12g035170.1.1	"Pentatricopeptide repeat-containing protein (AHRD V1 ***- D7K
-1.944	0.033736	Solyc07g009170.2.1	Nudix hydrolase 24 (AHRD V1 ***- B6TUU0_MAIZE)
-1.946	0.034076	Solyc10g005200.2.1	Novel protein (AHRD V1 *-*- B8JM89_DANRE)
-1.946	0.034258	Solyc05g052200.2.1	Protein kinase (AHRD V1 ***- A8HT40_CHLRE)
-1.949	0.045447	Solyc06g083590.2.1	"B3 domain-containing transcription factor ABI3 (AHRD V1 **-*
-1.95	0.035261	Solyc09g042250.1.1	Pentatricopeptide repeat-containing protein (AHRD V1 ***- D7M869_ARALY)
-1.952	0.03589	Solyc12g037980.1.1	GO:0005515 "Actin-like protein 6A (AHRD V1 ***- B6TTQ
-1.954	0.033665	Solyc05g054370.2.1	Acyl-CoA dehydrogenase (AHRD V1 *-** A3JBQ6_9ALTE)
-1.955	0.043185	Solyc03g026240.2.1	Arginine/serine-rich splicing factor 31 (AHRD V1 **-- D7LSQ1_ARALY)
-1.955	0.036206	Solyc08g066940.2.1	Peptide transporter 1 (AHRD V1 **-* Q7XAC3_VICFA)
-1.956	0.040509	Solyc12g042580.1.1	Blue copper-like protein (AHRD V1 *-*- B8Y8A0_GOSHI)
-1.957	0.048882	Solyc03g123840.2.1	RNA binding protein with multiple splicing 2 (Fragment) (AHRD V1 *--- A5YBM9_HORSE)
-1.961	0.034122	Solyc08g066180.2.1	HMP-PP phosphatase (AHRD V1 *--- COF_CITK8)
-1.962	0.032126	Solyc04g007710.2.1	Mitogen-activated protein kinase (AHRD V1 ***- Q1W2K7_WHEAT)
-1.962	0.033953	Solyc01g079350.2.1	PAPA-1-like conserved region family protein expressed (AHRD V1 *-*- Q2QNL7_ORYSJ)
-1.965	0.043979	Solyc01g104770.2.1	Actin (AHRD V1 ***- Q6F4H4_TOBAC)
-1.966	0.03722	Solyc02g089440.2.1	Glycosyltransferase (AHRD V1 **-- B9NC17_POPTR)
-1.967	0.032422	Solyc02g062020.2.1	"Ras-like GTP-binding protein RHO (AHRD V1 **-- RHO_APLCA)
-1.967	0.034573	Solyc01g006050.2.1	Plant viral-response family protein (AHRD V1 **-- B6SQA7_MAIZE)
-1.967	0.035641	Solyc11g028020.1.1	Agamous MADS-box transcription factor (AHRD V1 ***- B2CDE2_9ASPA)
-1.967	0.032465	Solyc09g064720.2.1	"Dienelactone hydrolase family protein (AHRD V1 **-- D7L3C7_AR
-1.968	0.034966	Solyc01g109710.2.1	Universal stress protein (AHRD V1 **-- B6SNQ1_MAIZE)
-1.971	0.046581	Solyc01g104650.2.1	BZIP transcription factor (AHRD V1 **** Q53UC6_WHEAT)
-1.972	0.038414	Solyc06g082890.2.1	S-like RNase (Fragment) (AHRD V1 ***- D8TKF1_VOLCA)
-1.973	0.032362	Solyc07g043550.2.1	"UDP-glucose 4-epimerase (AHRD V1 **** A6LK35_THEM4)
-1.974	0.034502	Solyc01g106430.2.1	"Inorganic pyrophosphatase family protein (AHRD V1 **** D7M262
-1.977	0.035106	Solyc12g044300.1.1	Acyl-CoA synthetase (AMP-forming)/AMP-acid ligase II (AHRD V1 **** C7MWS2_SACVD)
-1.977	0.032658	Solyc08g074830.2.1	F-box family protein (AHRD V1 ***- D7KQH0_ARALY)
-1.977	0.033467	Solyc07g006970.2.1	Solute carrier family 2, facilitated glucose transporter member 5 (AHRD V1 ***- GTR5_RAT)
-1.983	0.04963	Solyc01g098200.2.1	Vesicle-associated membrane protein-associated protein A (AHRD V1 **-- B6UGD8_MAIZE)
-1.985	0.046783	Solyc06g051430.2.1	Transmembrane anterior posterior transformation protein 1 homolog (AHRD V1 *--- TAPT1_CHICK)
-1.991	0.032377	Solyc04g015610.2.1	Os01g0611000 protein (Fragment) (AHRD V1 ***- Q0JLB5_ORYSJ)
-1.992	0.046581	Solyc05g018150.2.1	Phosphatase 1 regulatory subunit 7 (AHRD V1 **-* C1C4C3_RANCA)
-1.993	0.037067	Solyc10g076290.1.1	F-box/LRR-repeat protein 3 (AHRD V1 ***- FBL3_ARATH)
-1.994	0.033977	Solyc10g009230.1.1	Unknown Protein (AHRD V1)
-1.994	0.03461	Solyc08g007860.2.1	Lysophospholipid acyltransferase (AHRD V1 **** B6K7S6_SCHJY)
-1.994	0.042738	Solyc09g098070.2.1	Necrotic spotted lesions 1 (Fragment) (AHRD V1 *-*- B6ZA22_HELAN)
-1.998	0.047362	Solyc09g089660.2.1	Actin-related protein 8 (AHRD V1 ***- B5X2S3_SALSA)
-1.999	0.031366	Solyc05g041360.1.1	Maturase K (AHRD V1 ***- Q70D35_9SOLA)
-1.999	0.048986	Solyc11g011610.1.1	Fatty acid-binding protein-like protein (AHRD V1 ***- D6FMZ4_MYCTU)
-2.001	0.03506	Solyc05g020020.2.1	CONSTANS-like zinc finger protein (AHRD V1 **-- D0EP07_SOYBN)
-2.005	0.046328	Solyc08g008290.2.1	Unknown Protein (AHRD V1)
-2.005	0.036774	Solyc04g050490.2.1	Carboxyl-terminal proteinase (AHRD V1 ***- B6SL47_MAIZE)
-2.007	0.047328	Solyc09g091840.2.1	Glutathione-disulfide reductase (AHRD V1 **** Q1D9Y5_MYXXD)
-2.011	0.036973	Solyc04g010220.2.1	Unknown Protein (AHRD V1)
-2.011	0.033108	Solyc06g071850.2.1	"TPR repeat (AHRD V1 ***- Q469C8_METBF)
-2.016	0.047579	Solyc08g083050.1.1	Unknown Protein (AHRD V1)
-2.017	0.033703	Solyc09g075150.2.1	"60S ribosomal protein L22-2 (AHRD V1 ***- D7L3W0_ARALY)
-2.017	0.036626	Solyc02g083560.2.1	Vacuolar protein sorting 35 (AHRD V1 ***- B6U2K5_MAIZE)
-2.018	0.03198	Solyc08g005350.2.1	F-box family protein (AHRD V1 ***- B9GFH4_POPTR)
-2.022	0.04125	Solyc03g080100.2.1	Copper-translocating P-type ATPase (AHRD V1 *--- Q3JHP1_BURP1)
-2.023	0.03589	Solyc12g049270.1.1	Developmentally-regulated GTP-binding protein 2 (AHRD V1 **** B6TJC5_MAIZE)
-2.025	0.032604	Solyc08g016010.2.1	Ectonucleoside triphosphate diphosphohydrolase 5 (AHRD V1 **-- A1L4C5_HUMAN)
-2.027	0.046709	Solyc06g069210.2.1	CASP-like protein (AHRD V1 ***- D0NFX2_PHYIN)
-2.029	0.028704	Solyc05g013690.2.1	GDSL esterase/lipase At3g26430 (AHRD V1 ***- GDL53_ARATH)
-2.029	0.029153	Solyc01g103740.2.1	Ribosome biogenesis protein ERB1 (AHRD V1 ***- ERB1_CRYNE)
-2.031	0.033338	Solyc02g071320.2.1	Unknown Protein (AHRD V1)
-2.031	0.030038	Solyc01g005130.2.1	Zinc finger protein 7 (AHRD V1 ***- B6U8J3_MAIZE)
-2.032	0.031462	Solyc09g098510.2.1	Unknown Protein (AHRD V1)
-2.032	0.048822	Solyc01g091310.2.1	WD-40 repeat protein (AHRD V1 **-- B2IZJ6_NOSP7)
-2.038	0.044897	Solyc05g053340.2.1	Gibberellin 2-oxidase (AHRD V1 **** A4GVL5_SOLLC)
-2.04	0.036678	Solyc05g051500.2.1	"Histone H3 (AHRD V1 ***- A8MRL0_ARATH)
-2.04	0.049448	Solyc04g011360.2.1	"Ras-related protein Rab-8A (AHRD V1 ***- C1C362_9MAXI)
-2.043	0.047756	Solyc06g062560.1.1	Phosphatase (AHRD V1 ***- D2V497_NAEGR)
-2.043	0.045388	Solyc11g005370.1.1	Small nuclear ribonucleoprotein LsM3 (AHRD V1 **-- D3TPY5_GLOMM)
-2.049	0.030529	Solyc01g106450.2.1	L-galactose dehydrogenase (AHRD V1 **-* Q07A10_NICLS)
-2.052	0.040694	Solyc01g107940.2.1	RING-finger protein like (AHRD V1 *-*- B6SVN2_MAIZE)
-2.055	0.029804	Solyc05g007940.2.1	"Ribonuclease T2 (AHRD V1 ***- Q9ZQX1_CICAR)
-2.057	0.039131	Solyc06g083690.2.1	"Glutaredoxin (AHRD V1 *-*- B5A8A6_WHEAT)
-2.06	0.041505	Solyc03g071570.2.1	Pectate lyase-like protein (AHRD V1 **** Q6U6I9_BRANA)
-2.062	0.030015	Solyc08g022170.1.1	NADH quinone oxidoreductase subunit 7 (AHRD V1 ***- D2BHX7_DEHSV)
-2.067	0.039543	Solyc07g017410.2.1	Unknown Protein (AHRD V1)
-2.069	0.02639	Solyc08g074680.2.1	Polyphenol oxidase (AHRD V1 *-*- Q41428_SOLTU)
-2.07	0.033468	Solyc02g092290.2.1	F-box/LRR-repeat protein At5g02910 (AHRD V1 ***- FBL79_ARATH)
-2.07	0.036748	Solyc08g081020.1.1	Carboxyl-terminal proteinase (AHRD V1 ***- B6SL47_MAIZE)
-2.071	0.029153	Solyc01g094810.2.1	Ubiquitin-conjugating enzyme (AHRD V1 **** D2VN46_NAEGR)
-2.072	0.031027	Solyc08g081750.2.1	CAAX amino terminal protease family protein (AHRD V1 ***- D7MUD5_ARALY)
-2.074	0.027868	Solyc02g092010.2.1	GTP-binding protein hflX (AHRD V1 *-*- B8GW93_CAUCN)
-2.074	0.028971	Solyc01g007640.2.1	Ycf2 (AHRD V1 ***- D2KLP5_OLEEU)
-2.074	0.029426	Solyc11g065280.1.1	GO:0005515,GO:0008810 "Beta-1 3-glucanase (AHRD V1 **
-2.076	0.044922	Solyc06g075590.2.1	CCR4-NOT transcription complex subunit 2 (AHRD V1 **-- B6SVB8_MAIZE)
-2.077	0.029102	Solyc01g087720.2.1	Structural maintenance of chromosomes family protein (AHRD V1 ***- D7M7H7_ARALY)
-2.08	0.028367	Solyc09g009820.2.1	Glutathione S-transferase domain protein (AHRD V1 *--- C6RLV9_ACIRA)
-2.082	0.027414	Solyc02g079510.2.1	Peroxidase (AHRD V1 **** Q50LG4_TOBAC)
-2.083	0.032765	Solyc01g080330.2.1	"Transmembrane BAX inhibitor motif-containing protein 4 (AHRD
-2.083	0.04146	Solyc02g092410.2.1	Adenylyl-sulfate kinase (AHRD V1 **** C6TL96_SOYBN)
-2.085	0.026718	Solyc04g045580.2.1	Os04g0386500 protein (Fragment) (AHRD V1 ***- Q0JDQ2_ORYSJ)
-2.086	0.028683	Solyc06g036130.2.1	Multidrug resistance protein mdtK (AHRD V1 **-- MDTK_YERP3)
-2.087	0.025807	Solyc09g055350.2.1	ABC transporter ATP-binding/permease protein (AHRD V1 **** A3SXQ3_9RHOB)
-2.089	0.029766	Solyc06g050900.2.1	Peptide transporter (AHRD V1 **-* O22305_LOTJA)
-2.089	0.027522	Solyc07g053060.2.1	Pentatricopeptide repeat (AHRD V1 ***- Q2HRN6_MEDTR)
-2.09	0.025733	Solyc11g011040.1.1	GO:0015031,GO:0005525,GO:0005622 "ADP-ribosylation fa
-2.09	0.031643	Solyc04g016200.1.1	GO:0080043 "UDP-glucosyltransferase HvUGT5876 (AHRD V
-2.09	0.034859	Solyc03g115110.2.1	ATP synthase gamma chain (AHRD V1 ***- B9SZS3_RICCO)
-2.092	0.039101	Solyc12g005770.1.1	Zinc finger CCCH domain-containing protein 13 (AHRD V1 ***- C3H13_ORYSJ)
-2.096	0.040724	Solyc01g111190.2.1	Magnesium transporter NIPA2 (AHRD V1 *-*- NIPA2_BOVIN)
-2.096	0.031225	Solyc07g063300.2.1	Regulator of chromosome condensation (RCC1)-like protein (AHRD V1 **-- D0NEM9_PHYIN)
-2.097	0.02544	Solyc05g006590.2.1	"Serine/threonine-protein phosphatase (AHRD V1 **** Q6VUQ6_SOL
-2.1	0.033804	Solyc10g074930.1.1	Protein kinase 2 (AHRD V1 ***- D3BIR2_POLPA)
-2.105	0.02635	Solyc01g007150.2.1	Coatomer subunit beta-1 (AHRD V1 ***- D7MB61_ARALY)
-2.106	0.034937	Solyc12g010540.1.1	NAD dependent epimerase/dehydratase family protein expressed (AHRD V1 ***- Q2MJA7_ORYSJ)
-2.107	0.027577	Solyc05g007820.2.1	"At1g19680-like protein (Fragment) (AHRD V1 *--- Q3YI70_ARALY)
-2.108	0.027108	Solyc03g097680.2.1	"Pyruvate dehydrogenase E1 component subunit beta (AHRD V1 **-
-2.109	0.030265	Solyc12g005100.1.1	UPF0505 protein C16orf62 homolog (AHRD V1 **-- CP062_MOUSE)
-2.11	0.033108	Solyc05g013070.2.1	Kinase family protein (AHRD V1 **** D7KBF8_ARALY)
-2.111	0.025125	Solyc04g082830.2.1	Auxin efflux carrier family protein (AHRD V1 **** D7KJ74_ARALY)
-2.112	0.025134	Solyc06g008310.2.1	Elongator complex protein 2 (AHRD V1 **-- B0X467_CULQU)
-2.117	0.024226	Solyc08g077730.2.1	1-phosphatidylinositol-4-phosphate 5-kinase-like protein (AHRD V1 *--- Q67UY9_ORYSJ)
-2.122	0.046	Solyc04g005120.2.1	Unknown Protein (AHRD V1
-2.122	0.02837	Solyc11g018530.1.1	GO:0005384 "Manganese transport protein mntH (AHRD V1
-2.125	0.024963	Solyc08g066240.2.1	"Decarboxylase family protein (AHRD V1 ***- A7GHE9_CLOBL)
-2.127	0.028786	Solyc02g078580.1.1	Paf1/RNA polymerase II complex (AHRD V1 **-- Q2U0F7_ASPOR)
-2.128	0.025256	Solyc10g074570.1.1	Calcium dependent protein kinase 6 (AHRD V1 **** B9MZ11_POPTR)
-2.128	0.029426	Solyc12g010380.1.1	Adenylate kinase-like protein (AHRD V1 ***- Q8VYL1_ARATH)
-2.129	0.026743	Solyc01g108030.2.1	Methylcrotonoyl-CoA carboxylase beta subunit (AHRD V1 **** D4XQJ0_ACIHA)
-2.13	0.024963	Solyc07g049540.1.1	Expansin-b5 (AHRD V1 ***- D7LRS2_ARALY)
-2.131	0.047786	Solyc05g015040.2.1	ATP-dependent RNA helicase (AHRD V1 **** Q16PT8_AEDAE)
-2.132	0.024333	Solyc09g015930.2.1	ATP-dependent RNA helicase (AHRD V1 **** D3TRA6_GLOMM)
-2.134	0.025733	Solyc10g086710.1.1	PAR-1b protein (AHRD V1 ***- Q43588_TOBAC)
-2.134	0.035502	Solyc08g044280.1.1	"Unknown Protein (AHRD V1)"
-2.135	0.026188	Solyc04g076290.2.1	Os12g0425600 protein (Fragment) (AHRD V1 **-- Q0INN2_ORYSJ)
-2.137	0.025065	Solyc08g076410.2.1	Shikimate kinase-like protein (AHRD V1 **-- B9GZJ5_POPTR)
-2.14	0.026171	Solyc10g055450.1.1	Ubiquitin-protein ligase 4 (AHRD V1 *-*- D7M7X1_ARALY)
-2.141	0.030497	Solyc06g007570.2.1	"40S ribosomal protein S8 (AHRD V1 ***- Q0E158_ORYSJ)
-2.141	0.024964	Solyc06g071780.2.1	"Protein DEHYDRATION-INDUCED 19 homolog 5 (AHRD V1 ***- DI195_
-2.141	0.024703	Solyc05g054740.2.1	High affinity sulfate transporter 2 (AHRD V1 **** SUT2_STYHA)
-2.142	0.03009	Solyc11g044910.1.1	Beta-xylosidase 1 (AHRD V1 ***- D7MNR6_ARALY)
-2.146	0.029153	Solyc09g018670.2.1	"Transmembrane protein 56 (AHRD V1 ***- B6TI82_MAIZE)
-2.146	0.030343	Solyc02g093230.2.1	Caffeoyl-CoA O-methyltransferase (AHRD V1 **** A8IFQ7_SOLLC)
-2.147	0.031255	Solyc07g022920.2.1	BSD domain containing protein expressed (AHRD V1 ***- Q851F1_ORYSJ)
-2.15	0.030574	Solyc12g098490.1.1	Serine hydroxymethyltransferase (AHRD V1 **** D2D306_GOSHI)
-2.151	0.025531	Solyc10g078180.1.1	Cyclin family protein (AHRD V1 *-*- D7MKU7_ARALY)
-2.152	0.023821	Solyc08g078640.1.1	Pectinesterase (AHRD V1 **** D7MP41_ARALY)
-2.16	0.027272	Solyc11g013120.1.1	Protein crcB homolog (AHRD V1 *-*- A4BPZ9_9GAMM)
-2.16	0.034502	Solyc01g080140.2.1	Dolichol-phosphate mannosyltransferase (AHRD V1 **-- C0NU33_AJECG)
-2.161	0.026216	Solyc03g119460.2.1	Cleavage stimulation factor like protein (AHRD V1 ***- Q9M9G6_ARATH)
-2.161	0.027632	Solyc10g086650.1.1	Glyoxal oxidase (AHRD V1 ***- C8CPQ3_VITVI)
-2.166	0.039411	Solyc05g008830.2.1	Octicosapeptide/Phox/Bem1p domain-containing protein (AHRD V1 *--- D7L8F8_ARALY)
-2.169	0.02625	Solyc03g063600.2.1	"Guanylate kinase (AHRD V1 **** Q9FVC6_TOBAC)
-2.174	0.029457	Solyc01g106050.2.1	Dynamin-2 (AHRD V1 ***- D0MQ53_PHYIN)
-2.176	0.031957	Solyc02g092980.2.1	"Cyclin D-like protein (AHRD V1 ***- Q5U8T4_TOBAC)
-2.178	0.025459	Solyc02g088910.2.1	Ninja-family protein 3 (AHRD V1 ***- NNJA3_WHEAT)
-2.178	0.024374	Solyc01g059880.2.1	ATP citrate lyase a-subunit (AHRD V1 **** Q93YH4_LUPAL)
-2.178	0.02286	Solyc03g112630.2.1	Fas-associated factor 1-like protein (AHRD V1 *--- Q5DJU1_CAPAN)
-2.182	0.02833	Solyc02g079590.2.1	Serine/threonine kinase receptor (AHRD V1 **** Q7DMS5_BRANA)
-2.182	0.041327	Solyc02g005350.2.1	Succinyl-CoA ligase (AHRD V1 ***- B9RL91_RICCO)
-2.183	0.031973	Solyc09g042260.2.1	ATP binding / serine-threonine kinase (AHRD V1 **** C5DB71_VITVI)
-2.183	0.026167	Solyc09g065160.2.1	Dynamin family protein (AHRD V1 *--- D0MDN4_RHOM4)
-2.187	0.022512	Solyc02g091290.2.1	"Methionyl-trna formyltransferase (AHRD V1 ***- B9GV84_POPTR)
-2.188	0.042972	Solyc11g072380.1.1	Vicilin-like protein (Fragment) (AHRD V1 **-- Q9SEW4_9ROSI)
-2.19	0.048017	Solyc12g010600.1.1	DNA-directed RNA polymerase (AHRD V1 ***- Q1L5Z1_SOLLC)
-2.191	0.035448	Solyc09g065560.2.1	Sulfate transporter (AHRD V1 **** D7LTZ8_ARALY)
-2.192	0.025733	Solyc01g010860.2.1	Sphingosine hydroxylase (AHRD V1 *--* A8N9Q2_COPC7)
-2.194	0.031167	Solyc06g083350.2.1	Forkhead box K1 (AHRD V1 *--- C1K2Z9_ORYLA)
-2.197	0.021545	Solyc05g047550.2.1	Receptor-like protein kinase (AHRD V1 ***- Q9FZP2_ARATH)
-2.2	0.024144	Solyc06g066740.1.1	Ran binding protein 3 (AHRD V1 *-*- Q6IP83_XENLA)
-2.201	0.023989	Solyc06g071240.1.1	polypeptide feature inferred from GFF3 feature
-2.203	0.036449	Solyc04g049490.2.1	Vacuolar protein sorting-associated protein 53 (AHRD V1 **-- D0NTZ4_PHYIN)
-2.204	0.039543	Solyc09g072610.2.1	Glucose-methanol-choline oxidoreductase (AHRD V1 ***- D6TF66_9CHLR)
-2.205	0.035398	Solyc02g078440.2.1	RNA polymerase II transcription factor B subunit 2 (AHRD V1 **** B2WEG4_PYRTR)
-2.205	0.022877	Solyc05g054570.2.1	CRAL/TRIO domain containing protein expressed (AHRD V1 **-- Q84TA5_ORYSJ)
-2.208	0.028367	Solyc11g011440.1.1	Aspartic proteinase nepenthesin-1 (AHRD V1 **-- B6TS94_MAIZE)
-2.209	0.022054	Solyc09g075990.2.1	"5&apos-nucleotidase surE (AHRD V1 ***- D6YVT2_WADCW)
-2.21	0.020811	Solyc11g071660.1.1	NF-kappa-B-activating protein (AHRD V1 *--- NKAP_HUMAN)
-2.211	0.047112	Solyc04g005310.2.1	"Translin family protein (AHRD V1 ***- D7LQL3_ARALY)
-2.214	0.02652	Solyc03g116040.2.1	Exostosin family-like protein (AHRD V1 **-- Q6Z527_ORYSJ)
-2.215	0.021044	Solyc02g078220.1.1	Unknown Protein (AHRD V1)
-2.216	0.034502	Solyc12g035520.1.1	Calmodulin-binding transcription activator 1 (AHRD V1 *-*- Q0WQF9_ARATH)
-2.217	0.025049	Solyc05g013320.1.1	Pto-like serine/threonine kinase (AHRD V1 **** Q6W0D1_CAPCH)
-2.217	0.024923	Solyc01g011510.2.1	Aldehyde dehydrogenase (AHRD V1 ***- Q71LY7_ORYSI)
-2.217	0.025981	Solyc07g063330.2.1	WD-40 repeat family protein (AHRD V1 ***- D7L4T9_ARALY)
-2.217	0.038587	Solyc06g071280.2.1	Enhanced disease susceptibility 1 (Fragment) (AHRD V1 **-- B2BDU7_ARALY)
-2.222	0.036048	Solyc09g009040.2.1	Delta14-sterol reductase (AHRD V1 **** E1AQY4_SOLLC)
-2.223	0.028964	Solyc11g069360.1.1	Sua5/YciO/YrdC/YwlC family protein (AHRD V1 ***- B1L6Z2_KORCO)
-2.224	0.038331	Solyc02g091990.2.1	"1-aminocyclopropane-1-carboxylate synthase (AHRD V1 **** Q4LD
-2.225	0.022737	Solyc01g090280.2.1	Leucine carboxyl methyltransferase family protein (AHRD V1 **** D7KP37_ARALY)
-2.228	0.031962	Solyc09g082540.2.1	"Tetratricopeptide repeat protein 28 (AHRD V1 *--- TTC28_HUMAN
-2.229	0.034871	Solyc01g008890.2.1	Ethylene responsive transcription factor 2a (AHRD V1 *-*- C0J9I7_9ROSA)
-2.231	0.032906	Solyc09g090970.2.1	"Major allergen Mal d 1 (AHRD V1 ***- Q84LA7_MALDO)
-2.232	0.047977	Solyc08g081330.2.1	"GPN-loop GTPase 1 (AHRD V1 **-- Q4VAB2_MOUSE)
-2.234	0.035458	Solyc02g082220.2.1	Protein transport protein SEC24 (AHRD V1 ***- C5FL43_NANOT)
-2.235	0.046589	Solyc03g112530.2.1	Guanine nucleotide-binding protein G(I)/G(S)/G(T) subunit beta-3 (AHRD V1 **-* GBB3_HUMAN)
-2.236	0.039021	Solyc03g071720.2.1	Phosphatidate cytidylyltransferase family protein expressed (AHRD V1 **-* Q2QYV3_ORYSJ)
-2.237	0.022362	Solyc07g066440.2.1	"Peptidase trypsin-like serine and cysteine proteases (Fragmen
-2.239	0.027703	Solyc03g118610.2.1	Surfeit locus protein 1 (AHRD V1 **-- B5XGV8_SALSA)
-2.241	0.023733	Solyc07g065290.2.1	Zinc finger CCCH domain-containing protein 18 (AHRD V1 ***- C3H18_ARATH)
-2.245	0.040426	Solyc07g062640.2.1	Fiber protein Fb32 (AHRD V1 *-*- Q6UA04_GOSBA)
-2.251	0.02248	Solyc08g080420.2.1	GPI-anchor transamidase component (AHRD V1 *--* Q6KCB9_9SACH)
-2.253	0.023594	Solyc05g053930.2.1	ATP binding / serine-threonine kinase (AHRD V1 **** C5DB71_VITVI)
-2.254	0.022351	Solyc09g065900.2.1	Glutathione reductase (AHRD V1 ***- B9IED0_POPTR)
-2.255	0.022501	Solyc12g005580.1.1	Syntaxin (AHRD V1 ***- Q6X9V9_HORVD)
-2.26	0.01922	Solyc09g075000.2.1	WD repeat protein (AHRD V1 **-- B8M2Y5_TALSN)
-2.261	0.025638	Solyc01g100930.2.1	GDSL esterase/lipase At1g09390 (AHRD V1 ***- GDL2_ARATH)
-2.263	0.030504	Solyc07g032490.2.1	Nitrate transporter (AHRD V1 **** Q9SZY4_ARATH)
-2.267	0.02388	Solyc01g110350.2.1	Unknown Protein (AHRD V1)
-2.267	0.024904	Solyc10g045240.1.1	Beta-glucosidase D4 (AHRD V1 ***- B2ZUU0_LOTJA)
-2.267	0.041103	Solyc02g093970.2.1	Receptor like kinase, RLK GO:0005515,GO:0006468 GO:0004675 GO:0004675,GO:0005515,GO:0006468
-2.269	0.020243	Solyc11g006410.1.1	Genomic DNA chromosome 5 P1 clone MUK11 (AHRD V1 ***- Q9FMC4_ARATH)
-2.274	0.019523	Solyc01g008850.2.1	CBL-interacting protein kinase 18 (AHRD V1 ***- C4P7W7_VITVI)
-2.275	0.04157	Solyc06g071960.2.1	Nucleoside diphosphate kinase (AHRD V1 **** B9RAM1_RICCO)
-2.276	0.023316	Solyc05g049900.2.1	YneE (AHRD V1 **-- D4F0H3_EDWTA)
-2.277	0.022289	Solyc12g006180.1.1	Heterogeneous nuclear ribonucleoprotein A3 (AHRD V1 *--- B6TGB9_MAIZE)
-2.277	0.031878	Solyc04g049690.2.1	Adenylate kinase (AHRD V1 **** B6SLP1_MAIZE)
-2.277	0.041516	Solyc03g026140.2.1	Cytochrome P450 GO:0020037,GO:0055114 GO:0019825 GO:0019825,GO:0020037,GO:0055114
-2.278	0.032063	Solyc08g083310.2.1	Glucan endo-1 3-beta-glucosidase 7 (AHRD V1 ***- B6T478_MAIZE)
-2.281	0.020134	Solyc07g061900.2.1	50S ribosomal protein L4 (AHRD V1 ***- B6TG27_MAIZE)
-2.283	0.019134	Solyc08g068430.2.1	Galactosylgalactosylxylosylprotein 3-beta-glucuronosyltransferase 1 (AHRD V1 **-- B6U0V3_MAIZE)
-2.283	0.028405	Solyc03g097750.2.1	"Translocon-associated protein subunit beta (AHRD V1 *-*- D3BI
-2.284	0.024923	Solyc02g087460.1.1	Receptor like kinase, RLK GO:0005515,GO:0006468 GO:0004675,GO:0042802 GO:0004675,GO:0005515,GO:0006468,GO:0042802
-2.287	0.021733	Solyc10g085330.1.1	Aluminum activated citrate transporter (AHRD V1 **-- A7M6X1_HORVU)
-2.288	0.022103	Solyc10g080710.1.1	Asparaginyl-tRNA synthetase 2 (AHRD V1 **** D7L6K3_ARALY)
-2.289	0.020942	Solyc03g111820.2.1	Sieve element-occluding protein 3 (AHRD V1 **-- B5THF7_MEDTR)
-2.289	0.031893	Solyc11g064890.1.1	GO:0006468,GO:0005488 "Receptor-like kinase (AHRD V1
-2.292	0.019929	Solyc12g014220.1.1	Homology to unknown gene (Fragment) (AHRD V1 *--- Q01G44_OSTTA)
-2.292	0.018655	Solyc10g084770.1.1	Receptor-like protein kinase At3g21340 (AHRD V1 ***- RLK6_ARATH)
-2.294	0.023989	Solyc11g044470.1.1	GO:0003676,GO:0000166 "Heterogeneous nuclear ribonucl
-2.296	0.019286	Solyc10g083640.1.1	Splicing factor U2af subunit (AHRD V1 *-*- B6T3Q5_MAIZE)
-2.297	0.048277	Solyc03g112080.1.1	Manganese-dependent ADP-ribose/CDP-alcohol diphosphatase (AHRD V1 **-- ADPRM_BOVIN)
-2.298	0.019022	Solyc02g090110.2.1	"Receptor-like kinase (AHRD V1 *-** A7VM25_MARPO)
-2.298	0.019832	Solyc06g008110.2.1	WD repeat-containing protein (AHRD V1 **-- C9SVG1_VERA1)
-2.299	0.01895	Solyc09g011480.2.1	Rop guanine nucleotide exchange factor 1 (AHRD V1 ***- ROGF1_ARATH)
-2.299	0.022772	Solyc04g005630.2.1	Mitochondrial transcription termination factor family protein (AHRD V1 **-- D7M3B1_ARALY)
-2.303	0.023563	Solyc01g068460.2.1	Pathogen-induced calmodulin-binding protein (Fragment) (AHRD V1 *-*- Q8H6W8_PHAVU)
-2.303	0.020065	Solyc12g099820.1.1	GO:0048500 "Signal recognition particle protein (AHRD
-2.303	0.024579	Solyc06g076610.2.1	Zinc finger family protein (Fragment) (AHRD V1 *--- D7M766_ARALY)
-2.306	0.025666	Solyc04g064870.2.1	Pathogenesis-related protein-like protein (AHRD V1 ***- Q8L9B0_ARATH)
-2.31	0.032493	Solyc07g049410.2.1	"Dual specificity protein phosphatase 4 (AHRD V1 ***- B6U4B9_M
-2.31	0.017843	Solyc02g080650.2.1	Copper transport protein 86 (AHRD V1 *--- B2G4S5_ZYGRO)
-2.31	0.030643	Solyc01g058530.2.1	30S ribosomal protein S18 family (AHRD V1 *-*- D7KH00_ARALY)
-2.31	0.030513	Solyc04g077470.2.1	Cellulose synthase-like C1-2 glycosyltransferase family 2 protein (AHRD V1 **** D8T077_SELML)
-2.31	0.03701	Solyc11g013480.1.1	Auxin response factor 3 (AHRD V1 ***- A4L9W4_GOSHI)
-2.312	0.023615	Solyc08g077290.1.1	DnaJ homolog subfamily C member 2 (AHRD V1 *--- DNJC2_MACFA)
-2.314	0.02763	Solyc03g121050.2.1	Receptor-like kinase (AHRD V1 *-*- C0SW32_SOYBN)
-2.314	0.024579	Solyc12g096770.1.1	Hydroxycinnamoyl CoA quinate transferase (AHRD V1 **-- D6BK25_CYNSC)
-2.314	0.045424	Solyc09g092270.2.1	"Hydroxycinnamoyl-CoA shikimate/quinate hydroxycinnamoyl trans
-2.315	0.018958	Solyc02g067120.2.1	Genomic DNA chromosome 5 P1 clone MUL8 (AHRD V1 ***- Q9FLY2_ARATH)
-2.323	0.043187	Solyc03g005350.2.1	BHLH transcription factor (AHRD V1 **** B6U846_MAIZE)
-2.324	0.046888	Solyc02g062340.2.1	Fructose-bisphosphate aldolase (AHRD V1 ***- Q9SXX4_NICPA)
-2.324	0.020877	Solyc03g082960.2.1	Serine/threonine phosphatase family protein (AHRD V1 **** C1E0J1_9CHLO)
-2.325	0.047908	Solyc00g171810.2.1	ATP synthase subunit a (AHRD V1 ***- Q45KQ5_CAPAN)
-2.326	0.021592	Solyc03g083910.2.1	Acid beta-fructofuranosidase (AHRD V1 **-- Q575T1_WHEAT)
-2.328	0.023971	Solyc02g065630.2.1	Myosin-like protein (AHRD V1 *--- Q9C717_ARATH)
-2.332	0.023989	Solyc02g072130.2.1	Protein transport protein SEC61 alpha subunit (AHRD V1 ***- D3B1K5_POLPA)
-2.334	0.033665	Solyc02g068790.2.1	Lactosylceramide 4-alpha-galactosyltransferase (AHRD V1 *-*- A4GAT_MOUSE)
-2.334	0.019614	Solyc09g075440.2.1	Ethylene receptor (AHRD V1 **** Q41341_SOLLC)
-2.334	0.026718	Solyc05g006950.2.1	Conserved oligomeric Golgi complex subunit 7 (AHRD V1 ***- COG7_MOUSE)
-2.335	0.022168	Solyc06g030540.2.1	Unknown Protein (AHRD V1)
-2.335	0.023339	Solyc01g097270.2.1	Chitinase (Fragment) (AHRD V1 *--- Q38777_ALLSA)
-2.34	0.030943	Solyc08g067050.2.1	Arginine N-methyltransferase family protein (AHRD V1 ***- D7KE86_ARALY)
-2.341	0.017662	Solyc04g008340.2.1	Zinc transporter (AHRD V1 *-*- B0WKX7_CULQU)
-2.341	0.034871	Solyc03g082790.2.1	Extensin-like protein Dif54 (AHRD V1 *-*- Q43505_SOLLC
-2.342	0.017662	Solyc02g089900.1.1	Receptor-like kinase (AHRD V1 *-*- A7VM35_MARPO)
-2.346	0.027324	Solyc06g061030.2.1	Two-component response regulator ARR11 (AHRD V1 *-*- B6UC09_MAIZE)
-2.348	0.042306	Solyc06g035530.2.1	"Gibberellin 20-oxidase-2 (AHRD V1 **** Q9ZPP3_SOLLC)
-2.353	0.030935	Solyc02g064550.2.1	C1orf93 homolog (AHRD V1 **-- C1C416_RANCA)
-2.355	0.044858	Solyc10g085600.1.1	F-box/LRR-repeat protein 4 (AHRD V1 *-*- FBL4_ARATH)
-2.362	0.018188	Solyc06g068760.2.1	CRUMPLED LEAF (AHRD V1 ***- Q9FI46_ARATH);
-2.362	0.016283	Solyc07g051850.2.1	Aspartic proteinase (AHRD V1 **-* Q96383_CENCA)
-2.363	0.030256	Solyc12g005860.1.1	3-isopropylmalate dehydratase large subunit (AHRD V1 *--- LEUC_BACWK)
-2.365	0.033703	Solyc04g081960.1.1	Syringolide-induced protein 14-1-1 (Fragment) (AHRD V1 *-*- Q06H38_ARAHY)
-2.366	0.026461	Solyc06g072120.2.1	"40S ribosomal protein SA (AHRD V1 ***- B4G194_MAIZE)
-2.367	0.020413	Solyc12g042570.1.1	Serine/threonine protein phosphatase (AHRD V1 **** C1MNQ4_MICPS)
-2.368	0.022072	Solyc08g005970.2.1	Protein arginine N-methyltransferase (AHRD V1 **** A9T4F9_PHYPA)
-2.368	0.017478	Solyc01g087600.2.1	Protein E03H4.4 partially confirmed by transcript evidence (AHRD V1 *-*- O17744_CAEEL)
-2.371	0.018941	Solyc01g103230.2.1	Non-lysosomal glucosylceramidase (AHRD V1 ***- B9SS77_RICCO)
-2.371	0.017343	Solyc01g059870.2.1	Phytochrome B1 GO:0005515,GO:0005524,GO:0006355,GO:0007165,GO:0009401,GO:0016020,GO:0018106,GO:0018298,GO:0045449 GO:0009883,GO:0042802 GO:0005515,GO:0005524,GO:0006355,GO:0007165,GO:0009401,GO:0009883,GO:0016020,GO:0018106,GO:0018298,GO:0042802,GO:0045449
-2.375	0.021608	Solyc05g041700.1.1	"Unknown Protein (AHRD V1)"
-2.377	0.022001	Solyc03g007670.2.1	SGT1 (AHRD V1 **-- Q2HPC2_SOLTU)
-2.379	0.017071	Solyc06g084010.2.1	Os03g0627500 protein (Fragment) (AHRD V1 *--- Q0DQ67_ORYSJ)
-2.381	0.028202	Solyc07g007600.2.1	Pyrophosphate-energized proton pump (AHRD V1 ***- B0SRX3_LEPBP)
-2.382	0.044495	Solyc08g022110.2.1	Light-inducible protein CPRF2 (AHRD V1 ***- CPRF2_PETCR)
-2.384	0.016032	Solyc01g091270.2.1	AT2G45380 protein (Fragment) (AHRD V1 ***- B9DGW8_ARATH)
-2.388	0.016752	Solyc03g044790.2.1	Alpha-hydroxynitrile lyase (AHRD V1 **-- O49897_MANES)
-2.388	0.017466	Solyc03g095620.2.1	ABC-1 domain protein (AHRD V1 **-- A1TWJ2_MARAV)
-2.389	0.023989	Solyc01g104130.2.1	Oxidoreductase 2OG-Fe(II) oxygenase family protein-like (AHRD V1 *--- Q5VPG6_ORYSJ)
-2.392	0.017123	Solyc01g095140.2.1	"Late embryogenesis abundant protein (Fragment) (AHRD V1 **--
-2.392	0.020914	Solyc06g060780.2.1	"Phosphatidylserine decarboxylase proenzyme (AHRD V1 **** B6K4
-2.393	0.017121	Solyc02g076680.2.1	Unknown Protein (AHRD V1)
-2.395	0.016343	Solyc01g091600.2.1	RING finger family protein (AHRD V1 *-*- D6RU92_SILLA)
-2.4	0.022194	Solyc05g050370.1.1	Unknown Protein (AHRD V1)
-2.401	0.025002	Solyc06g054690.2.1	Transposon protein CACTA En/Spm sub-class (AHRD V1 *--- B6SWV7_MAIZE)
-2.403	0.017373	Solyc06g072720.2.1	Zinc finger CCCH domain-containing protein 56 (AHRD V1 ***- C3H56_ORYSJ)
-2.404	0.020636	Solyc04g051200.1.1	Alpha-1 4-glucan-protein synthase (AHRD V1 **-- B9RFU2_RICCO)
-2.405	0.019132	Solyc07g007220.2.1	Serine/threonine phosphatase family protein (AHRD V1 **** C1E0J1_9CHLO)
-2.406	0.017392	Solyc02g092920.2.1	Cadmium-transporting ATPase (AHRD V1 ***- Q5WLE3_BACSK)
-2.406	0.018896	Solyc02g094510.2.1	Ring finger protein 10 (AHRD V1 *-*- Q6P1V6_XENTR)
-2.407	0.014912	Solyc08g065990.2.1	Cytosolic Fe-S cluster assembly factor NAR1 (AHRD V1 ***- NAR1_YARLI)
-2.408	0.031444	Solyc06g052070.2.1	WD-40 repeat family protein (AHRD V1 ***- D7MSZ0_ARALY)
-2.412	0.018655	Solyc10g005850.2.1	Genomic DNA chromosome 3 P1 clone MJH23 (AHRD V1 *-*- Q9LHL0_ARATH)
-2.416	0.023202	Solyc01g098230.2.1	Mitochondrial import inner membrane translocase subunit TIM44 (AHRD V1 ***- D7L3P3_ARALY)
-2.416	0.041255	Solyc10g007440.2.1	Zinc finger (Ran-binding) family protein (AHRD V1 *--- D7KYC9_ARALY)
-2.417	0.029789	Solyc01g066940.2.1	Vesicle-associated membrane protein 7B (AHRD V1 ***- D7KE73_ARALY)
-2.421	0.01662	Solyc05g005980.2.1	Solute carrier family 15 member 4 (AHRD V1 **-- S15A4_XENLA)
-2.421	0.035782	Solyc02g067210.2.1	Nucleic acid binding protein (AHRD V1 **-* B6UDK8_MAIZE)
-2.422	0.020602	Solyc01g109720.2.1	Hydrolase-like (AHRD V1 ***- Q5VNP5_ORYSJ)
-2.422	0.049909	Solyc01g090690.2.1	Elongation factor G (AHRD V1 ***- B0SNI8_LEPBP)
-2.423	0.022524	Solyc09g090020.2.1	Germin-like protein 5 (AHRD V1 ***- A8QK91_VITVI)
-2.43	0.016223	Solyc07g065890.2.1	Uridine kinase (AHRD V1 **** B9N5N9_POPTR)
-2.433	0.014638	Solyc02g082470.2.1	Serine threonine-protein kinase (AHRD V1 *-*- Q16QF5_AEDAE)
-2.438	0.014644	Solyc03g058910.2.1	Pectate lyase (AHRD V1 **** B6TPL1_MAIZE)
-2.438	0.018503	Solyc05g042120.2.1	Unknown Protein (AHRD V1)
-2.439	0.032658	Solyc03g007090.1.1	At5g51670-like protein (Fragment) (AHRD V1 *-*- C0JEX1_9BRAS)
-2.439	0.045851	Solyc04g008900.2.1	Fgenesh protein 60 (AHRD V1 **-- Q1ZY19_BETVU);
-2.442	0.01635	Solyc03g083730.1.1	Pectinesterase (AHRD V1 ***- C0PST8_PICSI)
-2.448	0.031009	Solyc12g056790.1.1	NAC domain protein IPR003441 (AHRD V1 ***- B9GT49_POPTR)
-2.452	0.032658	Solyc09g059340.1.1	"Unknown Protein (AHRD V1)"
-2.453	0.014902	Solyc07g052730.2.1	Formin 3 (AHRD V1 *-*- D0QAN4_ARATH)
-2.453	0.016651	Solyc01g112140.2.1	Dimethylaniline monooxygenase 5 (AHRD V1 **** B5X0U9_SALSA)
-2.454	0.017662	Solyc02g085870.2.1	Fatty acid elongase 3-ketoacyl-CoA synthase (AHRD V1 **** Q6DUV5_BRANA)
-2.455	0.024123	Solyc08g081410.2.1	General vesicular transport factor p115 (AHRD V1 *--- B0WXD3_CULQU)
-2.459	0.015094	Solyc06g063250.2.1	Cation diffusion facilitator family transporter (AHRD V1 **** D0LPV3_HALO1)
-2.459	0.020596	Solyc01g111160.2.1	Unknown Protein (AHRD V1)
-2.46	0.037233	Solyc06g051410.2.1	N-(5&apos-phosphoribosyl)anthranilate isomerase (AHRD V1 **** B9SQM9_RICCO)
-2.464	0.042622	Solyc03g013590.1.1	"Unknown Protein (AHRD V1)"
-2.464	0.047824	Solyc01g097030.2.1	Mutator-like transposase (AHRD V1 ***- Q9SR14_ARATH)
-2.465	0.017598	Solyc09g075260.2.1	POT family domain containing protein expressed (AHRD V1 ***- D8L9H8_WHEAT)
-2.465	0.016727	Solyc03g112230.2.1	ZZ type zinc finger domain-containing protein (Fragment) (AHRD V1 *--- C1GFD2_PARBD)
-2.466	0.016855	Solyc09g018220.1.1	Cc-nbs-lrr, resistance protein GO:0006915,GO:0006952,GO:0017111 GO:0005515 GO:0005515,GO:0006915,GO:0006952,GO:0017111
-2.467	0.019842	Solyc05g013780.2.1	Unknown Protein (AHRD V1)
-2.469	0.032784	Solyc02g080050.1.1	"Cysteine-rich receptor-like protein kinase (AHRD V1 ***- C6ZR
-2.47	0.015745	Solyc03g098280.2.1	ARGONAUTE 1 (AHRD V1 ***- D6RUV9_TOBAC)
-2.47	0.019137	Solyc07g042510.2.1	Transmembrane BAX inhibitor motif-containing protein 4 (AHRD V1 **-- B6TGH7_MAIZE)
-2.47	0.025735	Solyc06g036720.2.1	HLA-B associated transcript 3 (Fragment) (AHRD V1 *--- Q5STC0_HUMAN)
-2.472	0.014026	Solyc05g009920.2.1	Anion-transporting ATPase (AHRD V1 ***- B0JG18_MICAN)
-2.474	0.017812	Solyc02g086970.2.1	Aldehyde dehydrogenase 1 (AHRD V1 **** Q84V96_LOTCO)
-2.475	0.025538	Solyc03g121460.1.1	GO:0005515 "Prenylated rab acceptor PRA1 (AHRD V1 ***
-2.476	0.014525	Solyc07g017960.2.1	Unknown Protein (AHRD V1)
-2.479	0.013684	Solyc10g081710.1.1	RING finger protein 43 (AHRD V1 *-*- RNF43_HUMAN)
-2.479	0.016223	Solyc11g020100.1.1	Cc-nbs-lrr, resistance protein GO:0006915,GO:0006952 GO:0006915,GO:0006952
-2.482	0.013773	Solyc01g010870.2.1	Dehydration-responsive family protein (AHRD V1 ***- D7KPN7_ARALY)
-2.486	0.01393	Solyc03g117440.2.1	ATP dependent RNA helicase (AHRD V1 **** B3LNW9_YEAS1)
-2.491	0.024894	Solyc07g043160.1.1	UDP-glucosyltransferase (AHRD V1 **** A7M6U9_IPONI)
-2.493	0.022057	Solyc03g114760.2.1	TMV-MP30 binding protein 2C (AHRD V1 **-* Q8S556_TOBAC) GO:0005515 GO:0005515
-2.496	0.024598	Solyc01g103040.2.1	Mitotic checkpoint protein MAD1 (AHRD V1 *-*- A8JF64_CHLRE)
-2.499	0.015683	Solyc11g071320.1.1	GO:0005840 "50S ribosomal protein L27 (AHRD V1 ***- B
-2.504	0.019245	Solyc12g049070.1.1	"Extensin-like protein Ext1 (AHRD V1 ***- Q8VWM5_SOLLC)"
-2.511	0.013774	Solyc02g021760.2.1	mRNA 3&apos-end-processing protein yth1 (AHRD V1 *--- B2WC08_PYRTR)
-2.513	0.030346	Solyc03g033620.2.1	Serine carboxypeptidase S28 family protein (AHRD V1 **-* D7MBN8_ARALY)
-2.515	0.017154	Solyc02g081380.2.1	Ras-related protein Rab-5C (AHRD V1 ***- C1BU54_9MAXI)
-2.515	0.045103	Solyc04g079530.2.1	Solute carrier family 15 member 4 (AHRD V1 **-- S15A4_BOVIN)
-2.519	0.031584	Solyc11g011250.1.1	Chloride intracellular channel 6 (AHRD V1 ***- B6UCX2_MAIZE)
-2.519	0.017763	Solyc04g054820.2.1	2 3-bisphosphoglycerate-dependent phosphoglycerate mutase (AHRD V1 **** D1R850_9CHLA)
-2.52	0.018268	Solyc03g119740.2.1	MYB transcription factor (AHRD V1 **** Q9FNN6_ARATH)
-2.524	0.013129	Solyc09g007190.2.1	C1orf93 homolog (AHRD V1 **-- B5X9L9_SALSA)
-2.526	0.043498	Solyc12g055790.1.1	Heterogeneous nuclear ribonucleoprotein K (AHRD V1 *--- Q6P363_XENTR)
-2.528	0.013718	Solyc10g084370.1.1	MYB transcription factor (Fragment) (AHRD V1 **-- A1DR87_CATRO)
-2.528	0.025053	Solyc02g085160.1.1	Zinc finger-homeodomain protein 1 (Fragment) (AHRD V1 **-- B0LK17_YUCFI)
-2.53	0.013629	Solyc02g089620.2.1	"Proline dehydrogenase (AHRD V1 **** A1E289_ACTDE)
-2.532	0.030184	Solyc08g075860.2.1	Os06g0115800 protein (Fragment) (AHRD V1 *-*- Q0DF43_ORYSJ)
-2.536	0.015679	Solyc05g009600.2.1	Phosphatase 2A regulatory A subunit (AHRD V1 **** Q9S7C5_ORYSA)
-2.539	0.0216	Solyc08g014340.2.1	Cysteine synthase (AHRD V1 **** Q9FS26_SOLTU)
-2.541	0.015854	Solyc11g008250.1.1	Single-stranded nucleic acid binding R3H domain protein (AHRD V1 **-- B4B323_9CHRO)
-2.543	0.022351	Solyc07g043230.2.1	Low affinity zinc transporter (AHRD V1 **** A3LU47_PICST)
-2.549	0.01711	Solyc09g042750.2.1	"Acyl-CoA thioesterase 9 (AHRD V1 **** Q503Q9_DANRE)"
-2.551	0.024283	Solyc09g008610.2.1	KIAA0090 homolog (AHRD V1 **-- B5X182_SALSA)
-2.554	0.017577	Solyc04g007460.2.1	Octicosapeptide/Phox/Bem1p domain-containing protein (AHRD V1 *--- D7L8F8_ARALY)
-2.557	0.023292	Solyc06g009530.2.1	Nodal modulator 3 (AHRD V1 ***- B0XK54_CULQU)
-2.558	0.047177	Solyc06g051930.2.1	Pyruvate kinase family protein (AHRD V1 ***- D7LSF1_ARALY)
-2.56	0.012015	Solyc06g008130.2.1	domain protein SUVR2 (AHRD V1 ***- D7MN45_ARALY)
-2.56	0.012027	Solyc01g096850.2.1	Protein FAR1-RELATED SEQUENCE 3 (AHRD V1 ***- FRS3_ARATH)
-2.562	0.016013	Solyc05g056220.2.1	Methyltransferase like 3 (AHRD V1 *-** Q28H22_XENTR)
-2.565	0.019888	Solyc03g120890.2.1	GATA transcription factor 9 (AHRD V1 *-*- B6STZ1_MAIZE)
-2.567	0.015683	Solyc01g080360.2.1	MHD domain-containing death-inducing protein (AHRD V1 *--- MUDEN_HUMAN)
-2.567	0.034168	Solyc09g065130.2.1	Mitochondrial Rho GTPase 1 (AHRD V1 **** B2WA10_PYRTR)
-2.573	0.014918	Solyc08g075540.2.1	Alternative oxidase (AHRD V1 **** Q84V47_SOLLC)
-2.577	0.011916	Solyc09g066470.2.1	Cobalt import ATP-binding protein CbiO 2 (AHRD V1 ***- CBIO2_STRPF)
-2.58	0.011477	Solyc01g080110.2.1	SNARE associated Golgi protein (AHRD V1 **-- C7LQY4_DESBD)
-2.582	0.012604	Solyc08g075520.2.1	Binding protein (AHRD V1 ***- D7MGU4_ARALY)
-2.583	0.012782	Solyc03g063890.1.1	&aposchromo&apos domain containing protein (AHRD V1 *-*- Q6L3Q3_SOLDE)
-2.586	0.013867	Solyc08g081310.2.1	Os10g0358600 protein (Fragment) (AHRD V1 ***- Q0IY80_ORYSJ)
-2.586	0.011477	Solyc02g087900.2.1	Cullin C (AHRD V1 ***- D3BHJ6_POLPA)
-2.586	0.025125	Solyc06g053370.1.1	GO:0016021 "Rhomboid domain-containing protein (AHRD
-2.587	0.012142	Solyc07g049560.2.1	"Tyrosine phosphatase family protein (AHRD V1 **** B8N9Z8_ASPF
-2.587	0.014091	Solyc10g009050.2.1	Os11g0198100 protein (Fragment) (AHRD V1 *--- Q0IU20_ORYSJ)
-2.596	0.012838	Solyc03g005010.2.1	Uncharacterized RNA methyltransferase (AHRD V1 ***- C3BFC5_9BACI)
-2.597	0.040212	Solyc07g055860.2.1	"Serine/threonine-protein phosphatase 5 (AHRD V1 **** B6TKH0_M
-2.602	0.024024	Solyc02g083760.2.1	Thaumatin-like protein (AHRD V1 ***- Q9STX6_ARATH)
-2.603	0.029604	Solyc02g087730.2.1	Katanin p80 WD40-containing subunit B1 (AHRD V1 *--- KTNB1_XENTR);
-2.603	0.039352	Solyc03g120270.2.1	Coatomer beta&apos subunit (AHRD V1 ***- C5FJ65_NANOT)
-2.604	0.011944	Solyc10g009080.2.1	"Squamosa promoter binding-like protein (AHRD V1 ***- Q0PY35_S
-2.605	0.012027	Solyc05g056010.2.1	Serine/threonine-protein phosphatase (Fragment) (AHRD V1 **-- D7U0L7_VITVI)
-2.606	0.012825	Solyc05g050230.2.1	Ubiquitin-conjugating enzyme E2 10 (AHRD V1 **** UBC10_ARATH)
-2.608	0.013802	Solyc10g083840.1.1	"FluG protein (AHRD V1 ***- C4JDZ6_UNCRE)"
-2.611	0.026451	Solyc12g014210.1.1	RNA binding protein (AHRD V1 **-* B6TJJ4_MAIZE)
-2.612	0.020216	Solyc12g014620.1.1	GO:0006869 "Cortical cell-delineating protein (AHRD V
-2.612	0.011639	Solyc12g096490.1.1	GDU1 (AHRD V1 *-*- B6TY22_MAIZE)
-2.614	0.026236	Solyc01g011040.2.1	LRR receptor-like serine/threonine-protein kinase, RLP
-2.614	0.011716	Solyc11g017140.1.1	C2-H2 zinc finger protein (AHRD V1 ***- B0YR09_SOYBN)
-2.615	0.022206	Solyc06g053560.2.1	Serine/threonine kinase (AHRD V1 **** D8UCQ6_VOLCA)
-2.617	0.032543	Solyc01g091950.2.1	1-acylglycerophosphocholine O-acyltransferase 1 (AHRD V1 **** PCAT1_DROME)
-2.625	0.015468	Solyc01g102760.2.1	finger family protein (AHRD V1 ***- D7KBK9_ARALY)"
-2.625	0.012593	Solyc09g075130.2.1	"Small nuclear ribonucleoprotein-like protein (AHRD V1 ***- Q8
-2.627	0.014249	Solyc02g067520.2.1	Unknown Protein (AHRD V1)
-2.627	0.015146	Solyc03g121920.2.1	"Mitochondrial carrier-like protein (AHRD V1 ***- Q8L9F8_ARATH
-2.627	0.017262	Solyc10g049210.1.1	Serine carboxypeptidase 1 (AHRD V1 ***- B6TG69_MAIZE)
-2.628	0.042659	Solyc08g029220.1.1	Chaperone protein dnaJ 49 (AHRD V1 *-*- DNJ49_ARATH)
-2.63	0.010827	Solyc10g006760.2.1	Universal stress protein (Usp) (AHRD V1 *--- A2Q2X4_MEDTR)
-2.632	0.031747	Solyc02g082180.2.1	DNA replication licensing factor (AHRD V1 ***- Q2TWS7_ASPOR)
-2.633	0.013461	Solyc09g092390.2.1	"Adenosylhomocysteinase (AHRD V1 **** Q2XTD0_SOLTU)
-2.639	0.015374	Solyc09g011160.2.1	Regulator of chromosome condensation RCC1 (AHRD V1 *--- B8FLG8_DESAA)
-2.645	0.011141	Solyc08g079900.1.1	Subtilisin-like protease (AHRD V1 **-- Q9LWA4_SOLLC)
-2.646	0.026862	Solyc12g055820.1.1	GO:0045551 "Cinnamyl alcohol dehydrogenase (AHRD V1 *
-2.646	0.023394	Solyc06g062500.2.1	"60S ribosomal protein L28 (AHRD V1 ***- B3TLS3_ELAGV)
-2.658	0.01189	Solyc06g053960.2.1	"Heat stress transcription factor A3 (AHRD V1 ***- D1M7W9_SOLL
-2.66	0.01289	Solyc05g013270.1.1	polypeptide feature inferred from GFF3 feature
-2.66	0.040694	Solyc01g111930.2.1	Rop guanine nucleotide exchange factor 1 (AHRD V1 **-* ROGF1_ARATH)
-2.665	0.013007	Solyc06g072580.2.1	Pyruvate dehydrogenase E1 component subunit beta (AHRD V1 **-* B6T6H3_MAIZE)
-2.675	0.011306	Solyc06g074390.2.1	Fatty acyl coA reductase (AHRD V1 **** Q8L4M0_WHEAT)
-2.676	0.010392	Solyc01g008710.2.1	Mannan endo-1 4-beta-mannosidase (AHRD V1 ***- D2S259_HALTV)
-2.679	0.016571	Solyc10g044630.1.1	DUF803 domain membrane protein (AHRD V1 **-- C1GHB7_PARBD)
-2.679	0.018911	Solyc02g090970.1.1	Serine/threonine-protein kinase 24 (AHRD V1 **** STK24_MOUSE)
-2.68	0.01105	Solyc11g062130.1.1	GO:0016020,GO:0005743 "Mitochondrial ADP/ATP carrier
-2.68	0.013375	Solyc11g010590.1.1	"Protein-tyrosine phosphatase-like member A (AHRD V1 ***- PTPL
-2.681	0.013377	Solyc01g111060.2.1	5&apos-methylthioadenosine/S-adenosylhomocysteine nucleosidase (AHRD V1 **** D4FIY6_STAEP)
-2.682	0.00981	Solyc07g062450.2.1	RAB3 GTPase activating protein subunit 2 (Non-catalytic) (AHRD V1 ***- A6H8V0_HUMAN)
-2.683	0.011801	Solyc05g032660.2.1	Dehydrogenase/ reductase 3 (AHRD V1 *--* Q3INM6_NATPD)
-2.683	0.016395	Solyc08g079430.2.1	Primary amine oxidase (AHRD V1 ***- B9RBR2_RICCO)
-2.687	0.009935	Solyc10g005860.2.1	Unknown Protein (AHRD V1)
-2.689	0.015144	Solyc03g120760.2.1	Receptor-like protein kinase At3g21340 (AHRD V1 *-** RLK6_ARATH)
-2.691	0.024767	Solyc04g054690.2.1	Laccase 1a (AHRD V1 ***- B9IG56_POPTR)
-2.694	0.017154	Solyc04g071750.2.1	Tubby-like F-box protein 5 (AHRD V1 ***- TLP5_ORYSJ)
-2.698	0.012169	Solyc02g068080.2.1	Voltage-gated chloride channel (AHRD V1 **** Q96325_ARATH)
-2.699	0.049829	Solyc03g123800.1.1	Mitogen-activated protein kinase kinase (AHRD V1 ***- Q7XAC9_SOLTU)
-2.702	0.012773	Solyc06g051800.2.1	Expansin (AHRD V1 ***- O04359_SOLLC)
-2.703	0.012832	Solyc06g051230.2.1	RING finger protein 5 (AHRD V1 *-*- B6TI40_MAIZE)
-2.703	0.015456	Solyc01g079760.2.1	Mitochondrial carrier protein (AHRD V1 ***- C5P0Z3_COCP7)
-2.708	0.012597	Solyc06g065840.2.1	Trafficking protein particle complex subunit 9 (AHRD V1 **-- TPPC9_BOVIN)
-2.714	0.042686	Solyc01g005160.2.1	U-box domain-containing protein (AHRD V1 ***- D7MID4_ARALY)
-2.727	0.018552	Solyc07g017230.2.1	Receptor like kinase, RLK GO:0005515,GO:0006468 GO:0004674 GO:0004674,GO:0005515,GO:0006468
-2.727	0.026534	Solyc01g007340.2.1	"Acetyl-coenzyme A carboxylase carboxyl transferase subunit be
-2.728	0.029252	Solyc02g082550.2.1	Kinase family protein (AHRD V1 ***- D7MD00_ARALY)
-2.729	0.035013	Solyc02g084700.2.1	MORC family CW-type zinc finger 3 (AHRD V1 *--- Q4VBZ9_HUMAN)
-2.73	0.016485	Solyc03g115300.1.1	Expansin (AHRD V1 ***- Q7X9Q3_SAMNI)
-2.73	0.018898	Solyc01g102350.2.1	Pectinacetylesterase like protein (Fragment) (AHRD V1 *--- Q56WP8_ARATH)
-2.735	0.012701	Solyc01g010660.2.1	Receptor-like protein kinase At3g21340 (AHRD V1 **** RLK6_ARATH)
-2.735	0.045129	Solyc09g009560.1.1	SELF PRUNING 9D GO:0008429 GO:0008429
-2.74	0.009082	Solyc07g053670.2.1	Unknown Protein (AHRD V1)
-2.742	0.019228	Solyc03g095780.1.1	GO:0004872,GO:0042803 "Abscisic acid receptor PYL6 (A
-2.749	0.017794	Solyc03g114920.1.1	Pentatricopeptide repeat-containing protein (AHRD V1 ***- D7MUF9_ARALY)
-2.752	0.028727	Solyc03g097780.2.1	Alpha-2 3-sialyltransferase (AHRD V1 *-*- Q702S2_TAKRU)
-2.757	0.025601	Solyc11g069170.1.1	Transmembrane protein 209 (AHRD V1 *-*- TM209_MOUSE)
-2.765	0.009108	Solyc03g043760.2.1	Expressed protein (Fragment) (AHRD V1 *-*- Q53MP6_ORYSJ)
-2.775	0.028252	Solyc09g098530.2.1	Unknown Protein (AHRD V1)
-2.776	0.014578	Solyc06g071210.2.1	Ribosomal protein S6 kinase 2 alpha (AHRD V1 **** KS6AA_CHICK)
-2.778	0.014901	Solyc04g079520.2.1	Peptide transporter (AHRD V1 **-* A6YJX4_9MAGN)
-2.779	0.009424	Solyc03g083430.2.1	Splicing factor 3a subunit 3 (AHRD V1 ***- D8TLN4_VOLCA)
-2.78	0.021311	Solyc09g075910.1.1	Receptor-like protein kinase (AHRD V1 ***- Q39202_ARATH)
-2.785	0.033665	Solyc07g053560.2.1	Genomic DNA chromosome 5 P1 clone MLN1 (AHRD V1 *-*- Q9FFH4_ARATH)
-2.786	0.015362	Solyc01g073820.2.1	CHP-rich zinc finger protein-like (AHRD V1 **-- Q9FNE5_ARATH)
-2.791	0.014799	Solyc07g044860.2.1	Oxygen-evolving enhancer protein 2, chloroplastic (AHRD V1 ***- PSBP_SOLLC)
-2.798	0.013586	Solyc02g094360.2.1	Regulation of nuclear pre-mRNA domain containing 1B (AHRD V1 *-*- B5DEK0_RAT)
-2.803	0.027605	Solyc02g094280.2.1	Oligopeptide transporter (Fragment) (AHRD V1 **** B0DAK3_LACBS)
-2.806	0.011801	Solyc06g050520.1.1	polypeptide feature inferred from GFF3 feature
[truncated: 319 more rows]

## Sheet: P+HA+R RAW DATA
A	Coef	t	p.value	p.value.adj	F	F.p.value	ID
9.15	-4384	-7.59	2e-05	0.00151	57.54	2e-05	D86239 _673_40_S
11.27	-1149	-1.93	0.08348	0.171449	3.74	0.08348	NP000012_419_39_S
9.62	-0.63	-0.95	0.3648	0.503769	0.91	0.3648	NP000037_1009_35_S
8.53	1629	2.57	0.02892	0.08026	6.6	0.02892	NP000066_643_40_X4
8.44	-1313	-2.24	0.05033	0.119032	5.01	0.05033	NP000077_1308_40_S
10.27	-0.502	-0.85	0.41424	0.551177	0.73	0.41424	NP000092_1143_40_S
7.98	0.233	0.34	0.74029	0.826412	0.12	0.74029	NP000098_229_41_S
9.88	-0.945	-1.58	0.14744	0.260237	2.49	0.14744	NP000099_1696_37_X5
8.4	-2371	-4.04	0.00261	0.017343	16.31	0.00261	NP000100_40_41_X6
7.59	-2.73	-4.09	0.00241	0.016485	16.74	0.00241	NP000109_446_35_S
9.61	-1328	-2.28	0.04669	0.112768	5.22	0.04669	NP000114_2508_35_S
7.65	0.213	0.3	0.7729	0.849696	0.09	0.7729	NP000122_1061_40_S
9.61	3956	6.43	9e-05	0.002739	41.35	9e-05	NP000123_39_41_S
9.49	3027	4.6	0.00112	0.010556	21.13	0.00112	NP000143_1100_40_S
8.95	-1151	-1.41	0.19089	0.314686	1.98	0.19089	NP000147_214_41_S
7.48	-1573	-2	0.07484	0.158077	4	0.07484	NP000183_734_39_S
12.09	-0.31	-0.44	0.67256	0.77409	0.19	0.67256	NP000192_534_37_X2
8.09	-0.492	-0.85	0.41798	0.555095	0.72	0.41798	NP000223_377_35_S
10.3	-1624	-2.68	0.02417	0.070661	7.16	0.02417	NP000226_315_35_S
6.89	0.15	0.2	0.84843	0.902831	0.04	0.84843	NP000227_240_35_S
7.45	-2341	-3.32	0.00823	0.034871	11.04	0.00823	NP000231_1302_40_S
8.27	-0.368	-0.58	0.57279	0.692853	0.34	0.57279	NP000323_17_41_S
8.29	0.738	1.18	0.26548	0.400909	1.4	0.26548	NP000336_954_40_S
7.49	-0.487	-0.74	0.4774	0.610351	0.55	0.4774	NP000339_360_40_S
10.45	-0.211	-0.28	0.78877	0.86195	0.08	0.78877	NP000341_408_40_X3
7.74	0.988	1.69	0.12282	0.227525	2.87	0.12282	NP000351_559_40_S
11	2124	3.63	0.00502	0.025733	13.15	0.00502	NP000364_293_37_X2
10.67	-2032	-3.43	0.0069	0.031462	11.77	0.0069	NP000406_116_35_S
8.44	-1077	-1.61	0.14027	0.25079	2.59	0.14027	NP000408_323_35_S
9.23	-0.556	-0.88	0.39841	0.53599	0.78	0.39841	NP000412_1521_37_S
9.88	-0.628	-0.83	0.42515	0.561937	0.69	0.42515	NP000418_30_37_S
10.89	6852	11.69	0	0.000579	136.75	0	NP000423_437_37_X2
9.2	-1639	-1.85	0.09512	0.18881	3.43	0.09512	NP000566_2239_40_S
9.98	-1791	-2.44	0.03567	0.09295	5.98	0.03567	NP000567_4581_35_S
7.16	-1597	-2.41	0.03771	0.096763	5.82	0.03771	NP000568_1737_41_S
8.32	-0.781	-1.23	0.24644	0.379101	1.53	0.24644	NP000573_102_37_X2
11.28	-1649	-2.85	0.01791	0.057428	8.15	0.01791	NP000609_462_35_S
7.4	-1.89	-3.24	0.00939	0.037899	10.52	0.00939	NP000612_1688_41_X3
6.76	0.894	1.12	0.28848	0.425258	1.26	0.28848	NP000613_2311_41_X4
8.1	0.236	0.37	0.71954	0.810674	0.14	0.71954	NP000615_2210_38_X2
7.3	-0.164	-0.26	0.80255	0.871699	0.07	0.80255	NP000616_1157_38_S
7.96	-0.911	-1.39	0.19591	0.320696	1.93	0.19591	NP000635_196_40_S
7.45	1475	2.39	0.03884	0.09874	5.73	0.03884	NP000637_150_40_S
8.76	0.014	0.02	0.98294	0.989061	0	0.98294	NP000641_218_40_S
8.68	-0.224	-0.38	0.71236	0.805177	0.14	0.71236	NP000646_345_35_S
7.78	-0.81	-1.36	0.20538	0.331996	1.85	0.20538	NP000648_1144_40_S
9.39	-0.209	-0.36	0.7244	0.814376	0.13	0.7244	NP000660_4_35_S
8.19	0.644	1.02	0.33389	0.472886	1.04	0.33389	NP000661_346_35_S
6.36	-3555	-5.32	0.0004	0.005871	28.26	0.0004	NP000664_262_40_S
7.62	2857	4.23	0.00195	0.014515	17.88	0.00195	NP000667_166_37_S
7.27	-3502	-4.19	0.00207	0.01501	17.54	0.00207	NP000670_94_41_S
7.51	-1271	-2.19	0.05472	0.125939	4.79	0.05472	NP000672_374_40_S
10.27	-1605	-2.8	0.0197	0.06151	7.83	0.0197	NP000693_546_38_S
7.85	0.446	0.68	0.51153	0.640672	0.46	0.51153	NP000711_1592_35_S
8.59	0.259	0.42	0.68417	0.782448	0.18	0.68417	NP000713_2373_34_X2
9.87	-0.337	-0.57	0.58003	0.698858	0.33	0.58003	NP000768_166_35_S
10.09	4407	4.39	0.00152	0.012558	19.3	0.00152	NP000774_394_34_X2
7.57	-0.042	-0.07	0.94621	0.966009	0	0.94621	NP000777_104_38_S
11	-2794	-4.75	0.00089	0.009227	22.58	0.00089	NP000792_694_34_S
10.66	-0.752	-1.25	0.24112	0.37305	1.56	0.24112	NP12919601_453_40_S
8.35	0.134	0.17	0.86991	0.916681	0.03	0.86991	NP12919606_526_38_X3
8.16	1079	1.65	0.13244	0.240559	2.71	0.13244	NP12919619_2667_40_S
7.74	NA	NA	NA	NA	NA	NA	NP12919706_831_39_X7
7.79	-1026	-1.1	0.30019	0.437952	1.2	0.30019	NP12919764_907_38_X7
7.37	-0.368	-0.61	0.55424	0.676984	0.38	0.55424	NP12919801_908_37_X7
7.4	-2459	-2.86	0.0199	0.061953	8.16	0.0199	NP12919824_724_39_S
7.89	0.111	0.17	0.86623	0.914569	0.03	0.86623	NP12919872_926_34_X7
8.52	-1712	-2.51	0.03189	0.086039	6.31	0.03189	NP12920167_1073_40_S
8.43	NA	NA	NA	NA	NA	NA	NP1348703_391_40_S
9.33	-1665	-2.87	0.01747	0.056468	8.24	0.01747	NP1348705_110_35_S
9.21	1349	2.11	0.06199	0.137701	4.47	0.06199	NP1427424_1433_35_S
7.12	-1156	-1.61	0.14034	0.250903	2.59	0.14034	NP1427425_333_38_S
7.31	-2826	-3.18	0.01204	0.044298	10.09	0.01204	NP1427426_352_39_S
8.63	-2.68	-4.32	0.00169	0.013375	18.68	0.00169	NP1427433_162_40_S
6.46	-0.02	-0.02	0.98157	0.988213	0	0.98157	NP1427471_434_35_S
9.26	-0.556	-0.92	0.38054	0.519111	0.85	0.38054	NP1427473_327_40_S
10.19	0.089	0.15	0.88306	0.925733	0.02	0.88306	NP1427479_425_35_S
7.95	0.843	1.39	0.19716	0.322116	1.92	0.19716	NP1427487_422_35_S
7.36	-0.511	-0.75	0.47344	0.606878	0.56	0.47344	NP1427488_2029_36_S
7.94	0.473	0.76	0.46375	0.597916	0.58	0.46375	NP1427492_444_38_S
8.86	-1752	-2.48	0.03352	0.088998	6.16	0.03352	NP1427497_539_35_S
7.54	-0.44	-0.65	0.53223	0.658763	0.42	0.53223	NP1427501_643_40_S
10.31	-0.086	-0.14	0.89441	0.933068	0.02	0.89441	NP1427508_1368_34_X3
7.84	-1421	-1.91	0.08724	0.17734	3.63	0.08724	NP162367_1719_40_S
9.9	-0.239	-0.39	0.70429	0.798323	0.15	0.70429	NP164398_280_35_S
8.9	NA	NA	NA	NA	NA	NA	NP183606_2346_39_S
7.89	-1.17	-1.54	0.15521	0.270198	2.38	0.15521	NP211475_1119_36_S
8.69	-2.66	-4.36	0.00159	0.01289	19.02	0.00159	NP220695_720_35_S
10.6	-2217	-3.65	0.00481	0.025049	13.35	0.00481	NP220696_602_41_X2
8.07	-2437	-2.67	0.02683	0.076242	7.13	0.02683	NP229224_808_36_S
9.16	0.229	0.35	0.73299	0.820981	0.12	0.73299	NP232854_94_37_S
8.56	-1679	-2.91	0.01622	0.053672	8.49	0.01622	NP232858_1084_39_S
11.73	-0.888	-1.5	0.16685	0.284963	2.24	0.16685	NP232862_691_35_S
8.21	-1217	-1.8	0.10302	0.200056	3.25	0.10302	NP232868_1063_39_S
7	-3914	-5.18	0.00069	0.007886	26.85	0.00069	NP233556_1135_40_S
9.44	-1788	-2.77	0.02073	0.063607	7.66	0.02073	NP240046_823_35_S
9.61	1389	2.32	0.04383	0.107591	5.39	0.04383	NP280325_354_39_S
7.9	-2074	-3.5	0.0062	0.029426	12.23	0.0062	NP299185_572_35_S
8.88	0.748	1.15	0.27791	0.413934	1.32	0.27791	NP301999_571_40_S
7.87	-4.09	-5.49	0.00047	0.006297	30.13	0.00047	NP313975_224_40_S
7.25	-1026	-1.2	0.25733	0.391645	1.45	0.25733	NP317302_290_40_S
7.71	-0.498	-0.85	0.41875	0.555803	0.71	0.41875	NP334018_1927_38_S
7.21	-2505	-2.73	0.02432	0.070942	7.46	0.02432	NP340041_140_39_S
8.61	-0.109	-0.19	0.85635	0.907945	0.03	0.85635	NP372537_1574_35_S
7.77	0.631	0.73	0.48089	0.613452	0.54	0.48089	NP411388_436_40_S
7.33	-1367	-2.09	0.06439	0.141668	4.37	0.06439	NP429926_878_40_S
8.8	-2335	-3.73	0.00428	0.023339	13.88	0.00428	NP457279_698_35_S
8.79	-1462	-2.26	0.04899	0.116689	5.09	0.04899	NP457283_716_35_S
7.92	-0.974	-1.63	0.1349	0.24375	2.67	0.1349	NP501700_1717_39_X2
11.25	-2453	-4.2	0.00204	0.014902	17.61	0.00204	NP545861_916_40_S
9.57	-2806	-4.46	0.00136	0.011801	19.93	0.00136	NP565609_1677_39_S
7.77	-0.549	-0.95	0.36492	0.503845	0.91	0.36492	NP566660_1907_40_S
7.61	-0.587	-0.69	0.50828	0.637918	0.47	0.50828	NP566661_3419_36_S
8.44	1111	1.53	0.15842	0.274394	2.34	0.15842	NP589727_3737_38_S
9.45	1.57	1.98	0.07783	0.162815	3.9	0.07783	NP589730_1565_37_S
8.01	-0.196	-0.3	0.76813	0.846571	0.09	0.76813	NP597560_913_39_S
7.68	-2403	-2.93	0.0176	0.056751	8.61	0.0176	NP597958_508_39_S
6.84	-2735	-3.08	0.01239	0.045129	9.46	0.01239	NP599148_439_37_S
11.22	0.081	0.1	0.92277	0.950514	0.01	0.92277	NP599151_500_35_S
9.56	-2122	-3.53	0.00586	0.02837	12.47	0.00586	NP796451_1558_36_S
7.3	-0.68	-0.9	0.38914	0.5272	0.81	0.38914	NP803368_693_35_S
8.83	2084	3.43	0.00696	0.031584	11.73	0.00696	NP803370_1084_40_S
7.7	0.178	0.3	0.76991	0.847802	0.09	0.76991	NP840676_1637_39_S
8.18	-0.627	-0.84	0.41977	0.556769	0.71	0.41977	NP918425_212_35_S
8.3	-1469	-2.37	0.04064	0.101923	5.6	0.04064	NP919973_252_40_S
11.66	-1.9	-3.16	0.01081	0.041482	9.97	0.01081	NP919974_3402_39_S
7.68	1368	2.28	0.04729	0.113766	5.18	0.04729	NP9243665_1222_38_S
7.76	-2377	-3.78	0.0039	0.022001	14.32	0.0039	NP9243669_955_35_S
7.38	-2038	-3.08	0.01229	0.044897	9.49	0.01229	NP9243686_1209_39_S
6.45	0.632	1.05	0.31882	0.457726	1.11	0.31882	NP9243691_3490_40_S
9.21	-0.241	-0.4	0.69693	0.792423	0.16	0.69693	NP9243692_3342_35_S
7.48	0.021	0.03	0.97388	0.983515	0	0.97388	NP9243776_634_39_S
9.45	4503	5.46	0.00033	0.005283	29.81	0.00033	NP9243789_1351_37_X3
7.35	-2814	-4.06	0.00252	0.016951	16.51	0.00252	NP9243819_1936_36_S
8.77	0.018	0.03	0.97932	0.986939	0	0.97932	NP9243838_1208_41_X2
7.81	-2.19	-3.01	0.01375	0.048017	9.08	0.01375	NP9243841_4136_39_S
8.37	-0.988	-1.67	0.12837	0.235076	2.77	0.12837	NP925939_857_35_S
7.6	-1483	-2.05	0.06838	0.14798	4.22	0.06838	NP9282144_2903_41_X2
7.47	-0.481	-0.71	0.49548	0.626816	0.5	0.49548	NP9282145_2478_41_S
9.25	-0.446	-0.65	0.5336	0.660085	0.42	0.5336	NP9282422_1072_34_X2
7.24	-2996	-4.02	0.00339	0.020226	16.13	0.00339	NP9282424_210_40_S
6.82	-2217	-3.22	0.00968	0.038587	10.4	0.00968	NP9287460_1185_40_S
9.46	-2201	-3.7	0.00445	0.023989	13.7	0.00445	NP9287462_458_35_S
9.9	0.653	0.97	0.35521	0.494272	0.94	0.35521	NP9287463_42_35_S
7.41	-0.757	-1.22	0.25223	0.385509	1.49	0.25223	NP9287465_406_35_S
8.58	-0.898	-1.53	0.15779	0.273525	2.35	0.15779	NP9287468_1492_39_S
8.19	-1349	-1.91	0.08633	0.175902	3.66	0.08633	NP9287469_354_35_S
7.43	-3688	-4.55	0.00159	0.012904	20.69	0.00159	NP9287470_364_41_S
9	NA	NA	NA	NA	NA	NA	NP9287473_167_40_S
11.2	-1397	-2.43	0.03631	0.09415	5.93	0.03631	NP9287474_327_34_X2
8.1	-2776	-4.22	0.00196	0.014578	17.83	0.00196	NP9287475_762_40_S
7.84	0.177	0.28	0.78242	0.85702	0.08	0.78242	NP9287486_837_35_S
7.23	-2553	-3.17	0.01217	0.044634	10.05	0.01217	NP9287487_4253_35_S
9.17	-0.275	-0.46	0.65403	0.759321	0.21	0.65403	NP9287489_1444_40_S
7.5	1.56	2.41	0.03801	0.097275	5.79	0.03801	NP9287490_1231_35_S
7.65	-0.571	-0.97	0.35706	0.496107	0.94	0.35706	NP9287492_1700_35_S
9.08	-2466	-4.07	0.00249	0.016855	16.55	0.00249	NP9287537_831_40_S
10.36	0.999	1.71	0.11948	0.222651	2.93	0.11948	NP9287543_278_40_S
8.37	-1557	-2.49	0.03328	0.088558	6.18	0.03328	NP9287546_372_35_S
7.74	NA	NA	NA	NA	NA	NA	NP9287547_208_35_S
7.86	NA	NA	NA	NA	NA	NA	NP9287548_284_35_S
8.02	-2836	-4.22	0.00197	0.014617	17.81	0.00197	NP9287551_345_35_S
7.44	0.167	0.27	0.79417	0.866014	0.07	0.79417	NP9287554_205_40_S
8.43	1522	2.63	0.02607	0.07463	6.92	0.02607	NP9287555_209_36_X2
8.42	-3029	-4.71	0.00094	0.009501	22.22	0.00094	NP9287557_266_38_S
7.71	-0.488	-0.69	0.50636	0.63605	0.48	0.50636	NP9287564_273_36_S
6.8	-2536	-2.64	0.02553	0.073508	6.99	0.02553	NP9287565_354_35_S
8.35	-2199	-3.6	0.00524	0.0264	12.96	0.00524	NP9287571_278_40_S
6.9	-3798	-4.67	0.00135	0.011762	21.79	0.00135	NP9287573_327_38_S
7.28	-2336	-3.87	0.00339	0.020226	15	0.00339	NP9287574_289_40_S
7.01	-2451	-3.34	0.00799	0.034258	11.16	0.00799	NP9287579_303_35_S
6.49	-2181	-2.8	0.0197	0.06151	7.83	0.0197	NP9287587_366_35_S
8.63	-2576	-3.66	0.00475	0.024904	13.41	0.00475	NP9287588_222_35_S
7.68	-1647	-2.44	0.03567	0.09295	5.98	0.03567	NP9287589_221_40_S
10.18	-1474	-2.36	0.04139	0.103185	5.55	0.04139	NP9287821_888_40_S
7.55	0.443	0.64	0.53689	0.662808	0.41	0.53689	NP9287822_560_41_X2
9.34	-2074	-3.51	0.00604	0.028971	12.34	0.00604	TC191360_6800_36_S
8.15	-1512	-1.62	0.13685	0.246385	2.64	0.13685	TC191361_5619_40_S
7.75	0.811	1.26	0.23919	0.370824	1.58	0.23919	TC191362_5619_38_S
9.26	-0.252	-0.42	0.68321	0.781797	0.18	0.68321	TC191363_4251_40_S
8.2	0.573	0.99	0.34532	0.484573	0.99	0.34532	TC191364_4489_39_S
7.73	-0.393	-0.65	0.53267	0.659135	0.42	0.53267	TC191365_4468_38_S
9.92	-1347	-2.29	0.0459	0.111405	5.26	0.0459	TC191366_4052_40_S
8.94	1397	2.16	0.05767	0.130555	4.65	0.05767	TC191367_3758_37_S
7.95	2421	3.28	0.0089	0.036569	10.73	0.0089	TC191368_4354_40_S
7.9	0.078	0.13	0.89996	0.936647	0.02	0.89996	TC191369_2433_41_S
12.26	0.129	0.22	0.82769	0.888174	0.05	0.82769	TC191370_3775_40_S
8.68	-0.478	-0.8	0.44109	0.576873	0.65	0.44109	TC191371_3427_37_S
8.13	-0.3	-0.51	0.62006	0.731601	0.26	0.62006	TC191372_3711_35_S
8.02	3.06	4.6	0.00112	0.010552	21.14	0.00112	TC191373_4340_40_S
9.37	-1709	-2.79	0.02008	0.062335	7.77	0.02008	TC191374_3372_39_S
8.25	1151	1.81	0.10251	0.199279	3.26	0.10251	TC191375_3600_39_S
7.36	-0.032	-0.05	0.96372	0.977064	0	0.96372	TC191376_2774_40_S
7.59	-0.882	-1.37	0.20109	0.32672	1.89	0.20109	TC191377_3339_35_S
13.2	-1195	-1.91	0.08684	0.176705	3.64	0.08684	TC191378_3891_35_X3
9.15	3695	5.65	0.00025	0.004694	31.98	0.00025	TC191379_3247_40_S
7.75	0.768	1.09	0.30306	0.44088	1.19	0.30306	TC191380_3311_39_S
8.33	2313	3.21	0.00991	0.039139	10.31	0.00991	TC191381_3343_40_S
10.83	-0.14	-0.24	0.81877	0.882537	0.06	0.81877	TC191382_3162_40_S
8.81	-1714	-2.96	0.01493	0.050788	8.78	0.01493	TC191383_3182_40_S
8.04	0.357	0.48	0.64524	0.751893	0.23	0.64524	TC191384_3318_40_S
9.32	1881	3.17	0.01056	0.040861	10.06	0.01056	TC191385_3166_38_S
9.04	1.48	2.38	0.03983	0.100443	5.66	0.03983	TC191386_3042_39_S
7.87	-0.069	-0.11	0.914	0.945583	0.01	0.914	TC191387_3148_39_S
8.74	1951	3.26	0.00908	0.03701	10.65	0.00908	TC191388_2961_40_S
6.48	3426	4.93	0.00068	0.007864	24.34	0.00068	TC191389_3184_39_S
9.89	0.232	0.3	0.77018	0.847968	0.09	0.77018	TC191390_3105_35_S
9.02	2081	3.42	0.00701	0.031704	11.7	0.00701	TC191391_3347_40_S
8.9	-0.768	-1.18	0.26761	0.40332	1.39	0.26761	TC191392_2875_37_S
9.47	1799	2.24	0.05	0.118516	5.03	0.05	TC191393_4259_35_S
8.01	-0.156	-0.27	0.7959	0.867228	0.07	0.7959	TC191394_2994_37_S
8.11	1575	2.37	0.04078	0.102187	5.59	0.04078	TC191395_2243_40_S
12.88	1.72	2.89	0.017	0.05544	8.33	0.017	TC191396_3129_37_S
11.09	1912	2.98	0.01448	0.04979	8.89	0.01448	TC191397_2806_38_S
10.38	-3191	-5.26	0.00043	0.006055	27.63	0.00043	TC191398_2612_34_S
9.47	-0.001	0	0.99941	0.999662	0	0.99941	TC191399_2733_40_S
9.12	1946	3.18	0.01045	0.040536	10.1	0.01045	TC191400_3226_37_S
7.1	0.592	0.95	0.36336	0.502439	0.91	0.36336	TC191402_2710_40_S
8.53	1852	2.69	0.02379	0.069994	7.21	0.02379	TC191403_2610_39_S
7.88	-1392	-1.87	0.09544	0.189166	3.51	0.09544	TC191404_3023_39_S
6.58	-0.679	-1.01	0.33776	0.476674	1.02	0.33776	TC191405_2347_39_S
8.51	2131	3.21	0.0099	0.039131	10.31	0.0099	TC191406_2629_40_S
7.97	-1.14	-1.77	0.10837	0.207507	3.14	0.10837	TC191407_134_33_S
8.08	1.04	1.56	0.15064	0.264309	2.44	0.15064	TC191408_246_41_S
8.61	2047	3.01	0.01388	0.048304	9.04	0.01388	TC191409_2439_40_S
7.76	1109	1.64	0.13382	0.242359	2.69	0.13382	TC191410_2415_40_S
8.62	1685	2.86	0.01769	0.056921	8.19	0.01769	TC191411_2520_40_S
9	2216	3.82	0.00366	0.021183	14.62	0.00366	TC191412_2284_38_S
8.68	0.015	0.02	0.98273	0.988973	0	0.98273	TC191413_3291_40_S
8.35	1651	2.83	0.01858	0.058965	8.03	0.01858	TC191414_2647_38_S
8.34	1365	2.08	0.06598	0.144193	4.31	0.06598	TC191415_3203_39_S
7.31	-3.04	-3.73	0.00517	0.02623	13.91	0.00517	TC191416_2111_41_S
9.33	3278	5.28	0.00042	0.005957	27.93	0.00042	TC191417_2551_39_S
7.79	-1304	-2.13	0.06048	0.135245	4.53	0.06048	TC191418_2465_38_S
7.69	1038	1.39	0.19505	0.319732	1.94	0.19505	TC191419_2810_39_S
14.06	-1715	-2.94	0.01552	0.052057	8.65	0.01552	TC191420_2325_40_S
8.07	0.121	0.15	0.88131	0.924236	0.02	0.88131	TC191421_2247_40_S
9.91	4997	6.93	5e-05	0.002042	47.96	5e-05	TC191422_2278_39_S
8.5	-0.967	-1.62	0.13834	0.248179	2.62	0.13834	TC191423_1327_35_S
9.35	2167	3.43	0.00687	0.031366	11.79	0.00687	TC191424_2212_40_S
8.05	0.673	1.03	0.32941	0.468605	1.06	0.32941	TC191425_2011_39_S
10.23	-1854	-2.51	0.03213	0.08651	6.29	0.03213	TC191426_2877_38_X3
7.69	-0.19	-0.25	0.80606	0.873783	0.06	0.80606	TC191427_2146_36_S
8.42	1989	3.08	0.01238	0.045097	9.46	0.01238	TC191428_2695_40_S
8.66	2266	3.1	0.01187	0.043922	9.62	0.01187	TC191429_2182_35_S
7.61	0.144	0.24	0.81434	0.879266	0.06	0.81434	TC191430_803_41_X4
8.07	0.132	0.22	0.83151	0.890823	0.05	0.83151	TC191431_2091_39_S
9.28	-1802	-2.99	0.01429	0.049387	8.94	0.01429	TC191432_2130_35_S
9.32	-0.883	-1.47	0.17406	0.293662	2.16	0.17406	TC191433_9434_39_S
7.58	2186	2.66	0.02505	0.072512	7.05	0.02505	TC191434_2912_36_S
8.2	1477	2.27	0.048	0.114898	5.14	0.048	TC191435_2229_40_S
9.46	-2683	-4.1	0.00238	0.016395	16.79	0.00238	TC191436_2595_35_S
7.96	0.175	0.3	0.77176	0.848947	0.09	0.77176	TC191437_2103_35_S
8.56	-1906	-2.75	0.0215	0.065268	7.54	0.0215	TC191438_1766_40_S
7.52	-2243	-2.57	0.02891	0.080242	6.6	0.02891	TC191439_1972_39_S
8.04	-0.299	-0.51	0.62224	0.733262	0.26	0.62224	TC191440_1462_40_S
8.91	1.87	3.1	0.01182	0.043814	9.63	0.01182	TC191441_1807_40_S
10.85	1483	2.28	0.04728	0.113764	5.18	0.04728	TC191442_1940_40_S
9.37	3322	5.12	0.00052	0.006741	26.24	0.00052	TC191443_1901_37_S
8.69	0.331	0.41	0.69135	0.787742	0.17	0.69135	TC191444_1917_38_S
12.84	0.098	0.16	0.87417	0.919556	0.03	0.87417	TC191445_1924_39_S
8.18	-0.131	-0.21	0.83538	0.893724	0.05	0.83538	TC191446_1867_40_S
8.15	1245	1.86	0.09368	0.186854	3.47	0.09368	TC191447_2057_36_S
10.8	5288	9.19	0	0.000823	84.38	0	TC191448_1868_37_S
8.02	0.029	0.05	0.96319	0.976698	0	0.96319	TC191449_2032_36_S
7.43	0.148	0.21	0.83914	0.896382	0.04	0.83914	TC191451_1769_38_S
7.42	-1805	-2.11	0.06545	0.143334	4.46	0.06545	TC191452_1690_39_S
8.19	0.959	1.62	0.13733	0.246965	2.63	0.13733	TC191453_1873_36_S
8.77	1337	2.3	0.04541	0.110496	5.29	0.04541	TC191454_2073_40_S
9	2219	3.8	0.00383	0.021718	14.41	0.00383	TC191455_2233_39_S
12.22	-0.441	-0.69	0.50455	0.634754	0.48	0.50455	TC191456_2076_40_S
10.3	5111	7.69	2e-05	0.00145	59.17	2e-05	TC191457_2170_39_S
9.12	0.862	1.41	0.19046	0.314066	1.99	0.19046	TC191458_1675_40_S
8.76	-1025	-1.71	0.12034	0.223913	2.91	0.12034	TC191459_1679_37_S
8.33	2205	3.14	0.01109	0.042136	9.87	0.01109	TC191460_1403_35_S
8.56	-0.547	-0.91	0.38646	0.524642	0.82	0.38646	TC191461_2223_39_S
8.85	2125	3.27	0.00892	0.03661	10.72	0.00892	TC191462_2145_37_S
8.48	-0.433	-0.57	0.58027	0.699069	0.33	0.58027	TC191463_1875_35_S
8.75	-0.243	-0.38	0.71275	0.805447	0.14	0.71275	TC191464_2030_39_S
7.42	-0.113	-0.14	0.89248	0.931765	0.02	0.89248	TC191465_1725_39_S
8.84	0.669	1.02	0.33367	0.472607	1.04	0.33367	TC191466_1732_35_S
8.86	2283	3.58	0.00543	0.027001	12.8	0.00543	TC191467_1739_39_S
7.66	0.233	0.33	0.74577	0.830456	0.11	0.74577	TC191468_1764_39_S
8.32	-0.808	-1.11	0.29401	0.431469	1.23	0.29401	TC191469_1862_40_S
7.56	-1949	-3.07	0.01255	0.045447	9.41	0.01255	TC191470_1776_37_S
10.94	5058	7.97	2e-05	0.001327	63.46	2e-05	TC191471_1941_40_S
8.85	1.79	2.68	0.0239	0.070177	7.2	0.0239	TC191472_2793_40_S
8.49	1168	1.93	0.08343	0.171409	3.74	0.08343	TC191473_2369_40_S
9.76	4145	6.85	6e-05	0.002141	46.99	6e-05	TC191474_1889_40_S
7.89	2266	3.69	0.00451	0.024161	13.64	0.00451	TC191475_588_41_S
7.35	-0.873	-1.3	0.22272	0.352296	1.7	0.22272	TC191476_1700_35_S
9.17	1844	2.68	0.02399	0.070332	7.19	0.02399	TC191477_2232_39_S
10.93	1106	1.92	0.08542	0.174516	3.68	0.08542	TC191478_1751_38_S
8.12	1239	1.94	0.08279	0.170701	3.76	0.08279	TC191479_1626_41_X2
10.49	5.77	9.64	0	0.000737	92.93	0	TC191480_1660_40_S
10.53	1105	1.67	0.12831	0.23503	2.77	0.12831	TC191481_1813_35_S
6.87	-2597	-3.19	0.01032	0.040212	10.15	0.01032	TC191482_729_39_S
8.48	-1002	-1.67	0.12644	0.232444	2.8	0.12644	TC191483_1686_37_X2
9.27	2165	2.91	0.01827	0.058287	8.48	0.01827	TC191484_1956_40_S
6.98	-1484	-1.74	0.11383	0.214952	3.03	0.11383	TC191485_1922_39_S
9.11	-0.449	-0.78	0.456	0.590675	0.6	0.456	TC191486_2159_37_S
10.82	0.475	0.77	0.46106	0.595339	0.59	0.46106	TC191487_1865_39_S
7.52	-1621	-2.68	0.02391	0.070213	7.2	0.02391	TC191488_1474_36_S
8.45	0.778	1.28	0.23204	0.362693	1.63	0.23204	TC191489_1552_40_S
7.93	1544	2.46	0.03496	0.091668	6.04	0.03496	TC191490_1657_40_S
11.68	4132	5.41	0.00051	0.006673	29.29	0.00051	TC191491_1557_37_S
7.62	1629	2.74	0.02185	0.066076	7.49	0.02185	TC191492_2001_40_S
10.85	-6373	-10.25	0	0.000668	105.15	0	TC191493_1572_35_S
8.68	2645	4.3	0.00174	0.013615	18.5	0.00174	TC191494_1495_40_S
10.56	3466	5.85	0.0002	0.004151	34.19	0.0002	TC191495_1587_35_S
8.55	1295	1.74	0.11469	0.216165	3.01	0.11469	TC191496_1130_35_S
7.49	-3397	-3.84	0.00356	0.020877	14.75	0.00356	TC191497_2096_35_S
11.49	5688	7.71	2e-05	0.001446	59.39	2e-05	TC191498_1389_40_S
10.78	-0.745	-1.16	0.27542	0.411478	1.34	0.27542	TC191499_1354_39_S
7.98	1035	1.71	0.11984	0.223141	2.92	0.11984	TC191500_1246_35_S
7.77	-2727	-3.6	0.00528	0.026534	12.93	0.00528	TC191501_1868_35_S
8.89	-0.585	-0.76	0.46342	0.597617	0.58	0.46342	TC191502_366_41_S
8.46	0.865	1.19	0.26138	0.396448	1.43	0.26138	TC191503_913_40_X2
8.29	-0.285	-0.33	0.74668	0.831242	0.11	0.74668	TC191504_1609_35_S
9.44	-0.664	-0.82	0.43116	0.567563	0.68	0.43116	TC191505_1442_40_S
7.14	0.972	1.69	0.12374	0.228665	2.85	0.12374	TC191507_1599_36_S
8.45	2021	3.19	0.0103	0.040147	10.16	0.0103	TC191508_1420_40_S
7.56	-0.131	-0.14	0.88974	0.929967	0.02	0.88974	TC191509_282_41_S
7.73	0.063	0.1	0.91858	0.948199	0.01	0.91858	TC191510_1374_40_S
7.67	0.248	0.34	0.73983	0.826011	0.12	0.73983	TC191511_1381_40_S
7.83	0.747	1.17	0.26993	0.405865	1.37	0.26993	TC191512_1355_39_S
7.92	2827	3.96	0.00295	0.018655	15.68	0.00295	TC191513_1356_40_S
9.17	-0.096	-0.15	0.88726	0.927973	0.02	0.88726	TC191514_1419_34_X2
6.47	-2714	-3.13	0.01134	0.042686	9.79	0.01134	TC191515_1397_40_S
9.99	4694	4.29	0.00177	0.013723	18.41	0.00177	TC191516_1563_40_S
8.31	-0.624	-1.08	0.30687	0.444941	1.17	0.30687	TC191517_1385_40_S
7.16	-2224	-3.23	0.00955	0.038331	10.45	0.00955	TC191518_1602_40_S
8.65	-0.515	-0.75	0.4698	0.603348	0.57	0.4698	TC191519_1739_39_S
11.69	0.028	0.05	0.96494	0.977809	0	0.96494	TC191520_1388_39_S
9.12	-0.403	-0.55	0.59203	0.708185	0.31	0.59203	TC191521_1222_37_S
8.78	-0.9	-1.47	0.1735	0.29305	2.16	0.1735	TC191522_1587_35_S
7.71	-0.632	-0.74	0.47781	0.610679	0.55	0.47781	TC191523_1350_41_X2
8.67	-2676	-4.61	0.00109	0.010392	21.27	0.00109	TC191524_1184_40_S
8.54	NA	NA	NA	NA	NA	NA	TC191525_1190_40_S
9.2	0.959	1.67	0.12699	0.233156	2.8	0.12699	TC191526_2543_40_S
9.14	2.14	3.64	0.00491	0.025412	13.25	0.00491	TC191527_1243_35_S
10.07	1208	1.78	0.10639	0.204674	3.18	0.10639	TC191528_1361_37_S
10.08	-2097	-3.64	0.00492	0.02544	13.24	0.00492	TC191529_1324_38_X2
8.31	0.547	0.89	0.39684	0.534492	0.79	0.39684	TC191530_1362_38_S
10.09	4.7	7.81	2e-05	0.001406	60.93	2e-05	TC191531_1335_40_S
8.2	0.886	1.52	0.16109	0.27769	2.31	0.16109	TC191532_1318_38_S
9.8	1163	1.98	0.07778	0.162781	3.91	0.07778	TC191533_1413_37_S
8.46	1519	2.34	0.04282	0.105748	5.46	0.04282	TC191534_2067_35_S
7.36	-0.617	-1.06	0.31389	0.452591	1.13	0.31389	TC191535_1178_40_S
8	3054	3.36	0.00775	0.033703	11.28	0.00775	TC191536_1222_40_S
8.11	0.589	0.87	0.406	0.543487	0.76	0.406	TC191537_1269_40_S
9.8	1187	1.8	0.10335	0.200418	3.24	0.10335	TC191538_1621_40_S
8.64	1543	2.67	0.02436	0.070999	7.14	0.02436	TC191539_1558_40_S
10	1148	1.93	0.08425	0.17266	3.71	0.08425	TC191540_1242_36_S
8.95	1937	2.76	0.02108	0.064353	7.61	0.02108	TC191541_1251_40_S
7.42	-0.801	-1.32	0.21828	0.346908	1.74	0.21828	TC191542_1490_37_S
7.43	-2699	-3.06	0.0145	0.049829	9.35	0.0145	TC191543_1899_37_S
8.37	2416	4.19	0.00205	0.014928	17.59	0.00205	TC191544_1242_40_S
9	5496	8.06	1e-05	0.001266	65	1e-05	TC191545_1234_35_S
8.7	-1126	-1.94	0.08255	0.170366	3.76	0.08255	TC191546_595_39_S
7.3	2396	3.08	0.0124	0.045131	9.46	0.0124	TC191547_1337_37_S
8.09	0.163	0.26	0.80307	0.871963	0.07	0.80307	TC191548_1083_38_S
8.06	0.755	1.17	0.26912	0.405011	1.38	0.26912	TC191549_1219_34_X2
10.08	2925	5.06	0.00057	0.007076	25.57	0.00057	TC191550_1489_41_X4
9.76	2667	4.39	0.00153	0.012597	19.26	0.00153	TC191551_1499_41_X2
9.2	4709	7.32	3e-05	0.001725	53.51	3e-05	TC191554_1148_40_S
8.29	-0.389	-0.62	0.5522	0.675171	0.38	0.5522	TC191555_838_36_S
9.26	-0.113	-0.14	0.89062	0.930682	0.02	0.89062	TC191556_1181_40_S
8.44	0.708	1.1	0.29756	0.435329	1.21	0.29756	TC191557_1604_40_S
8.25	1846	3.01	0.01375	0.048017	9.08	0.01375	TC191558_1425_38_S
7.69	-1253	-1.69	0.12349	0.228364	2.85	0.12349	TC191559_1984_37_S
7.69	-0.415	-0.61	0.55341	0.676334	0.38	0.55341	TC191560_1391_38_S
10.92	0.781	1.33	0.21549	0.343803	1.76	0.21549	TC191561_2803_40_S
9.95	1706	2.57	0.02905	0.080511	6.59	0.02905	TC191562_2050_36_X2
8.18	1067	1.82	0.09956	0.1951	3.33	0.09956	TC191563_1293_39_S
9.68	-0.279	-0.43	0.67819	0.778243	0.18	0.67819	TC191564_1175_39_S
9.56	2338	3.67	0.00469	0.024712	13.46	0.00469	TC191565_1156_39_S
8.41	-2062	-3.48	0.00639	0.030015	12.1	0.00639	TC191566_1065_40_S
6.74	1376	2.17	0.0564	0.128674	4.71	0.0564	TC191567_1197_40_S
8.86	-0.008	-0.01	0.98884	0.99259	0	0.98884	TC191568_1054_35_S
7.75	0.307	0.51	0.62091	0.732354	0.26	0.62091	TC191569_1201_40_S
9.74	-0.163	-0.23	0.8202	0.883498	0.05	0.8202	TC191570_8_40_S
7.83	2203	3.59	0.00535	0.026723	12.87	0.00535	TC191571_1279_40_S
7.12	-0.17	-0.23	0.82457	0.886179	0.05	0.82457	TC191572_1210_40_S
10.01	4943	6.99	5e-05	0.001985	48.8	5e-05	TC191573_2302_39_S
11.94	0.195	0.24	0.81341	0.878643	0.06	0.81341	TC191574_1209_38_S
10.08	1.12	1.85	0.09595	0.189947	3.41	0.09595	TC191575_1032_40_S
11.42	-2645	-4.53	0.00123	0.011141	20.52	0.00123	TC191576_953_34_S
9.9	-0.215	-0.3	0.77317	0.849837	0.09	0.77317	TC191577_1643_37_S
8.97	2497	2.76	0.02101	0.064236	7.62	0.02101	TC191578_765_39_S
8.69	1373	1.63	0.13501	0.243858	2.67	0.13501	TC191579_1319_37_S
9.81	-1461	-2.51	0.03213	0.086513	6.29	0.03213	TC191581_1150_36_S
10.45	0.556	0.72	0.48731	0.619204	0.52	0.48731	TC191582_1386_38_S
7.75	3.42	5.64	0.00026	0.004747	31.82	0.00026	TC191583_951_39_S
9.4	4949	7.51	3e-05	0.00157	56.45	3e-05	TC191584_2413_40_S
7.43	-2005	-3.05	0.01294	0.046328	9.3	0.01294	TC191585_1106_35_S
8.79	3987	4.46	0.00138	0.01189	19.86	0.00138	TC191586_1040_39_S
10.7	-1002	-1.59	0.14386	0.255488	2.54	0.14386	TC191587_817_39_S
7.54	1066	1.73	0.11494	0.216469	3.01	0.11494	TC191588_991_40_S
8.33	0.847	1.23	0.24971	0.382963	1.5	0.24971	TC191589_998_40_S
9.38	1824	3.03	0.01339	0.047342	9.18	0.01339	TC191590_936_40_S
10.66	1.36	2.37	0.04042	0.101554	5.62	0.04042	TC191591_1051_40_S
8.58	1.59	2.17	0.05628	0.128573	4.72	0.05628	TC191592_2431_37_S
9.3	2569	3.97	0.00292	0.018552	15.74	0.00292	TC191593_1352_40_S
8.68	-1372	-2.38	0.03982	0.100436	5.66	0.03982	TC191594_1062_35_S
9.3	-2519	-3.42	0.00696	0.031584	11.73	0.00696	TC191595_451_37_S
8.24	0.511	0.85	0.41408	0.551064	0.73	0.41408	TC191596_895_39_S
8.77	1965	2.86	0.01769	0.056921	8.19	0.01769	TC191597_986_39_S
7.26	-1194	-1.98	0.07726	0.161959	3.92	0.07726	TC191598_917_39_S
12.14	3374	5.6	0.00027	0.004881	31.34	0.00027	TC191599_1209_40_S
10.66	7449	11.68	0	0.000579	136.47	0	TC191600_896_38_S
9.92	5399	7.65	2e-05	0.001476	58.6	2e-05	TC191601_2212_37_S
10.31	4038	5.28	0.0006	0.007264	27.91	0.0006	TC191602_1186_40_S
6.89	-0.148	-0.2	0.84792	0.902548	0.04	0.84792	TC191603_3483_39_S
9.43	1784	3.11	0.01178	0.043741	9.65	0.01178	TC191604_1283_36_S
10.5	5096	8.48	1e-05	0.001078	71.95	1e-05	TC191605_958_36_S
7.41	2	3.03	0.01326	0.047058	9.21	0.01326	TC191606_1053_39_S
8.06	1408	2.43	0.03653	0.094595	5.91	0.03653	TC191607_1363_40_S
9.97	-3479	-5.53	0.0003	0.005034	30.55	0.0003	TC191608_912_40_S
9.23	3994	5.23	0.00064	0.007563	27.4	0.00064	TC191609_2285_40_S
10.07	-0.706	-1.18	0.26726	0.402924	1.39	0.26726	TC191610_1237_39_S
7.81	-1509	-2.04	0.07022	0.150978	4.16	0.07022	TC191611_1430_36_S
9.02	2243	3.6	0.00525	0.026449	12.95	0.00525	TC191612_2184_40_S
8.72	0.083	0.12	0.90492	0.93972	0.02	0.90492	TC191613_1931_40_S
12.15	-0.796	-1.39	0.19685	0.321768	1.93	0.19685	TC191614_1273_35_S
10.65	3747	5.71	0.00024	0.004518	32.59	0.00024	TC191615_2118_39_S
9.87	1492	2.3	0.0452	0.11007	5.31	0.0452	TC191616_1815_40_S
9.75	2974	5.04	0.00059	0.007152	25.42	0.00059	TC191617_1971_40_S
10.09	3845	4.49	0.00131	0.01157	20.16	0.00131	TC191618_1021_37_S
8.27	3314	5.42	0.00035	0.005465	29.33	0.00035	TC191619_1726_39_S
9.63	-0.49	-0.77	0.45786	0.592345	0.6	0.45786	TC191620_2344_37_S
9.93	3233	5.29	0.00041	0.005947	27.98	0.00041	TC191621_1016_38_S
7.77	-2095	-2.71	0.025	0.072405	7.37	0.025	TC191624_1188_38_S
7.71	-0.219	-0.35	0.73625	0.823439	0.12	0.73625	TC191625_857_39_S
9.05	0.969	1.64	0.13417	0.242801	2.68	0.13417	TC191626_1006_35_S
9.37	3444	5.11	0.00053	0.006816	26.13	0.00053	TC191627_1010_40_S
8.26	2135	2.66	0.02499	0.072405	7.06	0.02499	TC191628_1274_37_S
9.63	2561	3.9	0.00326	0.019782	15.18	0.00326	TC191629_1238_35_S
8.05	0.418	0.53	0.61098	0.724298	0.28	0.61098	TC191630_2_41_S
9.86	0.418	0.72	0.49107	0.622773	0.51	0.49107	TC191631_1108_39_S
8.54	-0.04	-0.06	0.94978	0.968245	0	0.94978	TC191632_1615_35_S
8.7	-0.64	-1.03	0.32984	0.469012	1.05	0.32984	TC191633_2427_37_S
8.17	-1955	-3.12	0.01156	0.043185	9.72	0.01156	TC191634_939_34_S
9.17	-0.259	-0.38	0.70991	0.80311	0.15	0.70991	TC191635_946_38_S
8.03	-0.741	-1.22	0.25061	0.383955	1.5	0.25061	TC191636_1345_35_S
9.6	2844	4.85	0.00077	0.008469	23.5	0.00077	TC191637_2091_40_S
11.4	0.052	0.07	0.94498	0.965018	0.01	0.94498	TC191638_1066_40_S
7.41	-0.669	-1.13	0.28772	0.424423	1.27	0.28772	TC191639_1152_41_S
7.47	0.357	0.62	0.54774	0.671481	0.39	0.54774	TC191640_908_40_S
6.9	-0.818	-1.24	0.24408	0.376528	1.54	0.24408	TC191641_479_37_S
7.68	0.125	0.15	0.88082	0.923908	0.02	0.88082	TC191642_72_41_S
8.56	1748	2.64	0.02583	0.074118	6.95	0.02583	TC191643_1039_35_S
8.07	-1612	-2.52	0.03165	0.085612	6.33	0.03165	TC191644_915_35_S
6.72	0.495	0.69	0.50866	0.638264	0.47	0.50866	TC191645_2391_40_S
12.31	-2.68	-4.54	0.00121	0.01105	20.63	0.00121	TC191647_40_37_S
9.15	1561	2.55	0.02984	0.082053	6.51	0.02984	TC191648_1227_40_S
8.74	1757	2.9	0.0166	0.054498	8.41	0.0166	TC191649_1297_40_S
8.67	3513	5.9	0.00018	0.004048	34.79	0.00018	TC191650_1486_35_S
8.81	2217	2.98	0.0146	0.050029	8.86	0.0146	TC191652_2130_39_S
9.43	-2423	-4.2	0.00202	0.014801	17.67	0.00202	TC191653_175_41_S
9.11	-0.542	-0.79	0.4514	0.586677	0.62	0.4514	TC191654_1724_40_S
7.84	0.274	0.45	0.66356	0.766743	0.2	0.66356	TC191655_1611_40_S
11.01	-2539	-3.8	0.00379	0.0216	14.46	0.00379	TC191656_666_35_S
8.85	2053	2.7	0.0231	0.068685	7.31	0.0231	TC191657_2024_38_S
12.43	-5.04	-8.57	1e-05	0.001039	73.5	1e-05	TC191658_1868_35_S
7.96	-0.652	-1.1	0.29829	0.435989	1.21	0.29829	TC191659_426_40_S
8.76	1515	2.2	0.05332	0.123734	4.86	0.05332	TC191660_912_35_S
9.36	-1999	-3.43	0.00686	0.031366	11.79	0.00686	TC191661_885_34_X6
8.39	0.595	0.95	0.36516	0.504038	0.9	0.36516	TC191662_764_39_S
8.85	2008	3.49	0.00631	0.029804	12.15	0.00631	TC191663_1275_40_S
9.61	-1833	-2.77	0.02055	0.063209	7.69	0.02055	TC191664_1836_40_S
8.75	2332	3.51	0.00609	0.029102	12.3	0.00609	TC191665_1721_35_S
8.99	1472	2.24	0.05018	0.118755	5.02	0.05018	TC191666_281_40_S
7.39	-4081	-5.42	0.00051	0.006663	29.33	0.00051	TC191667_1493_41_S
9.93	-1734	-2.55	0.02971	0.081822	6.52	0.02971	TC191668_1184_40_S
9.29	-2504	-3.93	0.00312	0.019245	15.41	0.00312	TC191669_1238_40_S
8.46	1801	3.02	0.01359	0.047739	9.12	0.01359	TC191670_1298_39_S
9.09	2452	3.26	0.01059	0.040963	10.62	0.01059	TC191671_1848_39_S
11.13	-0.281	-0.35	0.73537	0.822789	0.12	0.73537	TC191672_958_40_S
9.11	1985	3.12	0.01155	0.043182	9.72	0.01155	TC191673_1591_36_S
9.63	5568	9.49	0	0.000758	90.09	0	TC191674_940_40_S
9.09	3093	5.15	0.0005	0.006608	26.53	0.0005	TC191675_1409_39_S
8.54	2012	3.28	0.00888	0.036499	10.74	0.00888	TC191676_1110_35_S
7.56	1698	2.57	0.02912	0.08069	6.58	0.02912	TC191677_1943_37_S
7.93	1422	2.17	0.05649	0.128768	4.71	0.05649	TC191678_838_40_S
11.08	-1257	-1.95	0.0806	0.167291	3.82	0.0806	TC191679_1356_38_S
8.64	2118	3.33	0.00813	0.034578	11.09	0.00813	TC191680_1881_37_S
8.08	1.79	2.81	0.01923	0.060494	7.91	0.01923	TC191681_2647_40_S
9.99	1461	2.15	0.05874	0.132302	4.61	0.05874	TC191682_2300_40_S
9.48	2114	2.85	0.02018	0.062525	8.11	0.02018	TC191683_1468_40_S
8.39	2491	3.57	0.00553	0.027332	12.72	0.00553	TC191684_2354_40_S
8.02	0.961	1.38	0.19799	0.323152	1.91	0.19799	TC191685_3034_40_S
10.05	-1.32	-2.21	0.05315	0.123492	4.87	0.05315	TC191686_25_36_S
8.64	-2421	-3.3	0.00861	0.035782	10.86	0.00861	TC191687_1724_35_S
5.79	-1643	-0.98	0.35267	0.491945	0.97	0.35267	TC191688_465_41_S
8.61	2961	4.09	0.00241	0.016511	16.72	0.00241	TC191689_1492_35_S
9.55	-5449	-9.34	0	0.000792	87.15	0	TC191690_2521_37_S
9.83	-1014	-1.02	0.33164	0.470663	1.05	0.33164	TC191691_564_37_S
10.66	2198	2.53	0.03102	0.084418	6.39	0.03102	TC191692_844_40_S
9.65	0.088	0.1	0.91982	0.948899	0.01	0.91982	TC191693_981_35_S
8.59	-1019	-1.71	0.11889	0.221922	2.94	0.11889	TC191694_1368_38_S
8.1	1338	2.21	0.05313	0.123478	4.87	0.05313	TC191695_932_38_S
9.19	2272	3.37	0.00757	0.033199	11.38	0.00757	TC191696_1240_38_S
10.55	3144	5.41	0.00035	0.005508	29.24	0.00035	TC191697_1137_38_S
10.41	1049	1.29	0.22878	0.359155	1.65	0.22878	TC191698_995_40_S
8.24	1786	2.38	0.04007	0.100845	5.64	0.04007	TC191699_1561_36_S
9.38	2799	4.64	0.00105	0.0102	21.49	0.00105	TC191700_2090_40_S
8.35	3219	5.18	0.00049	0.006472	26.78	0.00049	TC191701_1221_39_S
8.93	3018	5.19	0.00048	0.006389	26.94	0.00048	TC191702_1021_41_X2
8.84	2842	3.74	0.00418	0.022933	14	0.00418	TC191703_946_40_S
9.07	-1184	-2.03	0.07107	0.152359	4.13	0.07107	TC191704_1541_40_S
7.61	1336	2.3	0.0456	0.110853	5.28	0.0456	TC191705_790_40_S
7.29	0.813	1.3	0.22544	0.355511	1.68	0.22544	TC191707_1401_40_S
8.02	-0.026	-0.04	0.96563	0.978065	0	0.96563	TC191708_895_39_S
7.25	-1848	-2.1	0.06631	0.14469	4.43	0.06631	TC191709_1463_35_S
9.88	4917	7.83	2e-05	0.001398	61.29	2e-05	TC191710_867_38_X2
7.12	-0.966	-1.53	0.15857	0.274574	2.34	0.15857	TC191711_960_40_X2
10.33	-1291	-2.16	0.05732	0.129993	4.67	0.05732	TC191712_1508_40_S
7.81	0.328	0.54	0.60087	0.715758	0.29	0.60087	TC191713_1039_41_S
9.38	3663	5.65	0.00026	0.004732	31.88	0.00026	TC191714_818_40_S
8.58	2166	3.09	0.01212	0.044495	9.54	0.01212	TC191715_1422_37_S
10.65	1.72	2.7	0.0232	0.06884	7.29	0.0232	TC191716_1154_40_S
9.86	0.808	1.41	0.19097	0.314768	1.98	0.19097	TC191717_944_37_S
8.71	2.1	3.54	0.00576	0.028123	12.54	0.00576	TC191718_839_40_S
11.1	-2603	-3.49	0.00625	0.029604	12.19	0.00625	TC191719_1591_36_S
7.83	0.665	1.13	0.28587	0.422408	1.28	0.28587	TC191720_1243_40_S
8.64	2.74	4.21	0.002	0.014676	17.75	0.002	TC191721_1157_40_S
7.75	-2289	-3.42	0.00708	0.031893	11.66	0.00708	TC191722_1611_35_S
6.81	-0.807	-1.15	0.27938	0.415454	1.32	0.27938	TC191723_241_41_S
8.68	-0.909	-1.43	0.18467	0.306884	2.04	0.18467	TC191724_504_40_S
10.14	0.874	1.22	0.25093	0.384258	1.49	0.25093	TC191725_928_35_S
9.4	0.537	0.82	0.43372	0.569998	0.67	0.43372	TC191726_2159_38_S
8.62	1539	2.26	0.04829	0.115416	5.13	0.04829	TC191727_1344_40_S
10.18	3114	4.77	0.00086	0.009082	22.77	0.00086	TC191728_1080_40_S
7.34	-0.583	-0.73	0.48607	0.618244	0.53	0.48607	TC191729_1419_37_X2
9.36	-0.328	-0.4	0.69731	0.792714	0.16	0.69731	TC191730_1076_40_S
7.34	1383	1.52	0.16193	0.278827	2.3	0.16193	TC191731_1711_36_S
6.77	-0.082	-0.11	0.911	0.9435	0.01	0.911	TC191732_1384_41_S
9.64	0.04	0.07	0.94659	0.966209	0	0.94659	TC191733_1157_38_S
8.89	-0.876	-1.28	0.22918	0.359621	1.65	0.22918	TC191734_1493_35_S
8.59	1166	1.78	0.10713	0.205692	3.16	0.10713	TC191735_2232_40_S
9.35	-0.921	-1.52	0.16203	0.278932	2.3	0.16203	TC191736_900_40_S
7.55	0.269	0.45	0.66039	0.764116	0.21	0.66039	TC191737_1218_39_S
8.4	1863	2.8	0.01956	0.061221	7.85	0.01956	TC191738_913_34_X2
10.12	2.05	3.51	0.00606	0.029028	12.32	0.00606	TC191739_1404_38_S
8.65	3503	5.53	0.0003	0.005029	30.59	0.0003	TC191740_1120_35_S
8.15	0.99	1.65	0.13185	0.239879	2.72	0.13185	TC191741_2780_40_S
10.05	0.052	0.08	0.94065	0.962657	0.01	0.94065	TC191742_2415_38_S
7.2	-0.716	-1.19	0.2615	0.396578	1.42	0.2615	TC191743_1073_36_S
7.39	1862	2.76	0.02114	0.064452	7.6	0.02114	TC191744_1346_40_S
9.29	0.015	0.02	0.98096	0.987909	0	0.98096	TC191745_1702_40_S
8.14	3152	4.63	0.00106	0.010247	21.44	0.00106	TC191746_1275_40_X2
8.83	-1866	-3.06	0.01279	0.045988	9.34	0.01279	TC191747_2621_37_S
8.99	2678	3.72	0.0043	0.023418	13.86	0.0043	TC191748_924_40_S
8.36	1.5	2.57	0.02878	0.079986	6.62	0.02878	TC191749_1405_40_S
8.81	1881	3.02	0.01353	0.047587	9.14	0.01353	TC191750_904_39_X2
8.03	-0.29	-0.39	0.70644	0.800287	0.15	0.70644	TC191751_1205_35_S
9.91	0.2	0.25	0.81005	0.876367	0.06	0.81005	TC191752_841_41_X3
11.43	-1198	-2.02	0.07262	0.154749	4.07	0.07262	TC191753_918_40_S
8.85	-0.448	-0.76	0.46522	0.599228	0.58	0.46522	TC191754_1259_40_S
10.16	1.72	2.71	0.02277	0.068036	7.35	0.02277	TC191755_1367_35_S
7.82	1.8	2.81	0.01938	0.06083	7.88	0.01938	TC191756_457_41_X2
8.46	0.125	0.14	0.89254	0.931768	0.02	0.89254	TC191757_466_40_S
7.16	-2.38	-2.95	0.01724	0.05601	8.69	0.01724	TC191758_1314_38_S
8.12	-0.301	-0.46	0.65774	0.761949	0.21	0.65774	TC191759_1144_40_S
8.6	1295	1.56	0.15211	0.26626	2.42	0.15211	TC191760_174_34_X2
8.3	1435	2.21	0.05292	0.123198	4.88	0.05292	TC191761_1528_40_S
10.36	2965	4.36	0.0016	0.012929	18.99	0.0016	TC191762_1235_37_S
8.64	4154	5.7	0.00024	0.004546	32.51	0.00024	TC191763_1156_36_S
8.59	-0.78	-1.06	0.3157	0.454486	1.12	0.3157	TC191764_1836_38_S
8.3	0.066	0.1	0.91903	0.948467	0.01	0.91903	TC191765_8_40_S
11.04	1426	2.19	0.05438	0.125412	4.81	0.05438	TC191766_888_40_S
8.45	1292	2.21	0.0526	0.122713	4.9	0.0526	TC191767_1215_37_S
9.49	-0.112	-0.2	0.8491	0.903102	0.04	0.8491	TC191768_1362_37_S
8.03	1642	2.84	0.01832	0.058379	8.07	0.01832	TC191769_2525_40_S
8.59	1453	2.1	0.06371	0.14047	4.4	0.06371	TC191770_792_41_X2
7.84	-0.86	-1.45	0.17901	0.299817	2.1	0.17901	TC191771_870_35_S
10.5	-0.547	-0.86	0.41098	0.548167	0.74	0.41098	TC191772_1986_39_S
9.38	2463	4.28	0.00181	0.013888	18.29	0.00181	TC191773_18_38_S
13.14	3622	6.26	0.00012	0.003084	39.23	0.00012	TC191774_1397_40_S
7.94	0.105	0.17	0.87126	0.917618	0.03	0.87126	TC191775_1225_38_S
7.72	0.417	0.53	0.60908	0.722895	0.28	0.60908	TC191776_1366_35_S
9.52	2278	3.96	0.00297	0.018714	15.65	0.00297	TC191777_2006_40_S
10.19	-0.791	-1.23	0.24725	0.380033	1.52	0.24725	TC191778_1141_35_S
7.9	-0.612	-0.9	0.3882	0.526397	0.82	0.3882	TC191779_1123_39_S
9.09	-0.202	-0.28	0.7837	0.857839	0.08	0.7837	TC191780_2285_40_S
8.22	-2178	-3.68	0.00457	0.024374	13.58	0.00457	TC191781_238_34_S
8.55	2375	3.96	0.00296	0.018684	15.66	0.00296	TC191782_953_40_S
8.8	2132	3.39	0.00737	0.032658	11.49	0.00737	TC191783_1007_38_S
10.49	-0.245	-0.32	0.75738	0.838494	0.1	0.75738	TC191784_1133_35_S
8.67	1978	2.75	0.02145	0.065172	7.55	0.02145	TC191785_1803_40_S
9.68	-2267	-3.71	0.00442	0.02388	13.74	0.00442	TC191786_73_36_S
7.63	-2.4	-2.97	0.01482	0.050542	8.81	0.01482	TC191787_898_35_S
5.76	-4793	-5.17	0.0007	0.007959	26.68	0.0007	TC191788_15_41_X2
8.53	1.37	1.68	0.12502	0.230413	2.83	0.12502	TC191789_579_41_S
8.95	2998	3.99	0.00282	0.018183	15.92	0.00282	TC191790_2490_40_S
9.28	-0.95	-1.49	0.16787	0.286115	2.23	0.16787	TC191791_10_41_S
11.65	-0.505	-0.83	0.42486	0.561705	0.7	0.42486	TC191792_802_40_S
8.79	1853	2.99	0.01434	0.0495	8.93	0.01434	TC191793_735_41_X3
9.41	4397	6.71	7e-05	0.002283	45.03	7e-05	TC191794_858_40_S
8.49	1883	3.25	0.00925	0.037532	10.57	0.00925	TC191795_1990_39_S
11.49	-0.922	-1.59	0.14476	0.25671	2.52	0.14476	TC191796_1253_40_S
9.85	0.909	1.25	0.23974	0.371479	1.57	0.23974	TC191797_1185_35_S
8.64	1635	2.55	0.02974	0.081878	6.52	0.02974	TC191798_2165_35_S
8.39	1734	2.68	0.02394	0.070248	7.19	0.02394	TC191799_1026_40_S
7.24	-1546	-2.21	0.05296	0.123225	4.88	0.05296	TC191800_1385_35_S
11.4	-1592	-2.56	0.02947	0.081334	6.55	0.02947	TC191801_1929_40_S
12.02	4982	7.89	2e-05	0.001369	62.32	2e-05	TC191802_2211_40_S
7.98	0.051	0.09	0.93131	0.956253	0.01	0.93131	TC191803_1857_40_S
8.66	2.77	4.17	0.00213	0.015253	17.39	0.00213	TC191804_1444_36_S
8.06	-0.329	-0.5	0.62521	0.735592	0.25	0.62521	TC191805_847_40_S
8.56	-0.194	-0.31	0.7613	0.841335	0.1	0.7613	TC191806_907_40_S
7.65	1998	3	0.01402	0.048665	9.01	0.01402	TC191807_1815_39_S
10.09	2376	4.14	0.00222	0.015633	17.17	0.00222	TC191808_3118_39_S
7.29	-3546	-4.78	0.00117	0.010842	22.82	0.00117	TC191809_166_41_S
8.1	0.423	0.6	0.56122	0.682953	0.36	0.56122	TC191810_348_40_S
10.48	3115	2.83	0.01881	0.059525	7.99	0.01881	TC191811_865_35_S
7.88	2688	3.91	0.00319	0.019505	15.3	0.00319	TC191812_1237_39_S
8.18	-0.753	-1.27	0.23364	0.364532	1.62	0.23364	TC191813_315_34_S
11.95	-0.477	-0.83	0.42878	0.565535	0.68	0.42878	TC191815_1310_40_S
8.48	0.986	1.2	0.26137	0.396448	1.45	0.26137	TC191816_1659_37_S
8.14	0.061	0.08	0.93682	0.960197	0.01	0.93682	TC191817_1518_40_S
7.98	2093	3.47	0.00645	0.030149	12.06	0.00645	TC191818_2228_40_S
8.39	1281	2	0.0752	0.158625	3.99	0.0752	TC191819_1122_36_S
10.72	6915	9.22	0	0.000823	84.94	0	TC191820_1177_39_X3
8.15	0.851	1.19	0.26149	0.396578	1.42	0.26149	TC191821_2155_35_S
8.57	0.628	0.98	0.35336	0.492632	0.95	0.35336	TC191822_1332_40_S
9.73	4.16	6.41	0.0001	0.002773	41.03	0.0001	TC191824_1719_40_S
9.21	2807	3.97	0.00292	0.01855	15.74	0.00292	TC191825_2359_39_S
7.47	0.246	0.38	0.70952	0.8029	0.15	0.70952	TC191826_1691_36_S
8.14	-1133	-1.85	0.09482	0.188383	3.44	0.09482	TC191827_1102_40_S
10.47	-1025	-1.61	0.13999	0.250377	2.59	0.13999	TC191828_1760_40_S
8.4	2979	4.69	0.00097	0.009687	22.03	0.00097	TC191829_2312_40_S
8.91	-1304	-1.7	0.12514	0.230543	2.89	0.12514	TC191830_1067_40_S
6.7	-0.712	-0.79	0.45135	0.586642	0.62	0.45135	TC191831_394_37_X2
11.08	-0.118	-0.18	0.8645	0.913428	0.03	0.8645	TC191833_2389_40_S
8.27	1857	2.88	0.01719	0.05588	8.29	0.01719	TC191834_1390_35_S
7.06	-2708	-2.54	0.03019	0.082735	6.47	0.03019	TC191835_855_37_S
8.35	3274	2.64	0.02567	0.073796	6.97	0.02567	TC191836_919_38_S
10.78	-0.859	-1.37	0.2012	0.326849	1.89	0.2012	TC191837_1444_37_S
7.99	0.673	0.87	0.40601	0.543487	0.76	0.40601	TC191838_1083_40_S
8.63	-2096	-3.17	0.01052	0.040724	10.08	0.01052	TC191839_1065_35_S
8.67	-0.054	-0.08	0.94171	0.963175	0.01	0.94171	TC191840_737_35_S
8.63	1.81	2.41	0.03808	0.097391	5.79	0.03808	TC191841_1967_35_S
8.63	4078	6.8	6e-05	0.002215	46.25	6e-05	TC191842_1963_38_S
7.16	1915	2.49	0.03322	0.088448	6.19	0.03322	TC191843_68_41_S
9.73	5292	8.14	1e-05	0.001265	66.2	1e-05	TC191844_988_40_S
9.27	-0.273	-0.45	0.66281	0.766108	0.2	0.66281	TC191845_1105_38_S
7.44	-0.653	-0.86	0.41356	0.550613	0.74	0.41356	TC191846_344_41_X2
9.02	1613	2.47	0.03405	0.08996	6.11	0.03405	TC191847_1137_40_S
10.9	2404	3.88	0.00336	0.02013	15.04	0.00336	TC191848_1427_40_S
8.2	3529	5.47	0.00032	0.005238	29.9	0.00032	TC191849_1397_39_S
8.17	2429	3.97	0.00289	0.018451	15.79	0.00289	TC191850_1191_36_S
9.63	2367	2.99	0.01431	0.04944	8.94	0.01431	TC191851_843_35_S
9.87	2.61	4.55	0.0012	0.011008	20.68	0.0012	TC191852_1729_35_S
8.48	-2465	-4.08	0.00247	0.016727	16.61	0.00247	TC191853_1476_35_S
9.3	4422	7.12	4e-05	0.001872	50.71	4e-05	TC191854_967_40_S
10.91	-0.278	-0.46	0.65598	0.760701	0.21	0.65598	TC191855_1997_38_S
8.21	1187	2.07	0.06709	0.145925	4.27	0.06709	TC191856_1989_38_S
9.3	-0.038	-0.05	0.95988	0.974412	0	0.95988	TC191857_965_38_X2
9.01	1671	2.15	0.05886	0.132462	4.6	0.05886	TC191858_1202_40_S
7.89	-0.602	-0.94	0.3684	0.507497	0.89	0.3684	TC191859_1855_39_S
8.55	2176	3.5	0.00615	0.029278	12.26	0.00615	TC191860_1169_37_S
8.7	1806	3.05	0.01292	0.046272	9.31	0.01292	TC191861_2583_39_S
9.08	4218	5.31	0.0004	0.005888	28.18	0.0004	TC191862_1905_39_S
8.83	1353	2.26	0.04873	0.116257	5.1	0.04873	TC191863_1520_39_S
8.22	-0.567	-0.84	0.42408	0.560919	0.7	0.42408	TC191864_1844_40_S
8.67	2513	4.14	0.00223	0.015683	17.13	0.00223	TC191865_1187_40_S
12.39	-0.31	-0.52	0.61185	0.724986	0.28	0.61185	TC191866_1115_40_S
9.03	-0.224	-0.38	0.7106	0.803703	0.15	0.7106	TC191867_995_40_S
10.64	-1756	-2.87	0.01753	0.056588	8.22	0.01753	TC191868_1931_38_S
8.5	1382	1.47	0.17486	0.29473	2.15	0.17486	TC191869_1214_35_S
9.52	0.772	1.32	0.21695	0.345356	1.75	0.21695	TC191870_1899_40_S
8.63	-1178	-1.39	0.19477	0.319568	1.95	0.19477	TC191871_930_36_S
7.8	-1039	-1.81	0.1023	0.198996	3.27	0.1023	TC191872_1075_40_S
8.64	0.849	0.97	0.35499	0.494111	0.95	0.35499	TC191873_649_41_S
12.42	1964	2.73	0.02221	0.066844	7.44	0.02221	TC191874_1544_39_S
8.4	-0.09	-0.15	0.88319	0.925792	0.02	0.88319	TC191875_1253_35_S
8.77	1618	2.81	0.01918	0.060373	7.92	0.01918	TC191876_958_39_S
8.06	-0.541	-0.94	0.36901	0.508102	0.89	0.36901	TC191877_2030_41_S
7.59	-1136	-1.59	0.14537	0.257495	2.51	0.14537	TC191878_10_40_S
8.93	1054	1.82	0.10022	0.195977	3.31	0.10022	TC191879_1200_40_S
8.35	0.375	0.49	0.63654	0.744875	0.24	0.63654	TC191880_1519_34_X2
8.99	0.963	1.49	0.16788	0.286115	2.23	0.16788	TC191881_1142_39_S
8.45	0.439	0.75	0.46963	0.603256	0.57	0.46963	TC191882_1807_40_S
9.28	-1429	-2.24	0.05038	0.119137	5.01	0.05038	TC191883_655_34_X2
8.93	-0.435	-0.72	0.48834	0.619987	0.52	0.48834	TC191884_2069_40_S
7.77	-1435	-1.94	0.08202	0.169525	3.78	0.08202	TC191885_563_40_S
6.93	0.01	0.01	0.99232	0.995191	0	0.99232	TC191886_138_34_X2
8.77	1259	2	0.07444	0.157468	4.01	0.07444	TC191887_2028_38_S
8.01	1415	2.42	0.03716	0.095709	5.86	0.03716	TC191888_1046_39_S
8.65	0.698	1.16	0.27323	0.409067	1.35	0.27323	TC191889_1026_40_S
9.51	5513	9.59	0	0.000737	91.94	0	TC191890_1348_37_X3
8.96	0.415	0.71	0.49343	0.62508	0.51	0.49343	TC191891_2590_35_S
9.04	-0.248	-0.43	0.67697	0.777247	0.18	0.67697	TC191893_9_37_S
9.42	3499	5.16	0.0005	0.006546	26.64	0.0005	TC191894_3268_40_S
10.15	-0.884	-1.35	0.20917	0.336533	1.81	0.20917	TC191895_2163_35_S
7.74	-0.201	-0.3	0.7692	0.847396	0.09	0.7692	TC191896_1467_34_S
10.79	-0.078	-0.12	0.90686	0.940923	0.01	0.90686	TC191897_1586_40_S
7.78	-0.078	-0.12	0.90516	0.939817	0.01	0.90516	TC191898_1056_37_S
8.85	2.64	3.61	0.00514	0.026159	13.04	0.00514	TC191899_1358_35_S
8.11	0.177	0.31	0.76406	0.843384	0.1	0.76406	TC191900_1219_34_S
8.28	1969	3.13	0.01136	0.04272	9.78	0.01136	TC191901_1466_37_S
9.71	0.302	0.42	0.6837	0.782191	0.18	0.6837	TC191902_1222_35_S
7.39	4713	7.62	2e-05	0.001499	58.08	2e-05	TC191903_1354_40_S
6.92	-2601	-3.6	0.00527	0.02652	12.93	0.00527	TC191904_2241_41_S
8.2	0.294	0.48	0.64422	0.751143	0.23	0.64422	TC191905_1133_35_S
8.05	0.858	1.48	0.17081	0.289731	2.19	0.17081	TC191906_1077_41_X2
8.51	2451	3.83	0.00362	0.021052	14.67	0.00362	TC191907_929_40_S
9.37	-1.11	-1.88	0.09097	0.182829	3.53	0.09097	TC191908_165_38_S
9.38	0.804	1.39	0.19741	0.32243	1.92	0.19741	TC191909_1314_38_S
9.63	-2511	-4.29	0.00178	0.013774	18.37	0.00178	TC191910_2361_40_S
12.38	-1146	-1.93	0.0845	0.173067	3.71	0.0845	TC191911_1636_40_S
9.55	-1359	-1.6	0.1423	0.25354	2.56	0.1423	TC191912_909_35_S
8.82	1.55	2.18	0.0555	0.127272	4.75	0.0555	TC191913_1105_36_S
8.25	0.222	0.31	0.76372	0.84313	0.1	0.76372	TC191914_1828_38_S
8.37	1732	2.98	0.01453	0.049888	8.88	0.01453	TC191915_857_38_X2
10.9	3127	3.9	0.00404	0.022445	15.17	0.00404	TC191916_1341_38_S
8.25	0.254	0.42	0.68115	0.780523	0.18	0.68115	TC191917_1488_39_S
6.91	0.807	0.99	0.34713	0.486333	0.98	0.34713	TC191918_852_38_S
7.59	-0.197	-0.32	0.75377	0.836383	0.1	0.75377	TC191919_478_41_S
8.24	0.996	1.61	0.14074	0.251414	2.58	0.14074	TC191920_2251_36_S
11.4	0.36	0.61	0.55733	0.679832	0.37	0.55733	TC191921_1271_36_S
9.19	3463	5.39	0.00036	0.005622	29.01	0.00036	TC191922_997_38_S
6.88	0.863	1.28	0.23244	0.36319	1.63	0.23244	TC191923_115_37_S
7.26	NA	NA	NA	NA	NA	NA	TC191924_1424_41_S
10.15	1446	2.49	0.03332	0.088624	6.18	0.03332	TC191925_2014_40_S
8.39	-3298	-5.63	0.00026	0.004768	31.74	0.00026	TC191926_953_40_S
8.65	1762	2.49	0.033	0.088135	6.21	0.033	TC191927_2591_36_S
6.41	-1027	-1.24	0.24495	0.37746	1.54	0.24495	TC191928_455_41_X2
9.44	-1433	-2.29	0.04606	0.111706	5.25	0.04606	TC191929_76_41_S
8.59	-1	-1.57	0.14815	0.261151	2.48	0.14815	TC191930_880_34_X2
7.61	-1049	-1.67	0.12808	0.234758	2.78	0.12808	TC191931_6_37_S
11.18	-1412	-2.41	0.03814	0.097501	5.78	0.03814	TC191932_1991_35_S
10.31	-1018	-1.45	0.17817	0.299006	2.11	0.17817	TC191933_57_35_S
7.87	1.77	3.05	0.01295	0.046328	9.3	0.01295	TC191934_2195_40_S
7.99	-0.601	-0.84	0.42238	0.559673	0.7	0.42238	TC191935_1527_40_S
8.55	1681	2	0.07522	0.158631	3.99	0.07522	TC191936_3214_35_S
8.01	0.56	0.86	0.41309	0.550191	0.73	0.41309	TC191937_1173_40_S
7.46	1946	2.82	0.01911	0.060226	7.93	0.01911	TC191938_1593_39_S
7.45	-0.61	-1.03	0.33047	0.469679	1.05	0.33047	TC191939_1656_40_S
9.58	-1689	-2.79	0.02	0.062146	7.78	0.02	TC191940_861_34_X2
8.72	2346	3.52	0.00596	0.028718	12.39	0.00596	TC191941_1222_40_S
9.35	-0.272	-0.43	0.67848	0.778503	0.18	0.67848	TC191943_1395_40_S
7.95	-1.35	-2.33	0.04361	0.107129	5.41	0.04361	TC191944_125_39_S
11.75	0.712	1.14	0.2824	0.418501	1.3	0.2824	TC191945_325_40_S
7.41	-2752	-3.63	0.00597	0.028727	13.2	0.00597	TC191946_782_41_S
9.24	-0.694	-1.15	0.27728	0.413293	1.33	0.27728	TC191947_1199_34_X2
7.86	0.992	1.69	0.12347	0.228358	2.86	0.12347	TC191948_842_41_X2
7.91	0.069	0.1	0.92286	0.950514	0.01	0.92286	TC191950_2255_40_S
8.41	0.229	0.4	0.70051	0.795265	0.16	0.70051	TC191951_2467_40_S
9.81	-0.389	-0.61	0.55821	0.680417	0.37	0.55821	TC191952_1261_39_S
9.44	0.135	0.19	0.85601	0.907665	0.03	0.85601	TC191953_708_41_S
9.02	-0.306	-0.52	0.6153	0.728039	0.27	0.6153	TC191954_1120_36_S
9.51	5245	8.02	2e-05	0.001292	64.3	2e-05	TC191955_1450_35_X2
8.8	2034	3.37	0.00759	0.033253	11.37	0.00759	TC191956_1679_39_S
8.06	-0.257	-0.43	0.67604	0.776433	0.19	0.67604	TC191957_1152_35_S
9.27	1943	2.77	0.02063	0.0634	7.68	0.02063	TC191958_1719_40_S
9.08	1315	2.16	0.05758	0.130436	4.66	0.05758	TC191959_1739_36_S
8.31	-0.426	-0.6	0.5603	0.682316	0.36	0.5603	TC191960_1880_36_S
8.52	-2908	-4.74	0.00091	0.009329	22.43	0.00091	TC191961_1971_35_S
8.86	0.084	0.12	0.90533	0.939818	0.01	0.90533	TC191962_839_40_S
10.98	5.94	7.95	2e-05	0.001336	63.14	2e-05	TC191963_1058_37_S
9.4	2777	4.45	0.0014	0.01198	19.77	0.0014	TC191964_1151_39_S
7.1	-1143	-1.63	0.13466	0.243506	2.67	0.13466	TC191965_1078_35_S
7.63	-0.198	-0.3	0.76916	0.84739	0.09	0.76916	TC191966_237_36_S
10.79	2242	3.71	0.00438	0.02374	13.77	0.00438	TC191967_2341_35_S
7.99	3152	5.09	0.00055	0.00693	25.89	0.00055	TC191968_2638_40_S
9.8	1909	2.89	0.01694	0.055307	8.34	0.01694	TC191969_889_41_X2
8.6	1459	2.29	0.04607	0.111706	5.25	0.04607	TC191970_968_40_S
9.03	-1.58	-2.6	0.02735	0.077237	6.78	0.02735	TC191971_750_35_S
8.87	-0.392	-0.65	0.52879	0.655547	0.43	0.52879	TC191972_987_40_S
7.29	0.138	0.22	0.83015	0.88995	0.05	0.83015	TC191973_1331_40_S
9.25	0.706	0.89	0.39716	0.534705	0.79	0.39716	TC191974_1106_40_S
9.15	1176	1.59	0.14372	0.255347	2.54	0.14372	TC191975_1360_40_S
8.43	0.496	0.78	0.45482	0.589569	0.61	0.45482	TC191976_451_35_S
8.18	1988	3.02	0.01348	0.047507	9.15	0.01348	TC191977_1313_38_S
7.96	-1107	-1.72	0.11845	0.221342	2.94	0.11845	TC191978_628_40_S
9.79	0.635	1.09	0.30307	0.44088	1.19	0.30307	TC191979_1104_37_S
10.18	-0.667	-0.91	0.38542	0.523853	0.83	0.38542	TC191980_963_35_S
8.07	1946	3.32	0.00829	0.035013	11.01	0.00829	TC191981_1322_36_S
8.7	-1368	-1.87	0.09202	0.184441	3.51	0.09202	TC191982_801_38_S
7.98	0.87	1.44	0.18208	0.303598	2.07	0.18208	TC191983_2145_35_S
8.05	1668	2.68	0.02414	0.070608	7.17	0.02414	TC191984_678_39_S
7.72	0.417	0.64	0.53859	0.66412	0.41	0.53859	TC191985_859_35_S
9.25	3292	4.29	0.00176	0.01371	18.43	0.00176	TC191986_1436_35_S
7.99	1576	2.69	0.02376	0.069969	7.22	0.02376	TC191987_1285_38_S
9.23	-0.317	-0.45	0.66195	0.76544	0.2	0.66195	TC191988_753_35_S
8.02	0.954	1.62	0.13789	0.247626	2.62	0.13789	TC191989_1968_40_S
8.79	4196	5.65	0.00038	0.00575	31.89	0.00038	TC191990_995_40_S
8.71	1221	1.95	0.08171	0.169176	3.79	0.08171	TC191991_2034_40_S
9.52	2332	3.38	0.00754	0.033118	11.4	0.00754	TC191992_1677_38_S
9.62	0.495	0.78	0.45195	0.587048	0.62	0.45195	TC191993_1596_39_S
9.99	0.074	0.12	0.90534	0.939818	0.01	0.90534	TC191994_2163_35_S
8.09	-1014	-1.12	0.29488	0.432391	1.25	0.29488	TC191995_298_40_S
8.29	0.246	0.42	0.68085	0.780267	0.18	0.68085	TC191996_1738_36_X2
9.24	-0.063	-0.11	0.91593	0.946529	0.01	0.91593	TC191997_1060_38_S
9.93	-1466	-2.36	0.04087	0.102355	5.59	0.04087	TC191998_1284_40_S
8.91	0.753	1.01	0.34109	0.480189	1.02	0.34109	TC191999_2014_39_S
8.73	-0.038	-0.05	0.95823	0.973492	0	0.95823	TC192000_925_38_S
8.65	2119	3.57	0.0055	0.027236	12.74	0.0055	TC192001_1738_39_S
7.98	-1588	-2.51	0.03204	0.08636	6.29	0.03204	TC192002_986_37_S
10.19	1075	1.22	0.25036	0.383625	1.5	0.25036	TC192003_916_39_S
8.14	2034	3.36	0.0077	0.033571	11.32	0.0077	TC192004_2737_35_S
8.45	-1016	-1.13	0.28664	0.423394	1.27	0.28664	TC192005_2016_38_S
7.53	-0.438	-0.69	0.50939	0.638954	0.47	0.50939	TC192006_863_34_X3
9.24	4742	8.02	2e-05	0.001292	64.25	2e-05	TC192007_851_39_S
7.49	-3802	-6.36	0.0001	0.002873	40.43	0.0001	TC192008_507_35_S
8.76	0.559	0.88	0.40232	0.539788	0.77	0.40232	TC192009_1993_40_S
7.32	0.937	1.45	0.17939	0.300234	2.1	0.17939	TC192010_2055_40_S
7.65	5774	6.31	0.00011	0.002971	39.83	0.00011	TC192011_1037_36_S
9.63	-1595	-2.17	0.05619	0.128456	4.72	0.05619	TC192012_1504_40_S
8.82	-2948	-5.1	0.00054	0.006849	26.03	0.00054	TC192013_1196_38_S
8.44	2094	3.1	0.01191	0.043989	9.61	0.01191	TC192014_1817_39_S
9.73	0.474	0.78	0.45241	0.587357	0.61	0.45241	TC192016_952_40_S
8.74	0.602	0.95	0.36385	0.502946	0.91	0.36385	TC192017_673_35_S
10.33	2.89	4.79	0.00084	0.008945	22.95	0.00084	TC192018_1981_40_S
8.84	6409	9.5	0	0.000758	90.21	0	TC192019_932_37_X2
8.83	2309	3.53	0.00591	0.028565	12.43	0.00591	TC192020_2416_39_S
11.45	-1583	-2.19	0.0543	0.12528	4.81	0.0543	TC192021_371_41_X2
7.81	0.528	0.88	0.40188	0.539381	0.77	0.40188	TC192022_955_40_S
9.31	-2406	-4.03	0.00263	0.017392	16.28	0.00263	TC192023_936_40_S
6.78	1829	3.01	0.01377	0.048085	9.07	0.01377	TC192024_1257_38_S
9.04	1077	1.74	0.11345	0.21447	3.04	0.11345	TC192025_1151_39_S
7.77	-0.856	-1.34	0.21217	0.339911	1.79	0.21217	TC192026_1171_35_S
9.55	2234	3.69	0.0045	0.024144	13.65	0.0045	TC192027_234_41_S
6.61	-2754	-2.43	0.03926	0.099519	5.92	0.03926	TC192028_851_40_S
8.12	2352	3.34	0.00804	0.034407	11.14	0.00804	TC192029_938_40_S
9.66	2843	4.54	0.00122	0.011086	20.61	0.00122	TC192030_1042_40_S
8.41	2456	3.96	0.00296	0.018655	15.68	0.00296	TC192031_1967_39_S
9.19	1685	2.22	0.0522	0.122054	4.92	0.0522	TC192032_1611_40_S
8.64	1158	1.66	0.12935	0.236419	2.76	0.12935	TC192033_1442_38_S
8.38	-1506	-2.33	0.04312	0.106261	5.44	0.04312	TC192034_2556_34_S
9.95	1334	2.09	0.06441	0.141687	4.37	0.06441	TC192035_1175_40_S
8.58	-0.844	-1.39	0.19644	0.321279	1.93	0.19644	TC192036_25_38_S
6.61	0.059	0.05	0.95908	0.973915	0	0.95908	TC192037_1085_36_S
10	-0.15	-0.21	0.8361	0.894032	0.05	0.8361	TC192038_1274_38_S
10.38	0.135	0.22	0.82762	0.888167	0.05	0.82762	TC192039_2053_40_S
7.6	0.704	1.2	0.25864	0.393351	1.44	0.25864	TC192040_2217_36_S
11.16	-3181	-4.42	0.00145	0.01221	19.55	0.00145	TC192041_1263_37_S
8.42	-0.155	-0.24	0.81236	0.877945	0.06	0.81236	TC192042_826_41_S
8.86	4.6	6.09	0.00014	0.003494	37.06	0.00014	TC192043_591_40_X3
7.72	-0.676	-1.12	0.28917	0.426093	1.26	0.28917	TC192044_2006_34_X2
9.29	3289	5.58	0.00028	0.004921	31.09	0.00028	TC192045_1052_39_S
9.02	3036	4.99	0.00063	0.007499	24.89	0.00063	TC192046_2038_40_S
7.79	0.101	0.17	0.86802	0.915434	0.03	0.86802	TC192047_352_35_S
11.2	7.14	11.57	0	0.000579	133.86	0	TC192048_885_35_X3
10.38	1934	3.01	0.01375	0.048017	9.08	0.01375	TC192049_1645_40_S
8.99	0.011	0.02	0.98677	0.991519	0	0.98677	TC192050_1801_35_S
7.14	-1739	-2.39	0.03926	0.099519	5.7	0.03926	TC192051_596_35_S
8.36	1.58	2.7	0.02311	0.068686	7.31	0.02311	TC192052_581_40_X2
6.86	1365	1.89	0.08962	0.180981	3.57	0.08962	TC192054_1695_40_S
9.27	-0.054	-0.09	0.92875	0.95468	0.01	0.92875	TC192055_1481_40_S
6.65	-0.796	-0.93	0.37644	0.515343	0.86	0.37644	TC192056_727_35_S
8.89	-0.928	-1.59	0.14351	0.255166	2.54	0.14351	TC192057_2109_39_S
9.23	0.705	1.01	0.33866	0.47769	1.01	0.33866	TC192058_1249_40_S
8.25	-0.004	-0.01	0.99584	0.997564	0	0.99584	TC192059_984_40_S
7.68	1707	2.87	0.01736	0.056253	8.26	0.01736	TC192060_1273_40_S
10.12	3364	5.5	0.00031	0.005144	30.23	0.00031	TC192061_875_40_S
10.08	0.996	1.56	0.15056	0.264242	2.44	0.15056	TC192062_174_34_S
9.43	0.933	1.23	0.24788	0.380856	1.52	0.24788	TC192063_1590_40_S
7.41	-0.057	-0.09	0.92707	0.953431	0.01	0.92707	TC192064_1353_37_S
7.65	1328	2.19	0.05488	0.126293	4.78	0.05488	TC192065_1628_40_S
9.52	0.458	0.73	0.48302	0.61539	0.53	0.48302	TC192066_1076_40_S
8.18	1668	2.79	0.01995	0.062052	7.79	0.01995	TC192067_1660_40_S
9.46	2799	4.62	0.00108	0.01032	21.36	0.00108	TC192068_1915_40_S
8.94	NA	NA	NA	NA	NA	NA	TC192069_1759_40_S
8.29	-0.115	-0.19	0.85396	0.90639	0.04	0.85396	TC192070_1040_34_X2
7.9	-0.807	-1.4	0.19418	0.318764	1.95	0.19418	TC192071_2282_40_S
7.34	1146	1.55	0.15469	0.269608	2.39	0.15469	TC192072_759_40_S
9.41	1.81	2.12	0.06514	0.14287	4.48	0.06514	TC192073_1110_41_X2
8.15	1267	1.89	0.09015	0.18167	3.56	0.09015	TC192074_1018_39_S
7.63	-1.16	-1.73	0.11491	0.216446	3.01	0.11491	TC192075_1060_39_S
8.89	1999	3.2	0.01005	0.039529	10.25	0.01005	TC192076_2069_39_S
9.66	5.25	8.1	1e-05	0.001266	65.58	1e-05	TC192077_947_36_S
9.51	0.19	0.2	0.84191	0.898414	0.04	0.84191	TC192078_1524_40_S
8.95	-3.11	-5.14	0.00051	0.006645	26.47	0.00051	TC192079_1085_35_S
6.91	1757	2.08	0.06531	0.143102	4.34	0.06531	TC192080_534_41_X2
10.14	0.114	0.16	0.87717	0.921633	0.03	0.87717	TC192081_602_40_S
7.89	1358	2.35	0.04216	0.104552	5.5	0.04216	TC192082_1395_40_S
10.13	-1114	-1.83	0.09834	0.193199	3.36	0.09834	TC192083_529_40_S
8.17	-1175	-1.16	0.27481	0.41083	1.34	0.27481	TC192084_676_40_S
11.51	1045	1.43	0.18575	0.308291	2.03	0.18575	TC192085_1072_40_S
10.51	-1886	-2.99	0.01438	0.049583	8.92	0.01438	TC192086_386_34_S
8.22	1959	3.34	0.00797	0.034187	11.17	0.00797	TC192087_2061_40_S
9.26	1758	2.77	0.02062	0.0634	7.68	0.02062	TC192088_1202_39_S
11.24	-0.686	-1.2	0.26093	0.396007	1.43	0.26093	TC192089_955_37_S
8.68	-0.571	-0.77	0.45717	0.591642	0.6	0.45717	TC192090_1538_40_S
7.94	3.66	5.73	0.00023	0.004448	32.88	0.00023	TC192091_1099_39_S
8.29	2051	2.99	0.01427	0.049325	8.95	0.01427	TC192092_3871_40_S
9.05	-1928	-3.12	0.01145	0.042914	9.75	0.01145	TC192093_906_35_X2
9.01	1225	2.12	0.06163	0.137095	4.48	0.06163	TC192094_1357_40_S
10.75	3192	4.99	0.00063	0.007501	24.87	0.00063	TC192095_1135_40_S
8.25	1925	3.07	0.01255	0.045447	9.41	0.01255	TC192096_2046_35_S
8.82	0.368	0.6	0.56481	0.685943	0.36	0.56481	TC192097_1167_40_S
8.29	1198	2.02	0.07247	0.154509	4.08	0.07247	TC192098_2100_39_S
9.43	5.25	9.02	1e-05	0.000882	81.38	1e-05	TC192100_1014_38_S
8.26	2326	3.43	0.00689	0.031414	11.78	0.00689	TC192101_990_37_S
11.02	3981	5.42	0.00034	0.005445	29.42	0.00034	TC192102_1602_40_S
9.43	3277	4.48	0.00134	0.011713	20.04	0.00134	TC192103_2178_40_S
9.23	-0.564	-0.81	0.44038	0.576216	0.65	0.44038	TC192104_850_35_S
7.01	-0.404	-0.65	0.52906	0.655808	0.43	0.52906	TC192105_80_41_S
8.39	-1131	-1.66	0.12987	0.237136	2.75	0.12987	TC192106_1660_40_S
9.02	3707	6.09	0.00014	0.003494	37.05	0.00014	TC192107_1037_35_S
8.39	1006	1.67	0.12816	0.234856	2.78	0.12816	TC192108_1808_37_S
9.38	3137	3.57	0.00549	0.027181	12.76	0.00549	TC192109_989_40_S
9.85	-0.157	-0.27	0.79229	0.86468	0.07	0.79229	TC192110_2004_39_S
11.37	5188	8.26	1e-05	0.001186	68.22	1e-05	TC192111_1524_40_S
9.87	2089	3.55	0.00568	0.027826	12.61	0.00568	TC192112_1457_37_S
8.64	2758	4.43	0.00143	0.012142	19.62	0.00143	TC192113_1904_40_S
7.46	-1.7	-2.63	0.02614	0.074744	6.92	0.02614	TC192114_827_39_S
7.61	-0.483	-0.84	0.42234	0.55965	0.7	0.42234	TC192115_1128_40_S
7.41	2497	3.96	0.00297	0.018699	15.66	0.00297	TC192116_1851_37_S
9.31	-1081	-1.85	0.0952	0.188886	3.43	0.0952	TC192117_1775_35_S
6.95	-0.369	-0.4	0.69952	0.794664	0.16	0.69952	TC192118_1568_40_S
9.43	-2371	-3.94	0.00303	0.018941	15.56	0.00303	TC192119_1044_35_S
10.67	0.115	0.18	0.85817	0.909246	0.03	0.85817	TC192120_1033_36_S
9.29	0.647	0.8	0.44543	0.581098	0.63	0.44543	TC192121_1191_37_S
10.08	6997	10.72	0	0.000629	114.83	0	TC192122_696_39_S
9.51	-2.09	-3.32	0.00822	0.034859	11.05	0.00822	TC192123_35_34_S
12.42	0.307	0.48	0.64123	0.748662	0.23	0.64123	TC192124_1739_39_S
8.93	1254	1.72	0.11684	0.219027	2.97	0.11684	TC192125_1927_35_S
8.26	0.483	0.82	0.43142	0.567769	0.67	0.43142	TC192126_851_40_S
7.39	-0.323	-0.35	0.73303	0.82099	0.13	0.73303	TC192127_469_41_S
9.38	-0.233	-0.38	0.71439	0.806511	0.14	0.71439	TC192128_2728_35_S
7.76	-0.281	-0.46	0.65575	0.760485	0.21	0.65575	TC192129_2402_38_S
8.07	0.555	0.87	0.40616	0.543575	0.76	0.40616	TC192130_1787_39_S
8.84	2901	4.64	0.00105	0.0102	21.49	0.00105	TC192131_2608_40_S
12.04	-1536	-2.33	0.04355	0.107039	5.41	0.04355	TC192132_2318_40_S
9.25	1351	1.74	0.11387	0.215015	3.03	0.11387	TC192133_2113_39_S
7.72	-0.967	-1.12	0.29407	0.431503	1.25	0.29407	TC192134_281_39_S
7.32	-0.257	-0.39	0.70573	0.799688	0.15	0.70573	TC192135_1591_35_S
9.43	4413	5.68	0.00024	0.00463	32.24	0.00024	TC192136_2282_40_S
8.24	-0.502	-0.81	0.43566	0.571897	0.66	0.43566	TC192137_669_34_S
7.35	0.053	0.06	0.95206	0.969558	0	0.95206	TC192138_218_41_S
8.73	3606	5.81	0.00021	0.004252	33.77	0.00021	TC192139_914_36_S
9.02	-2127	-3.52	0.00599	0.028786	12.37	0.00599	TC192140_1637_37_S
11.77	-0.866	-1.47	0.17269	0.291898	2.17	0.17269	TC192141_1291_40_S
11.47	-0.401	-0.66	0.52248	0.649941	0.44	0.52248	TC192142_1743_40_S
9.3	-1841	-2.98	0.01448	0.04979	8.89	0.01448	TC192143_1820_39_S
8.76	2114	3.38	0.00747	0.032929	11.44	0.00747	TC192144_2865_37_S
8.98	3.99	6.67	7e-05	0.002342	44.52	7e-05	TC192145_1166_37_S
12.44	1209	1.89	0.08962	0.180981	3.57	0.08962	TC192146_1513_35_S
9.5	2235	2.94	0.0155	0.052031	8.65	0.0155	TC192147_1620_35_S
12.27	3388	5.55	0.00029	0.00496	30.84	0.00029	TC192148_947_38_S
9.96	0.657	0.89	0.39474	0.532549	0.79	0.39474	TC192149_1199_34_X2
8.49	0.849	1.3	0.22504	0.354994	1.68	0.22504	TC192150_2654_40_S
9.46	2168	2.64	0.02592	0.07432	6.94	0.02592	TC192151_1785_40_S
10	-1034	-1.57	0.14959	0.263014	2.46	0.14959	TC192152_50_35_S
9.2	-1288	-1.59	0.14387	0.255488	2.54	0.14387	TC192153_1163_38_S
8.57	0.252	0.43	0.67481	0.775459	0.19	0.67481	TC192154_1332_40_S
8.83	-1361	-2.29	0.04607	0.111706	5.25	0.04607	TC192155_1207_39_S
9.28	1193	1.93	0.08422	0.172615	3.72	0.08422	TC192156_1492_40_S
8.55	1469	2.45	0.03554	0.092712	5.99	0.03554	TC192157_1127_40_S
9	2489	4.33	0.00166	0.013248	18.78	0.00166	TC192158_1239_37_S
11.61	2101	2.91	0.01629	0.053827	8.48	0.01629	TC192159_1481_36_S
7.49	0.332	0.56	0.58763	0.70466	0.31	0.58763	TC192160_1197_40_S
8.2	3532	5.98	0.00016	0.003808	35.8	0.00016	TC192161_835_40_S
9.52	2.58	4.1	0.00239	0.016409	16.78	0.00239	TC192162_885_37_X2
8.89	1497	2.27	0.04782	0.114599	5.15	0.04782	TC192163_894_37_S
9.29	-0.704	-1.15	0.27833	0.41429	1.32	0.27833	TC192164_1801_40_S
10.7	1825	3.09	0.01202	0.044254	9.57	0.01202	TC192165_1336_35_S
8.2	0.362	0.42	0.6842	0.782448	0.18	0.6842	TC192166_225_34_X2
8.05	4236	7.03	5e-05	0.001945	49.48	5e-05	TC192168_1937_40_S
9.23	2014	3.45	0.0067	0.030889	11.89	0.0067	TC192169_1391_37_S
8.39	2374	3.78	0.0039	0.022006	14.32	0.0039	TC192170_1085_37_S
9.63	-0.994	-1.52	0.1605	0.277001	2.32	0.1605	TC192171_1338_37_S
11.61	4583	7.95	2e-05	0.001336	63.17	2e-05	TC192172_1167_40_S
8.46	1738	2.37	0.04046	0.101648	5.62	0.04046	TC192173_172_40_S
6.5	-3097	-3.41	0.00835	0.035147	11.65	0.00835	TC192174_1281_40_S
9.4	-1879	-3.11	0.0118	0.043775	9.64	0.0118	TC192175_877_35_S
8.09	1653	2.86	0.01787	0.05735	8.16	0.01787	TC192176_1655_39_S
9.89	1841	2.8	0.01961	0.061315	7.85	0.01961	TC192177_1455_39_X2
8.46	1286	1.79	0.10557	0.203589	3.2	0.10557	TC192178_2246_36_S
8.81	0.829	1.05	0.32029	0.459229	1.1	0.32029	TC192179_1800_38_S
8.85	2538	3.82	0.0037	0.021288	14.58	0.0037	TC192180_1153_40_X2
8.75	3181	5.02	0.0006	0.007264	25.23	0.0006	TC192181_1434_40_S
9.08	-0.483	-0.67	0.52083	0.648228	0.44	0.52083	TC192182_1171_37_S
9.67	2048	2.07	0.06632	0.144695	4.3	0.06632	TC192183_2126_39_S
7.21	-1794	-2.01	0.07354	0.156099	4.04	0.07354	TC192184_1256_41_S
7.82	-2917	-3.91	0.00394	0.022138	15.31	0.00394	TC192186_812_40_S
8.43	1147	1.85	0.09482	0.188383	3.44	0.09482	TC192187_1125_40_S
7.86	2.3	3.86	0.00346	0.020532	14.89	0.00346	TC192188_2218_38_S
8.4	-0.275	-0.44	0.66668	0.769223	0.2	0.66668	TC192189_2503_37_S
8.88	0.525	0.87	0.40669	0.543947	0.75	0.40669	TC192190_1544_34_X2
9.79	1.57	2.39	0.03929	0.099535	5.7	0.03929	TC192191_1885_40_S
10.64	0.11	0.17	0.86944	0.916372	0.03	0.86944	TC192192_1223_40_S
10.77	-1373	-2.28	0.04717	0.113562	5.19	0.04717	TC192193_836_34_X2
10.63	4566	6.91	5e-05	0.002055	47.69	5e-05	TC192194_804_40_S
11.7	2371	3.87	0.00339	0.020226	15	0.00339	TC192195_753_39_X2
9.33	0.306	0.5	0.62737	0.737171	0.25	0.62737	TC192196_1934_35_S
7.12	0.436	0.65	0.53022	0.656773	0.42	0.53022	TC192197_851_34_X2
10.02	1829	3.09	0.01213	0.044521	9.54	0.01213	TC192198_2024_35_S
9.38	1379	2.38	0.03993	0.100606	5.65	0.03993	TC192199_1946_40_S
7.74	1519	2.38	0.03954	0.099983	5.68	0.03954	TC192200_1482_40_S
10.47	3287	4.29	0.00178	0.013771	18.38	0.00178	TC192201_1478_39_S
7.7	0.161	0.26	0.8007	0.870391	0.07	0.8007	TC192202_2544_40_S
8.22	-2108	-3.57	0.00547	0.027108	12.77	0.00547	TC192203_78_41_S
8.65	2438	3.58	0.0054	0.02687	12.83	0.0054	TC192204_2657_40_S
12.42	0.372	0.62	0.54832	0.671915	0.39	0.54832	TC192205_1822_40_S
8.76	2133	3.3	0.00858	0.035722	10.87	0.00858	TC192206_2330_38_S
9.48	2144	3.59	0.00532	0.026667	12.89	0.00532	TC192207_1880_40_S
8.42	1896	2.62	0.02673	0.076022	6.85	0.02673	TC192208_1696_38_S
9.73	0.356	0.53	0.60524	0.719582	0.29	0.60524	TC192209_1666_40_S
8.32	0.486	0.73	0.48531	0.617539	0.53	0.48531	TC192210_1221_39_S
11.86	-1.99	-3.06	0.01263	0.045677	9.39	0.01263	TC192211_691_40_S
9.18	1676	2.41	0.03808	0.097391	5.79	0.03808	TC192212_2933_40_S
9.67	3.8	5.98	0.00017	0.003827	35.71	0.00017	TC192213_889_40_S
8.65	1879	3.21	0.00992	0.03917	10.3	0.00992	TC192214_1250_35_S
7.75	-1419	-1.84	0.09677	0.190996	3.39	0.09677	TC192215_1817_37_S
6.43	-0.652	-0.56	0.59099	0.707383	0.31	0.59099	TC192216_81_34_S
11.94	-0.808	-1.36	0.20627	0.332998	1.84	0.20627	TC192218_1336_40_S
8	0.378	0.63	0.54433	0.668921	0.4	0.54433	TC192219_879_38_S
7.72	-0.015	-0.02	0.98782	0.992	0	0.98782	TC192220_1146_40_S
12.17	2492	4.22	0.00198	0.014644	17.77	0.00198	TC192221_1138_38_S
7.6	-0.203	-0.29	0.77649	0.852102	0.09	0.77649	TC192223_1253_39_S
8.1	0.751	1.3	0.22307	0.352676	1.7	0.22307	TC192224_1169_40_S
7.95	-0.725	-1.16	0.27237	0.408234	1.36	0.27237	TC192225_992_37_S
6.65	-4048	-4.56	0.00119	0.010947	20.75	0.00119	TC192226_1657_40_S
9.88	3773	4.89	0.00073	0.008184	23.87	0.00073	TC192227_1687_35_S
10.82	0.621	1.08	0.30744	0.445559	1.16	0.30744	TC192228_712_36_S
9.56	4353	7.2	4e-05	0.001804	51.82	4e-05	TC192229_1732_35_S
7.82	-0.347	-0.45	0.66195	0.76544	0.2	0.66195	TC192230_1142_34_X2
8.04	-0.318	-0.43	0.67995	0.779668	0.18	0.67995	TC192231_251_39_S
8.59	4363	6.69	7e-05	0.002321	44.74	7e-05	TC192232_1702_39_S
9.46	0.224	0.3	0.76694	0.845567	0.09	0.76694	TC192233_1978_35_S
9.53	-0.196	-0.25	0.80739	0.874555	0.06	0.80739	TC192234_1274_37_S
11.89	1032	1.78	0.10744	0.206111	3.16	0.10744	TC192235_2355_40_S
9.25	0.939	1.37	0.20197	0.327641	1.88	0.20197	TC192236_2486_40_S
8.51	2143	3.7	0.00449	0.024105	13.66	0.00449	TC192237_2290_37_S
8.99	1505	2.62	0.02662	0.075773	6.86	0.02662	TC192238_1646_35_S
9.66	2.15	3.41	0.00714	0.032063	11.63	0.00714	TC192239_1668_38_S
7.99	2171	3.6	0.00523	0.02639	12.97	0.00523	TC192240_1908_40_S
8.23	1519	2.06	0.06744	0.146493	4.26	0.06744	TC192241_1059_39_S
10.38	-0.632	-1.07	0.30984	0.448398	1.15	0.30984	TC192242_1807_36_S
9.46	2043	3.03	0.01346	0.047454	9.16	0.01346	TC192243_1912_40_S
9.31	-1025	-1.75	0.11272	0.213387	3.05	0.11272	TC192244_655_40_S
9.1	-0.047	-0.08	0.93866	0.961273	0.01	0.93866	TC192245_2552_40_S
11.15	1732	2.96	0.01503	0.050976	8.76	0.01503	TC192246_1529_40_S
8.97	0.358	0.61	0.55362	0.676498	0.38	0.55362	TC192247_623_38_X2
9.03	3175	4.62	0.00109	0.010358	21.31	0.00109	TC192248_1952_40_S
11.57	2701	3.85	0.0035	0.020626	14.85	0.0035	TC192249_1518_40_S
7.96	0.394	0.48	0.64358	0.750608	0.23	0.64358	TC192250_168_35_S
9.26	1208	1.93	0.08356	0.17156	3.73	0.08356	TC192251_2783_35_S
8.92	-1.19	-2.01	0.07364	0.156266	4.04	0.07364	TC192252_871_35_S
6.42	-3082	-3.39	0.00864	0.035872	11.5	0.00864	TC192254_2865_35_S
9.31	1341	2.19	0.05501	0.126432	4.78	0.05501	TC192255_1290_40_S
7.5	-0.96	-1.65	0.13181	0.239855	2.72	0.13181	TC192256_1296_40_S
9.33	0.194	0.32	0.75771	0.838747	0.1	0.75771	TC192257_1801_40_S
8.62	2087	3.47	0.0065	0.030317	12.02	0.0065	TC192258_914_39_X2
11.14	3945	6.73	7e-05	0.002256	45.31	7e-05	TC192259_1168_40_S
10.66	1709	2.55	0.02986	0.082086	6.51	0.02986	TC192260_1438_37_S
10.01	-0.717	-1.25	0.24212	0.374239	1.56	0.24212	TC192261_823_40_S
7.71	1597	2.43	0.03636	0.094244	5.92	0.03636	TC192262_1445_40_S
8.78	0.529	0.87	0.40758	0.544897	0.75	0.40758	TC192263_1172_40_S
10.68	0.878	1.39	0.19734	0.322329	1.92	0.19734	TC192264_1874_40_S
9.22	2332	4.02	0.0027	0.017662	16.14	0.0027	TC192265_1612_36_S
6.78	-0.41	-0.47	0.6463	0.752524	0.22	0.6463	TC192266_1123_40_S
9.65	-0.197	-0.25	0.80468	0.873032	0.06	0.80468	TC192267_2053_35_S
5.57	-2426	-1.75	0.11508	0.216673	3.08	0.11508	TC192268_387_34_S
7.93	0.545	0.94	0.37062	0.509573	0.88	0.37062	TC192269_908_40_S
8.88	0.433	0.75	0.4695	0.603176	0.57	0.4695	TC192270_1971_40_S
9.66	0.151	0.21	0.83528	0.893665	0.05	0.83528	TC192271_1609_40_S
8.86	1476	2.38	0.03983	0.100443	5.66	0.03983	TC192272_1078_39_S
10.28	2988	2.87	0.01742	0.056385	8.25	0.01742	TC192273_10_34_S
8.54	-0.664	-1.13	0.28742	0.424175	1.27	0.28742	TC192274_1026_35_S
10.5	2378	2.94	0.0155	0.052031	8.65	0.0155	TC192275_1234_39_S
7.89	1685	2.8	0.01961	0.061313	7.85	0.01961	TC192276_853_40_S
6.62	1.21	1.87	0.09211	0.184507	3.51	0.09211	TC192277_2086_39_S
7.06	1524	2.22	0.05235	0.122257	4.91	0.05235	TC192278_2088_37_S
9.44	-0.012	-0.02	0.98642	0.991306	0	0.98642	TC192280_2186_38_S
8.54	1667	1.98	0.07731	0.161997	3.92	0.07731	TC192281_137_40_S
7.65	-3113	-5.17	0.00049	0.006482	26.77	0.00049	TC192282_1773_35_S
6.64	0.178	0.13	0.89815	0.935393	0.02	0.89815	TC192283_53_41_S
9.52	3475	5.76	0.00022	0.004401	33.13	0.00022	TC192284_1407_38_S
9.51	-3003	-4.82	0.00081	0.008705	23.23	0.00081	TC192285_114_41_S
7.91	1908	2.83	0.01857	0.058936	8.03	0.01857	TC192286_772_41_X2
7.51	-0.802	-1.17	0.27139	0.40739	1.36	0.27139	TC192287_1672_34_S
7.97	1681	2.73	0.02223	0.066866	7.43	0.02223	TC192288_996_39_S
9.02	2782	3.49	0.00744	0.032847	12.17	0.00744	TC192289_1903_40_S
10.56	-1081	-1.66	0.13028	0.237632	2.74	0.13028	TC192290_970_38_S
7.59	0.739	1.23	0.24825	0.381275	1.51	0.24825	TC192291_1715_40_S
8.41	2002	3.04	0.01309	0.046622	9.26	0.01309	TC192292_1560_39_S
7.4	-0.56	-0.78	0.45629	0.590978	0.6	0.45629	TC192293_2066_37_S
7.46	-1625	-2.81	0.01944	0.060959	7.88	0.01944	TC192294_2653_40_S
9.21	2812	4.7	0.00096	0.009623	22.11	0.00096	TC192295_919_40_S
8.33	2133	3.45	0.00668	0.030796	11.91	0.00668	TC192296_1169_40_S
9.15	2306	3.84	0.00355	0.020811	14.77	0.00355	TC192297_1343_40_S
7.69	2184	2.74	0.02412	0.07057	7.49	0.02412	TC192298_1017_34_X2
9.48	2617	4.29	0.00177	0.013722	18.41	0.00177	TC192299_2161_39_S
7.91	2999	4.2	0.00203	0.014833	17.65	0.00203	TC192300_1294_41_X2
7.91	3146	4.18	0.0021	0.015143	17.46	0.0021	TC192301_1568_40_S
8.5	0.133	0.18	0.86305	0.91258	0.03	0.86305	TC192302_344_37_S
9.06	2275	2.98	0.01631	0.053876	8.9	0.01631	TC192303_1161_40_S
8.09	-0.434	-0.72	0.48766	0.619535	0.52	0.48766	TC192304_1002_38_S
9.07	-0.206	-0.31	0.7612	0.841266	0.1	0.7612	TC192305_1500_36_S
10.02	2.36	3.42	0.00699	0.031632	11.72	0.00699	TC192306_1650_37_S
8.78	0.476	0.74	0.47824	0.611042	0.54	0.47824	TC192307_1003_39_S
8.58	0.277	0.48	0.6437	0.750678	0.23	0.6437	TC192308_1242_39_S
9.57	0.471	0.78	0.45182	0.587037	0.62	0.45182	TC192309_2809_40_S
9.5	2363	3.93	0.00311	0.019223	15.43	0.00311	TC192310_1096_40_S
11.54	-2393	-4.05	0.00256	0.017121	16.42	0.00256	TC192311_827_38_S
9.94	-1026	-1.64	0.1328	0.241008	2.7	0.1328	TC192312_189_41_S
7.87	-0.218	-0.31	0.763	0.842518	0.1	0.763	TC192314_1556_39_S
8.16	-0.273	-0.4	0.69451	0.790084	0.16	0.69451	TC192315_1553_37_S
8.05	-1952	-3.29	0.00864	0.03589	10.84	0.00864	TC192316_31_41_S
8.77	-1974	-3.33	0.00809	0.034502	11.11	0.00809	TC192317_1234_35_S
9.11	-1259	-2.01	0.07302	0.155342	4.06	0.07302	TC192318_939_35_S
7.35	0.1	0.15	0.88124	0.924236	0.02	0.88124	TC192319_1038_38_X2
8.99	1214	1.77	0.10834	0.2075	3.14	0.10834	TC192320_1376_39_S
11.03	-4808	-6.28	0.00011	0.003048	39.4	0.00011	TC192321_1649_35_S
10.64	2113	2.78	0.02019	0.062525	7.75	0.02019	TC192322_914_37_S
8.19	1843	3.16	0.0108	0.041464	9.98	0.0108	TC192323_1303_40_S
8.57	1381	2.3	0.04512	0.10994	5.31	0.04512	TC192324_1827_40_S
7.78	-2.04	-2.99	0.01431	0.049448	8.93	0.01431	TC192325_57_34_S
9.47	0.746	1.28	0.22997	0.360433	1.64	0.22997	TC192326_2360_38_S
7.63	2504	3.32	0.00968	0.038587	11	0.00968	TC192327_3126_39_S
9.2	3697	4.63	0.00107	0.010292	21.39	0.00107	TC192328_892_41_X2
8.57	2876	4.88	0.00074	0.008269	23.77	0.00074	TC192329_1103_39_S
11.74	-0.31	-0.43	0.67665	0.776975	0.19	0.67665	TC192330_886_40_S
9.02	0.315	0.51	0.61843	0.730351	0.27	0.61843	TC192331_1437_40_S
10.68	4034	4.7	0.00096	0.00964	22.07	0.00096	TC192332_813_40_S
9.77	1.16	1.5	0.16601	0.28391	2.25	0.16601	TC192333_1613_38_S
9.17	1722	2.27	0.0476	0.1142	5.17	0.0476	TC192334_1275_39_S
8.1	1559	2.56	0.02952	0.081433	6.54	0.02952	TC192335_1739_38_S
9.66	-1648	-2.56	0.02921	0.080886	6.57	0.02921	TC192336_2208_38_S
9.71	2892	3.9	0.00327	0.01979	15.18	0.00327	TC192337_2123_38_S
9.11	0.456	0.74	0.47563	0.6087	0.55	0.47563	TC192338_1147_35_S
8.57	2492	3.07	0.01258	0.045556	9.4	0.01258	TC192339_1158_40_S
12.27	0.148	0.23	0.82191	0.884478	0.05	0.82191	TC192340_2187_40_S
9.71	-2176	-3.41	0.00709	0.031957	11.65	0.00709	TC192341_1815_40_S
7.66	-0.199	-0.34	0.7396	0.825913	0.12	0.7396	TC192342_985_40_S
9.28	3.83	3.37	0.00762	0.033352	11.36	0.00762	TC192343_2526_38_S
8.96	-0.333	-0.56	0.5873	0.704398	0.32	0.5873	TC192344_2075_37_S
7.88	1307	2.12	0.06132	0.136578	4.5	0.06132	TC192345_1223_40_S
9.05	-1.78	-3.08	0.01239	0.045129	9.46	0.01239	TC192346_580_34_S
7.1	-0.445	-0.77	0.45994	0.594238	0.59	0.45994	TC192347_1660_38_S
8.36	1317	2.26	0.04863	0.11607	5.11	0.04863	TC192348_1288_35_S
11.47	-2386	-3.89	0.00329	0.019842	15.15	0.00329	TC192349_905_37_X2
9.92	3025	5.04	0.00059	0.007175	25.38	0.00059	TC192350_791_40_S
9.72	-1328	-2.31	0.04498	0.109688	5.32	0.04498	TC192351_1752_40_S
8.97	-0.904	-1.54	0.15629	0.271478	2.37	0.15629	TC192352_1584_40_S
7.8	1291	1.43	0.18355	0.305575	2.06	0.18355	TC192353_1512_39_S
8.21	-0.334	-0.51	0.62094	0.732354	0.26	0.62094	TC192354_1100_40_S
11.44	-1728	-2.96	0.0151	0.051109	8.74	0.0151	TC192355_1231_40_S
9.23	-0.652	-1.08	0.30677	0.444941	1.17	0.30677	TC192356_4850_38_S
8.51	1.98	3.07	0.01245	0.045235	9.44	0.01245	TC192357_621_38_S
8.62	-1438	-2.1	0.06323	0.139768	4.42	0.06323	TC192359_800_41_S
9.05	2751	3.13	0.01137	0.042735	9.78	0.01137	TC192360_2283_38_S
8.42	1997	3.36	0.00779	0.033784	11.26	0.00779	TC192361_1146_40_S
9.86	4894	6.45	9e-05	0.002728	41.56	9e-05	TC192362_1132_36_S
9.95	1422	2.09	0.06466	0.142021	4.36	0.06466	TC192363_2176_40_S
8.63	1107	1.55	0.15457	0.269477	2.39	0.15457	TC192364_506_38_S
8.89	0.86	1.39	0.19513	0.319811	1.94	0.19513	TC192365_2788_40_S
9	1.98	3.01	0.01384	0.048241	9.05	0.01384	TC192366_984_40_S
9.7	1276	1.72	0.11705	0.219236	2.97	0.11705	TC192367_1323_38_S
12.11	3721	5.9	0.00018	0.00405	34.76	0.00018	TC192368_1423_35_S
7.71	0.18	0.25	0.80636	0.873869	0.06	0.80636	TC192369_1135_37_S
9.52	1049	1.83	0.09898	0.194231	3.34	0.09898	TC192370_1081_38_S
11.55	-1957	-3	0.0141	0.048882	8.99	0.0141	TC192371_292_37_X2
9.39	-1518	-2.48	0.0336	0.08911	6.15	0.0336	TC192372_2032_40_S
8.42	1851	3.2	0.01008	0.039568	10.24	0.01008	TC192373_848_34_X2
9.03	0.948	1.25	0.24578	0.378374	1.55	0.24578	TC192374_1976_40_S
7.52	-0.75	-0.85	0.4177	0.554754	0.72	0.4177	TC192375_1790_35_S
8.53	2113	3.1	0.01183	0.043842	9.63	0.01183	TC192376_769_35_S
9.11	-3039	-5.14	0.00051	0.006678	26.38	0.00051	TC192378_825_34_S
9.25	3387	4.22	0.00198	0.01463	17.79	0.00198	TC192379_750_38_X2
9.29	5001	8.07	1e-05	0.001266	65.18	1e-05	TC192380_1023_41_X4
8.46	0.759	1.29	0.22636	0.356513	1.67	0.22636	TC192381_1118_37_S
7.6	-0.101	-0.16	0.87581	0.920723	0.03	0.87581	TC192382_2347_40_S
5.29	-2401	-1.58	0.14982	0.263288	2.5	0.14982	TC192383_79_36_S
10.35	0.237	0.41	0.69335	0.789285	0.17	0.69335	TC192384_835_39_S
9.68	1131	1.54	0.15527	0.270262	2.38	0.15527	TC192385_1090_37_S
7.8	0.307	0.52	0.61304	0.725899	0.27	0.61304	TC192386_1207_40_S
6.74	-0.877	-1.16	0.2758	0.411843	1.34	0.2758	TC192387_1317_40_S
10.12	0.517	0.8	0.44248	0.578254	0.64	0.44248	TC192388_1226_35_S
8.5	1859	2.7	0.02311	0.068686	7.31	0.02311	TC192389_1050_37_S
8.36	2526	3.85	0.00354	0.02078	14.79	0.00354	TC192390_984_40_S
9.18	0.303	0.4	0.69891	0.794086	0.16	0.69891	TC192391_1278_38_S
9.34	0.96	1.64	0.13338	0.241745	2.69	0.13338	TC192392_1198_40_S
8.19	0.632	0.96	0.3611	0.500193	0.92	0.3611	TC192393_1112_40_S
9.19	6012	9.13	1e-05	0.00084	83.32	1e-05	TC192394_2565_40_S
7.66	3568	5.57	0.00028	0.00494	30.98	0.00028	TC192395_1020_40_S
8.74	-0.571	-0.69	0.50443	0.634667	0.48	0.50443	TC192396_810_34_X2
7.56	0.761	1.27	0.23538	0.366414	1.6	0.23538	TC192397_1919_39_S
7.16	-0.795	-0.89	0.39937	0.536681	0.79	0.39937	TC192398_1744_35_S
9.61	2672	4.65	0.00103	0.010031	21.63	0.00103	TC192399_1021_41_X2
8.17	1078	1.82	0.1001	0.195824	3.32	0.1001	TC192400_1084_38_S
8.09	1727	2.93	0.01584	0.052794	8.58	0.01584	TC192401_1902_40_S
10.62	2934	4.27	0.00183	0.013992	18.22	0.00183	TC192402_1775_40_S
9.85	-1.59	-2.71	0.02267	0.067841	7.37	0.02267	TC192403_1183_34_S
8.55	0.064	0.11	0.91731	0.94722	0.01	0.91731	TC192404_2064_40_S
9.27	3669	5.3	0.00041	0.005911	28.09	0.00041	TC192406_914_35_S
9.43	3286	5.19	0.00048	0.006389	26.94	0.00048	TC192407_1114_40_S
8.28	3676	4.8	0.00083	0.008878	23.03	0.00083	TC192408_1241_36_S
7.18	2.62	3.22	0.00971	0.038646	10.39	0.00971	TC192409_1804_36_S
7.45	-1429	-1.46	0.17569	0.295742	2.14	0.17569	TC192410_972_40_S
8.65	-0.249	-0.42	0.68569	0.783471	0.17	0.68569	TC192411_1322_35_S
8.73	1698	2.55	0.02992	0.08216	6.5	0.02992	TC192412_989_38_S
8.84	2003	2.54	0.03033	0.083037	6.46	0.03033	TC192413_106_39_X2
8.89	-0.869	-1.48	0.17172	0.290859	2.18	0.17172	TC192414_1075_38_S
8.68	0.197	0.32	0.75913	0.839858	0.1	0.75913	TC192415_1371_35_S
8.81	1904	3.3	0.00853	0.035585	10.9	0.00853	TC192416_1397_40_S
8.17	0.689	1.15	0.27683	0.412877	1.33	0.27683	TC192417_1653_38_S
9.13	5407	5.95	0.00017	0.00388	35.41	0.00017	TC192419_824_41_X3
7.68	-2.07	-3.27	0.00898	0.036748	10.69	0.00898	TC192420_1234_40_S
9.66	-0.093	-0.13	0.90037	0.936912	0.02	0.90037	TC192421_2234_35_S
9.41	1.32	2.28	0.04732	0.113782	5.18	0.04732	TC192422_988_40_S
9.56	1716	2.95	0.01523	0.051442	8.71	0.01523	TC192423_1007_37_S
8.68	0.566	0.92	0.38221	0.520658	0.84	0.38221	TC192424_1549_40_S
7.9	-0.642	-1.09	0.30292	0.440775	1.19	0.30292	TC192425_1529_40_S
7.11	-0.999	-1.11	0.29297	0.430295	1.24	0.29297	TC192426_481_40_S
8.47	-1402	-2.32	0.04363	0.107152	5.4	0.04363	TC192427_722_34_S
8.91	0.961	1.17	0.27086	0.406871	1.37	0.27086	TC192428_963_39_S
10.41	-0.148	-0.26	0.80251	0.871699	0.07	0.80251	TC192429_1668_37_S
10.94	0.285	0.41	0.68911	0.786194	0.17	0.68911	TC192430_897_36_S
8.16	2129	3.65	0.00484	0.025134	13.31	0.00484	TC192431_1176_40_S
9.61	3402	4.75	0.00089	0.009215	22.6	0.00089	TC192432_2620_39_S
10.85	4306	6.75	6e-05	0.002248	45.6	6e-05	TC192433_676_34_X2
9.39	1849	3.2	0.01007	0.039543	10.25	0.01007	TC192434_1905_39_S
8.51	0.798	1.25	0.24073	0.372593	1.57	0.24073	TC192435_2628_40_S
8.39	1267	1.45	0.17841	0.29927	2.11	0.17841	TC192436_1952_40_S
9.49	5107	7.79	2e-05	0.001411	60.74	2e-05	TC192438_1650_40_S
9.36	0.805	1.37	0.20166	0.3274	1.88	0.20166	TC192439_1337_37_S
8.49	2035	3.05	0.01284	0.046105	9.33	0.01284	TC192440_2282_36_S
8.74	2024	3.05	0.01292	0.046291	9.3	0.01292	TC192441_2076_37_S
8.17	1905	2.66	0.02497	0.072396	7.06	0.02497	TC192442_629_37_X2
7.64	-0.378	-0.59	0.5659	0.686987	0.35	0.5659	TC192443_680_39_S
8.36	1833	2.36	0.04082	0.10225	5.59	0.04082	TC192444_2475_37_S
9.69	-0.224	-0.36	0.72472	0.814506	0.13	0.72472	TC192445_2530_38_S
8.85	-0.168	-0.28	0.78432	0.858354	0.08	0.78432	TC192446_1190_38_S
8.85	2	3.37	0.00767	0.033504	11.33	0.00767	TC192447_1425_40_S
8.57	-1449	-1.82	0.09962	0.195165	3.33	0.09962	TC192448_563_38_S
9.83	5502	9.23	0	0.000823	85.27	0	TC192449_743_37_X2
8.23	2851	4.16	0.00217	0.015456	17.28	0.00217	TC192450_1240_38_X2
7.81	-0.251	-0.36	0.7289	0.817721	0.13	0.7289	TC192451_1518_35_S
8.71	1972	3.35	0.00782	0.033866	11.25	0.00782	TC192452_2088_40_S
7.69	-1424	-2.06	0.06812	0.147559	4.23	0.06812	TC192453_1089_40_S
8.27	-0.685	-1.16	0.27591	0.411902	1.34	0.27591	TC192454_749_35_S
7.98	-0.272	-0.41	0.69334	0.789285	0.17	0.69334	TC192455_1100_40_S
8.31	0.644	1.09	0.30254	0.440368	1.19	0.30254	TC192456_989_35_S
10.54	2049	3.13	0.01127	0.042545	9.81	0.01127	TC192457_1732_37_S
7.69	1212	1.41	0.19114	0.31491	1.98	0.19114	TC192458_809_37_S
8.74	3116	4.14	0.00222	0.015633	17.17	0.00222	TC192459_1395_40_S
9.21	-0.98	-1.6	0.14178	0.252833	2.57	0.14178	TC192460_1865_40_S
9.54	1667	2.78	0.02021	0.062571	7.74	0.02021	TC192461_862_39_X2
8.36	-0.964	-1.62	0.13743	0.2471	2.63	0.13743	TC192462_1814_40_S
9.71	-1738	-2.93	0.01575	0.05263	8.6	0.01575	TC192463_1835_39_S
7.91	1212	1.95	0.08077	0.167582	3.81	0.08077	TC192464_2124_35_S
8.14	-0.259	-0.3	0.76897	0.84722	0.09	0.76897	TC192465_2101_40_S
8.28	3.22	5.58	0.00028	0.004918	31.1	0.00028	TC192466_884_37_S
9.54	-0.785	-1.13	0.28449	0.420728	1.29	0.28449	TC192467_273_41_S
7.7	0.738	1.19	0.26188	0.396956	1.42	0.26188	TC192468_962_38_X2
10.89	-0.606	-1.05	0.31885	0.457726	1.11	0.31885	TC192470_1411_39_S
7.45	1346	2.3	0.04513	0.109945	5.31	0.04513	TC192471_1787_40_S
8.69	1818	2.57	0.02888	0.080184	6.61	0.02888	TC192472_1124_37_X2
8.52	-0.414	-0.72	0.48828	0.619987	0.52	0.48828	TC192473_1421_38_S
7.14	-2689	-4.18	0.0021	0.015144	17.46	0.0021	TC192474_868_35_S
9.4	-0.811	-1.41	0.18944	0.312896	2	0.18944	TC192475_2429_40_S
9.31	0.982	1.35	0.20862	0.335897	1.82	0.20862	TC192476_123_35_S
9.29	3796	6.47	9e-05	0.002715	41.86	9e-05	TC192477_1447_40_S
8.41	1263	2.06	0.06751	0.146586	4.25	0.06751	TC192478_1809_35_S
9.61	3.28	4.82	0.0008	0.008686	23.26	0.0008	TC192479_876_35_S
9.21	0.428	0.74	0.47673	0.609656	0.55	0.47673	TC192480_1778_40_S
9.44	-1307	-1.91	0.08617	0.175728	3.66	0.08617	TC192481_1367_39_S
8.67	-0.901	-1.17	0.26986	0.405781	1.37	0.26986	TC192482_650_40_S
9.9	-1248	-1.58	0.14652	0.259004	2.5	0.14652	TC192483_861_35_S
8.73	-1472	-1.17	0.2715	0.407434	1.36	0.2715	TC192484_155_39_S
7.57	0.239	0.26	0.79701	0.868245	0.07	0.79701	TC192485_1080_38_S
9.77	-0.381	-0.62	0.55086	0.673832	0.38	0.55086	TC192486_1709_36_S
13.44	-2.2	-3.69	0.0045	0.024144	13.65	0.0045	TC192487_1569_35_S
8.6	1302	2.16	0.05749	0.130278	4.66	0.05749	TC192488_1019_40_S
8.69	0.526	0.81	0.43933	0.575253	0.65	0.43933	TC192489_496_36_S
7.9	0.421	0.7	0.50036	0.631148	0.49	0.50036	TC192490_555_40_S
9.31	3399	4.65	0.00103	0.010055	21.61	0.00103	TC192491_923_34_X2
8.52	0.722	1.24	0.24604	0.378638	1.53	0.24604	TC192492_1758_39_S
9.46	-2277	-3.77	0.00398	0.022289	14.22	0.00398	TC192493_1334_35_S
7.72	0.768	1.16	0.27326	0.409081	1.35	0.27326	TC192494_1256_40_S
9.89	3352	4.01	0.00344	0.020411	16.05	0.00344	TC192495_2238_39_S
9.6	3357	4.9	0.00072	0.008062	24.02	0.00072	TC192496_926_40_X2
9.12	1276	1.82	0.09954	0.195084	3.33	0.09954	TC192497_1749_36_S
8.17	1129	1.54	0.15541	0.270437	2.38	0.15541	TC192499_1102_40_S
7.76	0.292	0.47	0.64592	0.75234	0.23	0.64592	TC192500_1449_35_S
7.87	-0.281	-0.46	0.65755	0.761855	0.21	0.65755	TC192501_1167_41_S
7.43	-0.764	-1	0.33995	0.479031	1.01	0.33995	TC192502_1234_41_S
8.19	1191	1.81	0.1025	0.199279	3.26	0.1025	TC192503_1784_35_S
7.75	-0.444	-0.65	0.52933	0.655947	0.43	0.52933	TC192504_1439_39_S
8.27	-0.04	-0.07	0.94904	0.967763	0	0.94904	TC192505_2124_39_S
7.51	-0.144	-0.23	0.82383	0.885794	0.05	0.82383	TC192506_1132_35_S
11.97	-2665	-4.35	0.00161	0.013007	18.93	0.00161	TC192507_785_37_S
8.07	1946	3.08	0.01233	0.044979	9.48	0.01233	TC192508_1712_39_S
10.06	0.652	1.04	0.32205	0.461138	1.09	0.32205	TC192509_1794_40_S
9.05	-1.2	-2.01	0.07399	0.156785	4.03	0.07399	TC192510_1572_40_S
9.31	-0.666	-1.16	0.2744	0.410292	1.34	0.2744	TC192511_1294_38_S
6.77	-2816	-3.05	0.01467	0.050182	9.31	0.01467	TC192512_1113_35_S
7.87	1901	2.53	0.03092	0.084198	6.4	0.03092	TC192513_1196_39_S
9.84	-0.765	-1.22	0.25095	0.384266	1.49	0.25095	TC192514_2207_40_S
9.22	1258	1.66	0.13307	0.241349	2.76	0.13307	TC192515_2076_40_S
9.2	-2795	-4.78	0.00085	0.009004	22.85	0.00085	TC192516_588_34_S
9.57	-0.489	-0.83	0.42929	0.565862	0.68	0.42929	TC192517_1428_37_S
6.34	-3678	-3.92	0.0039	0.022006	15.37	0.0039	TC192518_1592_39_S
8	0.763	1.29	0.22841	0.35872	1.66	0.22841	TC192519_1138_38_S
10.06	-0.145	-0.23	0.82133	0.88424	0.05	0.82133	TC192520_1540_40_S
8.48	2743	4.57	0.00117	0.010842	20.85	0.00117	TC192521_2062_40_S
10.64	0.59	0.93	0.37471	0.513757	0.87	0.37471	TC192522_1025_34_X2
5.62	-5828	-6.39	0.00027	0.004893	40.82	0.00027	TC192523_11_41_S
8.41	1976	3.32	0.00821	0.034825	11.05	0.00821	TC192524_1320_37_S
9	-3381	-5.86	0.00019	0.004124	34.3	0.00019	TC192525_751_35_S
8.62	1491	2.22	0.05171	0.121291	4.94	0.05171	TC192526_306_35_S
8.43	1801	3.1	0.01193	0.044019	9.6	0.01193	TC192527_1379_39_S
10.4	1295	2.17	0.05682	0.129302	4.69	0.05682	TC192528_2229_40_S
8.02	1242	1.31	0.21967	0.348437	1.73	0.21967	TC192529_1160_36_S
9.35	3257	5.33	0.00039	0.005814	28.39	0.00039	TC192530_1261_37_S
11.07	3132	4.87	0.00075	0.008278	23.76	0.00075	TC192532_868_40_S
8.67	-2141	-3.46	0.00657	0.030497	11.98	0.00657	TC192533_16_37_S
7.66	-1185	-1.54	0.15586	0.270982	2.37	0.15586	TC192534_1011_36_X2
9.17	2962	5.11	0.00053	0.006821	26.12	0.00053	TC192535_676_40_S
8.76	0.438	0.68	0.51438	0.64301	0.46	0.51438	TC192536_2696_37_S
12.42	1554	2.61	0.02701	0.076623	6.81	0.02701	TC192537_1892_40_S
10.11	-1.56	-2.39	0.03892	0.098906	5.73	0.03892	TC192538_825_41_X7
9.77	4763	7.84	2e-05	0.001396	61.39	2e-05	TC192539_726_40_S
9.6	0.349	0.57	0.57874	0.697786	0.33	0.57874	TC192540_1404_38_S
9.4	0.404	0.54	0.60026	0.715168	0.29	0.60026	TC192541_1582_41_X2
8.28	0.207	0.33	0.74777	0.832084	0.11	0.74777	TC192542_933_37_X2
7.79	0.569	0.77	0.46026	0.594526	0.59	0.46026	TC192543_904_40_S
8.59	-0.085	-0.11	0.9126	0.944731	0.01	0.9126	TC192544_1152_40_S
7.9	1	1.64	0.13308	0.241364	2.7	0.13308	TC192545_1338_41_X2
7.53	-1587	-2.52	0.03159	0.085514	6.34	0.03159	TC192546_38_36_S
10.56	5385	8.51	1e-05	0.001071	72.48	1e-05	TC192547_1016_41_X2
9.53	0.25	0.42	0.68246	0.781406	0.18	0.68246	TC192548_2223_35_S
9.43	-3.79	-5.86	0.00019	0.004119	34.35	0.00019	TC192549_112_41_S
10.46	3.76	4.34	0.00164	0.013161	18.83	0.00164	TC192550_1150_40_S
7.49	-1503	-1.92	0.0852	0.174156	3.69	0.0852	TC192551_1307_40_S
7	1148	1.5	0.16654	0.284552	2.24	0.16654	TC192552_741_40_S
9.52	0.521	0.67	0.51918	0.646644	0.45	0.51918	TC192553_1345_40_S
9.84	-1026	-1.61	0.14062	0.251276	2.58	0.14062	TC192554_979_40_S
8.15	1.65	2.58	0.02832	0.079074	6.67	0.02832	TC192555_1274_40_S
8.45	1209	2.09	0.06463	0.142011	4.36	0.06463	TC192556_1281_40_S
8.75	1171	1.86	0.09468	0.188242	3.44	0.09468	TC192557_1798_35_S
8.05	1197	2.01	0.07299	0.155281	4.06	0.07299	TC192558_1552_40_S
9.59	1.66	2.79	0.02007	0.062324	7.77	0.02007	TC192559_840_39_S
7.17	-3654	-4.61	0.00146	0.012254	21.29	0.00146	TC192560_853_39_S
9.1	0.625	0.68	0.51067	0.639927	0.47	0.51067	TC192561_1228_36_S
9.27	0.357	0.54	0.59848	0.713567	0.3	0.59848	TC192562_1154_40_S
9.04	-1332	-2.16	0.05738	0.130081	4.67	0.05738	TC192563_294_34_X2
10.51	5313	8.56	1e-05	0.001046	73.2	1e-05	TC192564_877_41_X2
9.62	4118	7.13	4e-05	0.001872	50.77	4e-05	TC192565_1732_39_S
8.88	0.184	0.27	0.79294	0.86518	0.07	0.79294	TC192566_960_39_S
12.73	-2788	-4.62	0.00108	0.010341	21.34	0.00108	TC192567_48_41_S
11.21	3.33	4.93	0.00069	0.007903	24.29	0.00069	TC192568_873_39_X2
8.4	1733	2.26	0.05175	0.121329	5.11	0.05175	TC192569_2001_40_S
9.56	4889	7.27	4e-05	0.001763	52.82	4e-05	TC192570_1026_41_X4
9.45	4341	6.8	6e-05	0.002221	46.18	6e-05	TC192571_1550_39_S
8.59	1107	1.91	0.0864	0.175992	3.66	0.0864	TC192572_1768_40_S
7.51	-0.076	-0.13	0.903	0.938757	0.02	0.903	TC192573_1099_40_S
10.03	1239	2.11	0.06196	0.137668	4.47	0.06196	TC192574_1661_36_S
8.1	1056	1.59	0.14367	0.255347	2.54	0.14367	TC192575_2179_37_S
7.03	-0.028	-0.03	0.97349	0.98327	0	0.97349	TC192576_1330_36_S
9.17	0.591	0.75	0.47013	0.603668	0.57	0.47013	TC192577_1116_40_S
9.31	-0.149	-0.24	0.81299	0.878373	0.06	0.81299	TC192578_2540_35_S
9.24	0.446	0.77	0.46194	0.59613	0.59	0.46194	TC192579_1460_41_X2
8.15	0.197	0.31	0.76628	0.845068	0.09	0.76628	TC192580_922_40_S
8.37	-0.002	0	0.99711	0.998366	0	0.99711	TC192581_143_40_S
9.31	-1479	-2.53	0.03068	0.083702	6.42	0.03068	TC192582_887_37_S
8.46	-0.116	-0.15	0.8841	0.92623	0.02	0.8841	TC192583_231_41_S
9	-1075	-1.84	0.09637	0.190514	3.4	0.09637	TC192584_1912_39_S
9.51	-0.635	-1.1	0.29776	0.43552	1.21	0.29776	TC192585_1076_37_S
9.18	2447	3.59	0.00536	0.02676	12.86	0.00536	TC192586_1908_39_S
9.12	0.105	0.14	0.88827	0.928704	0.02	0.88827	TC192587_673_39_S
6.94	-1915	-2.23	0.05404	0.12478	4.99	0.05404	TC192588_995_36_S
11.21	0.949	1.39	0.19539	0.320085	1.94	0.19539	TC192589_1252_39_S
10.73	2264	3.74	0.00416	0.022866	14.02	0.00416	TC192590_1487_38_S
11.37	-2486	-4.27	0.00182	0.01393	18.26	0.00182	TC192591_1839_40_S
12.82	-3588	-6.21	0.00012	0.003171	38.6	0.00012	TC192592_1165_35_S
7.66	-0.014	-0.02	0.9807	0.987792	0	0.9807	TC192593_1260_38_S
9.72	-1084	-1.63	0.13603	0.245231	2.65	0.13603	TC192594_1384_35_S
7.76	2.64	3.06	0.01263	0.045682	9.39	0.01263	TC192595_1095_36_S
9.54	0.671	1.11	0.29384	0.431269	1.23	0.29384	TC192596_1031_40_S
10.87	1064	1.57	0.15014	0.263732	2.45	0.15014	TC192597_1882_36_S
6.35	-2422	-2.98	0.01454	0.049909	8.88	0.01454	TC192598_970_40_S
9.39	3327	5.54	0.00029	0.004991	30.73	0.00029	TC192599_789_39_S
6.9	3244	5.21	0.00046	0.006258	27.18	0.00046	TC192600_2360_40_S
8.84	-2587	-4.43	0.00143	0.012142	19.63	0.00143	TC192601_1255_35_S
6.94	3.1	2.78	0.02033	0.062822	7.73	0.02033	TC192602_1432_40_S
9.98	-1.64	-2.47	0.034	0.089885	6.12	0.034	TC192603_1951_35_S
7.77	2094	3.54	0.00578	0.028156	12.53	0.00578	TC192604_1108_39_S
7.58	-1.7	-2.47	0.03441	0.090628	6.08	0.03441	TC192605_663_41_S
9.4	2127	3.41	0.00717	0.032126	11.61	0.00717	TC192606_777_40_S
8.93	4315	6.77	6e-05	0.002235	45.86	6e-05	TC192607_2784_34_X2
10.29	0.329	0.5	0.63154	0.74035	0.25	0.63154	TC192608_283_40_S
9.14	2587	4.03	0.00265	0.01751	16.23	0.00265	TC192609_1714_40_S
8.9	-2757	-3.63	0.00497	0.025601	13.19	0.00497	TC192610_1012_40_X2
9.28	-1789	-3.02	0.01364	0.047808	9.11	0.01364	TC192611_781_35_S
7.55	0.56	0.92	0.38266	0.521102	0.84	0.38266	TC192612_1492_40_S
9.35	-0.51	-0.78	0.45211	0.587131	0.61	0.45211	TC192613_1187_40_S
8.36	5077	7.1	4e-05	0.001887	50.4	4e-05	TC192614_1112_35_S
7.26	0.282	0.49	0.63763	0.745939	0.24	0.63763	TC192615_1400_39_S
8.32	2871	4.31	0.00173	0.013551	18.55	0.00173	TC192616_2450_39_S
6.37	-0.12	-0.12	0.90375	0.939216	0.02	0.90375	TC192617_753_40_S
8.88	3403	5.27	0.00043	0.006013	27.75	0.00043	TC192618_1134_35_S
8.74	1741	1.66	0.13041	0.237733	2.74	0.13041	TC192619_131_41_X2
9.9	0.8	0.95	0.36515	0.504038	0.9	0.36515	TC192620_262_40_S
9.98	-0.407	-0.38	0.71194	0.804884	0.14	0.71194	TC192621_615_38_S
7.32	-1434	-2.19	0.05455	0.125695	4.8	0.05455	TC192622_1700_40_S
7.89	3935	4.43	0.00143	0.012114	19.65	0.00143	TC192623_1419_40_S
8.54	0.73	0.63	0.54567	0.669894	0.39	0.54567	TC192624_1623_40_S
7.24	-0.632	-1.04	0.32314	0.46217	1.09	0.32314	TC192625_967_35_S
7.53	0.361	0.5	0.63037	0.739479	0.25	0.63037	TC192626_855_35_S
8.28	5469	4.69	0.00097	0.009703	22.01	0.00097	TC192627_967_35_S
7.11	1319	2.22	0.05216	0.122009	4.92	0.05216	TC192628_1699_37_S
7.07	2.43	2.59	0.02773	0.077915	6.73	0.02773	TC192629_1924_40_S
9.2	0.294	0.41	0.69082	0.787344	0.17	0.69082	TC192630_546_40_S
6.54	0.566	0.67	0.51599	0.644352	0.46	0.51599	TC192631_787_39_S
7.6	0.731	1.03	0.32756	0.466794	1.06	0.32756	TC192632_1886_40_S
7.69	-2687	-3.62	0.0061	0.029102	13.1	0.0061	TC192633_496_36_S
7.61	1371	1.86	0.09446	0.18799	3.45	0.09446	TC192634_195_40_S
9.03	0.007	0.01	0.99081	0.994056	0	0.99081	TC192635_3128_40_S
9.37	-1.92	-2.72	0.0223	0.06699	7.42	0.0223	TC192636_104_37_S
9.18	0.156	0.21	0.8361	0.894032	0.05	0.8361	TC192637_2248_35_S
9.62	2.39	3.66	0.00475	0.024918	13.4	0.00475	TC192638_1522_38_S
10.57	1.77	2.6	0.02758	0.077648	6.75	0.02758	TC192639_837_34_X2
12.16	1873	2.96	0.01512	0.051176	8.74	0.01512	TC192640_751_40_S
8.41	-0.933	-1.48	0.17002	0.288689	2.2	0.17002	TC192641_414_40_S
10.53	2119	1.88	0.09087	0.182714	3.54	0.09087	TC192642_65_34_X2
10.08	6.93	10.28	0	0.000668	105.75	0	TC192643_830_41_X2
8.63	-1604	-2.31	0.04465	0.109116	5.34	0.04465	TC192644_733_40_S
11.09	-0.592	-0.92	0.37986	0.51847	0.85	0.37986	TC192645_373_40_S
9.97	-0.224	-0.35	0.73227	0.820522	0.12	0.73227	TC192646_1221_35_S
9.32	0.474	0.54	0.60309	0.71764	0.29	0.60309	TC192647_944_38_S
12.99	-2043	-3.02	0.0136	0.047756	9.12	0.0136	TC192648_980_37_S
8.37	0.197	0.29	0.77741	0.852726	0.08	0.77741	TC192649_96_37_S
9.41	1925	2.97	0.01479	0.050479	8.82	0.01479	TC192650_546_41_X2
7.84	2327	3.08	0.01239	0.045122	9.46	0.01239	TC192651_1432_38_S
7.93	-0.4	-0.66	0.5264	0.653545	0.43	0.5264	TC192652_1999_40_S
9.74	2016	3.03	0.01342	0.047373	9.17	0.01342	TC192653_850_39_S
7.82	0.527	0.88	0.40145	0.538871	0.77	0.40145	TC192654_1022_37_S
9.7	-1.85	-3.21	0.00986	0.039039	10.32	0.00986	TC192655_1413_38_S
9.54	-1963	-2.83	0.01854	0.058898	8.03	0.01854	TC192656_912_40_S
11.07	2854	4.55	0.00119	0.010956	20.73	0.00119	TC192657_735_41_X2
8.82	1628	2.33	0.04306	0.106162	5.44	0.04306	TC192658_634_40_S
6.78	-2332	-3.7	0.00446	0.023989	13.7	0.00446	TC192659_136_35_S
8.56	6009	8.93	1e-05	0.000908	79.7	1e-05	TC192660_1625_40_S
9.55	-1638	-2.66	0.02467	0.071728	7.1	0.02467	TC192661_3270_37_S
9.68	0.913	1.4	0.1941	0.318661	1.95	0.1941	TC192662_1626_40_S
7.02	-2458	-2.85	0.02018	0.062525	8.12	0.02018	TC192663_1133_38_S
6.79	1597	1.34	0.2107	0.338362	1.8	0.2107	TC192664_1089_40_S
8.34	1555	2.48	0.03369	0.089291	6.15	0.03369	TC192665_800_39_S
9.25	2.36	2.97	0.01466	0.05018	8.85	0.01466	TC192666_863_39_S
6.81	-5163	-6.93	9e-05	0.002711	48.07	9e-05	TC192667_1327_39_S
7.16	-0.095	-0.11	0.91402	0.945583	0.01	0.91402	TC192668_1561_35_S
7.43	0.01	0.02	0.98698	0.9916	0	0.98698	TC192669_148_41_S
7.66	-0.533	-0.86	0.41195	0.54911	0.74	0.41195	TC192670_1534_40_S
8.71	3318	5.43	0.00034	0.005411	29.5	0.00034	TC192671_1722_37_S
10.83	8207	13.21	0	0.000579	174.57	0	TC192672_624_34_X3
8.81	0.867	1.5	0.16497	0.282473	2.26	0.16497	TC192673_1819_38_S
11.39	-3659	-5.45	0.00033	0.005323	29.71	0.00033	TC192674_33_34_S
9.85	3257	5.67	0.00025	0.004672	32.09	0.00025	TC192675_763_41_X2
7.21	0.161	0.21	0.8351	0.893555	0.05	0.8351	TC192676_277_38_X2
8.73	0.46	0.64	0.53783	0.663589	0.41	0.53783	TC192677_24_39_X2
11.35	2205	3.77	0.00397	0.022235	14.23	0.00397	TC192678_884_41_X2
9.09	1846	2.32	0.04435	0.108529	5.36	0.04435	TC192679_1540_40_S
8.69	0.064	0.1	0.9201	0.949045	0.01	0.9201	TC192680_169_40_S
8.43	1.1	1.85	0.0959	0.189865	3.41	0.0959	TC192681_694_40_S
11.55	-1432	-2.49	0.03321	0.088448	6.19	0.03321	TC192682_760_38_S
7.27	-0.658	-1.06	0.31487	0.453639	1.13	0.31487	TC192683_917_40_S
11.92	-0.05	-0.07	0.94495	0.965018	0.01	0.94495	TC192684_169_41_S
8.02	1382	2.29	0.04652	0.112461	5.23	0.04652	TC192686_724_40_S
7.8	0.516	0.84	0.42327	0.560379	0.7	0.42327	TC192687_235_34_S
11.7	-1903	-3.04	0.01325	0.047036	9.21	0.01325	TC192688_1140_34_X2
7.1	-0.502	-0.75	0.47423	0.607524	0.56	0.47423	TC192689_888_35_S
9.55	0.903	1.06	0.3137	0.452469	1.13	0.3137	TC192690_1110_38_S
7.86	0.925	1.56	0.15174	0.265734	2.43	0.15174	TC192691_1339_40_S
8.26	1.39	2.15	0.05829	0.131555	4.63	0.05829	TC192692_2237_36_S
8.74	1.1	1.65	0.13054	0.237911	2.74	0.13054	TC192693_1839_35_S
8.06	2.3	3.56	0.0056	0.027561	12.67	0.0056	TC192694_1560_40_S
8.13	2889	3.65	0.00483	0.025118	13.33	0.00483	TC192695_711_36_X2
7.47	1301	1.89	0.09016	0.181676	3.56	0.09016	TC192696_994_40_S
10.7	8372	11.91	0	0.000579	141.94	0	TC192697_1410_39_X3
7.72	-0.464	-0.79	0.45087	0.586244	0.62	0.45087	TC192698_804_39_S
8.92	-0.178	-0.29	0.77989	0.855051	0.08	0.77989	TC192699_767_36_S
8.51	1.4	2	0.07467	0.157799	4	0.07467	TC192700_1298_39_S
8.8	-0.854	-1.15	0.27807	0.414085	1.32	0.27807	TC192701_2106_38_S
8.28	0.982	1.68	0.12491	0.230313	2.83	0.12491	TC192702_633_35_S
8.88	3259	4.69	0.00098	0.009717	21.98	0.00098	TC192703_1158_40_S
8.87	2547	3.95	0.00298	0.018781	15.63	0.00298	TC192704_1461_40_S
9.13	2877	4.71	0.00095	0.009584	22.14	0.00095	TC192705_1171_35_S
6.97	-2272	-2.65	0.02791	0.078269	7	0.02791	TC192706_1811_40_S
10.69	5829	9.9	0	0.00072	97.95	0	TC192707_620_39_S
9.62	0.557	0.6	0.55996	0.682075	0.36	0.55996	TC192708_151_34_S
8.45	-0.553	-0.91	0.38478	0.523185	0.83	0.38478	TC192709_1913_40_S
10.93	3274	4.5	0.00128	0.011427	20.29	0.00128	TC192710_632_37_X2
9.37	0.038	0.06	0.9527	0.969802	0	0.9527	TC192711_1124_39_S
10.01	-0.226	-0.38	0.70984	0.80311	0.15	0.70984	TC192712_724_41_X2
7.97	0.37	0.46	0.6557	0.760462	0.21	0.6557	TC192713_876_41_S
9.54	3.83	4.97	0.00065	0.007632	24.66	0.00065	TC192714_749_39_S
9.36	4532	7.03	5e-05	0.001945	49.38	5e-05	TC192715_1033_38_S
9.93	4158	5.34	0.00039	0.005766	28.53	0.00039	TC192716_726_40_S
8.32	2412	3.9	0.00326	0.019763	15.19	0.00326	TC192717_1233_40_S
8.91	2358	2.67	0.02458	0.071535	7.11	0.02458	TC192718_1857_36_S
9.3	2716	4.39	0.00152	0.012593	19.28	0.00152	TC192719_755_40_S
7.82	-0.338	-0.45	0.66583	0.768466	0.2	0.66583	TC192720_1236_41_X2
9.79	1748	2.64	0.02549	0.073418	7	0.02549	TC192721_889_40_S
8.96	-2296	-3.92	0.00313	0.019286	15.39	0.00313	TC192722_14_39_S
9.37	1118	1.79	0.10463	0.202187	3.22	0.10463	TC192723_1425_35_S
9.26	-0.018	-0.03	0.97613	0.98489	0	0.97613	TC192724_853_37_S
9.78	-0.681	-1.09	0.30138	0.439221	1.19	0.30138	TC192725_40_36_S
10.71	4231	6.98	5e-05	0.00199	48.73	5e-05	TC192726_1892_40_S
10.17	-0.046	-0.07	0.94349	0.964218	0.01	0.94349	TC192727_1694_40_S
7.95	0.586	0.9	0.39152	0.529074	0.81	0.39152	TC192728_1433_38_S
8.44	1148	1.6	0.14224	0.25348	2.56	0.14224	TC192729_873_39_S
9.22	2455	4.09	0.00242	0.016538	16.71	0.00242	TC192730_2159_40_S
7.91	-1114	-1.68	0.12529	0.230692	2.82	0.12529	TC192731_816_37_S
8.6	1356	2.05	0.06853	0.148235	4.22	0.06853	TC192732_691_39_S
12.11	-3462	-5.97	0.00017	0.003828	35.66	0.00017	TC192733_37_34_S
7.45	-0.046	-0.08	0.94073	0.9627	0.01	0.94073	TC192734_1261_37_S
8.69	-0.454	-0.61	0.55817	0.680411	0.37	0.55817	TC192735_269_41_X2
9	1884	3.27	0.00903	0.036878	10.67	0.00903	TC192736_1095_40_S
7.04	-0.133	-0.22	0.82765	0.888167	0.05	0.82765	TC192737_1606_36_S
7.07	0.267	0.39	0.70753	0.801243	0.15	0.70753	TC192738_111_34_X2
9.46	1963	2.79	0.0201	0.062388	7.76	0.0201	TC192739_1095_39_S
7.46	0.078	0.13	0.90018	0.936755	0.02	0.90018	TC192740_780_34_X2
8.49	1019	1.5	0.16725	0.285406	2.24	0.16725	TC192741_893_41_X2
11.17	-0.757	-1.3	0.22565	0.355734	1.68	0.22565	TC192742_948_38_S
7.49	-0.1	-0.11	0.91329	0.945278	0.01	0.91329	TC192743_1253_40_S
10.42	-3.05	-5.29	0.00041	0.00594	28.02	0.00041	TC192744_117_41_S
7.62	-1242	-1.7	0.12052	0.224174	2.91	0.12052	TC192745_231_40_S
8.94	-0.5	-0.77	0.4627	0.596882	0.59	0.4627	TC192746_855_35_S
8.35	-0.112	-0.18	0.85858	0.909474	0.03	0.85858	TC192747_739_39_S
9.24	2.87	4.23	0.00194	0.014473	17.91	0.00194	TC192748_2365_40_S
10.71	2598	3.67	0.00465	0.024598	13.5	0.00465	TC192749_731_40_S
8.22	-2.35	-3.9	0.00323	0.019654	15.23	0.00323	TC192750_154_34_S
10.47	1601	2.56	0.02916	0.080791	6.58	0.02916	TC192751_618_37_S
8.18	1.4	2.18	0.05539	0.127058	4.76	0.05539	TC192752_2242_40_S
7.63	-2974	-4.85	0.00077	0.008451	23.54	0.00077	TC192753_1946_37_S
8.2	1919	2.99	0.01417	0.049076	8.97	0.01417	TC192754_1496_40_S
9.82	2334	3.97	0.00291	0.01855	15.75	0.00291	TC192755_1396_40_S
8.48	-0.83	-1.28	0.2313	0.361944	1.63	0.2313	TC192756_836_35_S
8.27	2237	3.13	0.01135	0.042688	9.79	0.01135	TC192757_754_40_S
6.91	-1436	-1.43	0.18754	0.310654	2.05	0.18754	TC192758_1660_40_S
7.01	-1561	-2.15	0.05846	0.131812	4.62	0.05846	TC192759_763_37_S
11.2	2554	3.7	0.00444	0.023978	13.71	0.00444	TC192760_683_40_S
8.44	0.813	1.32	0.2175	0.346047	1.74	0.2175	TC192761_3557_40_S
7.03	0.045	0.06	0.95334	0.970208	0	0.95334	TC192762_855_35_S
6.89	0.817	1.07	0.31206	0.450669	1.15	0.31206	TC192763_241_40_S
8.63	-0.454	-0.6	0.56387	0.685048	0.36	0.56387	TC192764_2345_40_S
8.85	-2326	-3.8	0.00379	0.021592	14.46	0.00379	TC192765_764_35_S
9.05	3159	4.35	0.00162	0.013007	18.93	0.00162	TC192766_824_40_S
7.78	-1099	-1.19	0.26538	0.400828	1.42	0.26538	TC192768_1926_39_S
11.62	1349	2.22	0.05241	0.122358	4.91	0.05241	TC192769_2205_40_S
9.06	4456	7.25	4e-05	0.001772	52.51	4e-05	TC192770_520_41_X3
8.02	2.12	3.3	0.00858	0.035723	10.87	0.00858	TC192771_706_40_S
12.38	-0.357	-0.55	0.59682	0.712076	0.3	0.59682	TC192772_420_35_S
8.31	0.764	1.02	0.33191	0.470914	1.05	0.33191	TC192773_1276_35_S
8.01	-3714	-5.64	0.00026	0.004767	31.78	0.00026	TC192774_2_41_S
6.23	-3728	-3.12	0.01316	0.046804	9.73	0.01316	TC192775_376_40_S
8.58	-1048	-1.82	0.10014	0.195868	3.32	0.10014	TC192776_107_39_S
9.62	-2274	-3.91	0.00319	0.019523	15.29	0.00319	TC192777_129_41_S
9.74	2363	3.68	0.00457	0.024374	13.58	0.00457	TC192778_774_40_S
9.49	4478	5.59	0.00027	0.004893	31.27	0.00027	TC192779_586_41_X2
10.8	3205	5.21	0.00047	0.006297	27.09	0.00047	TC192780_973_40_S
10.62	6257	10.09	0	0.000688	101.77	0	TC192781_772_39_X2
7.35	0.28	0.46	0.65312	0.758507	0.22	0.65312	TC192782_897_40_S
8.04	2264	3.06	0.01264	0.045684	9.39	0.01264	TC192783_1293_38_S
8.11	-0.01	-0.02	0.98827	0.992322	0	0.98827	TC192784_711_38_S
11.29	4533	6.74	6e-05	0.002253	45.37	6e-05	TC192785_778_40_S
8.51	-1714	-2.61	0.02712	0.076837	6.8	0.02712	TC192786_866_40_S
10.49	4556	4.93	0.00069	0.007901	24.29	0.00069	TC192787_794_40_S
10.85	4696	7.55	3e-05	0.00153	57.02	3e-05	TC192788_549_38_S
7.62	0.802	1.36	0.20556	0.332204	1.85	0.20556	TC192789_827_41_X2
9.25	0.889	1.2	0.26314	0.398323	1.44	0.26314	TC192790_803_37_X2
10.31	0.573	0.98	0.35014	0.489602	0.97	0.35014	TC192791_810_38_S
11.02	-1171	-2	0.07439	0.157404	4.01	0.07439	TC192792_933_36_S
10.98	-5731	-9.57	0	0.000738	91.6	0	TC192793_1027_40_S
13.18	-0.84	-1.36	0.20609	0.332792	1.84	0.20609	TC192794_13_41_S
9.16	1445	2.11	0.06226	0.138115	4.46	0.06226	TC192795_1162_36_S
9.75	2579	4.23	0.00194	0.014498	17.89	0.00194	TC192796_739_36_S
8.42	2286	3.75	0.00412	0.022692	14.07	0.00412	TC192797_788_38_X2
9.37	1715	2.34	0.04283	0.105755	5.46	0.04283	TC192798_1999_39_S
9.03	2965	4.66	0.00102	0.009937	21.73	0.00102	TC192799_956_38_S
9.05	-0.725	-1.21	0.25706	0.391358	1.45	0.25706	TC192800_1006_37_S
8.59	1906	3.24	0.00947	0.038094	10.48	0.00947	TC192802_1110_40_S
9.05	1078	1.82	0.1	0.195696	3.32	0.1	TC192803_1769_40_S
10.59	4489	7.14	4e-05	0.001863	51.03	4e-05	TC192804_758_35_S
10.27	3749	5.77	0.00022	0.004338	33.35	0.00022	TC192805_765_40_S
11.09	-3188	-5.32	0.0004	0.005846	28.32	0.0004	TC192806_2_39_S
8.28	1008	1.68	0.12522	0.230648	2.83	0.12522	TC192807_1048_38_S
8.61	1636	2.84	0.01824	0.058205	8.09	0.01824	TC192808_726_36_S
8.77	1277	1.52	0.16084	0.277409	2.31	0.16084	TC192809_287_40_X2
8.79	-0.501	-0.73	0.48262	0.615103	0.53	0.48262	TC192810_1857_35_S
6.73	-3068	-3.42	0.00826	0.034933	11.7	0.00826	TC192811_1477_40_S
8.28	1494	2.43	0.03674	0.094874	5.89	0.03674	TC192812_607_35_S
10.64	2385	2.56	0.02939	0.081202	6.55	0.02939	TC192813_548_34_X2
8.3	0.988	1.6	0.14246	0.253746	2.56	0.14246	TC192814_1813_37_S
9.51	0.87	1.45	0.17843	0.29927	2.11	0.17843	TC192815_729_36_S
10.01	4268	6.72	7e-05	0.002267	45.16	7e-05	TC192816_1407_35_S
7.57	-1193	-1.85	0.09493	0.188554	3.44	0.09493	TC192817_1255_39_S
9.82	4609	5.92	0.00018	0.003968	35.09	0.00018	TC192818_824_34_X2
9.48	1316	2.17	0.05665	0.128995	4.7	0.05665	TC192819_1189_37_S
9.06	3494	5.71	0.00024	0.004519	32.57	0.00024	TC192820_905_39_S
7.74	-0.552	-0.94	0.3722	0.511226	0.88	0.3722	TC192821_812_38_S
10.95	-0.901	-1.49	0.1678	0.286044	2.23	0.1678	TC192822_2018_35_S
8.28	2.47	4.11	0.00234	0.016215	16.88	0.00234	TC192823_1742_40_S
9.88	0.736	0.88	0.40271	0.540146	0.77	0.40271	TC192824_802_36_S
8.89	3093	5.27	0.00042	0.005993	27.8	0.00042	TC192825_672_40_S
7.51	0.121	0.18	0.86129	0.911395	0.03	0.86129	TC192826_2382_39_S
7.64	-1155	-1.73	0.11652	0.218528	2.98	0.11652	TC192828_1115_38_S
8.46	2934	2.95	0.01524	0.051443	8.71	0.01524	TC192829_1352_39_S
9.18	2214	2.3	0.04511	0.109932	5.31	0.04511	TC192831_87_34_X2
7.67	-1712	-2.85	0.0181	0.057874	8.12	0.0181	TC192832_838_34_X2
9.14	1853	2.51	0.03197	0.086207	6.3	0.03197	TC192833_319_39_S
10.39	2662	3.4	0.00721	0.032238	11.59	0.00721	TC192834_768_35_S
6.4	-0.97	-0.94	0.37099	0.509965	0.88	0.37099	TC192835_576_40_S
10	-0.722	-1.25	0.24092	0.372794	1.56	0.24092	TC192836_1227_35_S
7.92	1879	3.12	0.0115	0.043047	9.74	0.0115	TC192837_1188_40_S
9.01	-1.94	-2.86	0.01764	0.05682	8.2	0.01764	TC192839_830_40_S
9.64	-1146	-1.83	0.09922	0.194602	3.34	0.09922	TC192840_896_35_S
9.32	4496	6.16	0.00013	0.003288	37.99	0.00013	TC192841_918_39_S
7.8	-2365	-2.59	0.03364	0.089212	6.72	0.03364	TC192842_1746_40_S
8.46	-1236	-1.64	0.13386	0.242409	2.68	0.13386	TC192843_850_37_S
8.79	-0.658	-0.98	0.35186	0.491073	0.96	0.35186	TC192844_1391_40_S
9.53	-1252	-2.12	0.06177	0.137309	4.48	0.06177	TC192845_25_41_S
8.5	-1.09	-1.89	0.08905	0.180155	3.58	0.08905	TC192846_780_37_S
12.9	-1.34	-1.92	0.08473	0.173431	3.7	0.08473	TC192847_638_39_S
9.7	3.84	6.41	0.0001	0.002761	41.11	0.0001	TC192848_1762_40_S
11.85	-2388	-4.07	0.00247	0.016752	16.6	0.00247	TC192849_493_40_S
8.3	2453	3.92	0.00312	0.019266	15.4	0.00312	TC192850_862_40_S
9.86	0.642	1.09	0.30258	0.440368	1.19	0.30258	TC192851_1065_37_S
8.18	0.901	1.51	0.16269	0.279759	2.29	0.16269	TC192852_1215_40_S
11.02	0.477	0.83	0.42742	0.564192	0.69	0.42742	TC192853_1683_40_S
8.04	-0.204	-0.33	0.75107	0.83477	0.11	0.75107	TC192854_1468_39_S
8.15	2497	4.09	0.00243	0.016572	16.69	0.00243	TC192855_2458_38_S
8.28	0.804	0.96	0.36218	0.501239	0.92	0.36218	TC192856_20_41_X2
10.72	-1175	-2.03	0.0713	0.152713	4.12	0.0713	TC192857_299_35_S
9.18	2012	3.27	0.00904	0.036912	10.67	0.00904	TC192858_1389_40_S
9.85	3.81	5.58	0.00028	0.004912	31.17	0.00028	TC192859_684_40_S
8.27	1152	1.76	0.11037	0.210185	3.1	0.11037	TC192860_1143_39_S
8.89	3579	4.96	0.00066	0.007668	24.6	0.00066	TC192861_1225_39_S
7.83	0.862	1.5	0.16533	0.282985	2.26	0.16533	TC192862_1726_40_S
9.73	0.468	0.8	0.44435	0.58007	0.64	0.44435	TC192863_1436_39_S
8.27	-0.787	-1.34	0.21226	0.340017	1.79	0.21226	TC192864_934_40_S
8.14	1107	1.72	0.1181	0.220791	2.95	0.1181	TC192865_1986_40_S
9.51	0.177	0.23	0.82117	0.884178	0.05	0.82117	TC192866_1574_38_S
7.35	-2022	-3.16	0.01069	0.04125	10.01	0.01069	TC192867_844_35_S
7.45	1764	2.32	0.04412	0.108129	5.37	0.04412	TC192868_855_40_S
10.22	2635	3.71	0.0044	0.023821	13.75	0.0044	TC192869_732_40_S
8.32	-1553	-2.68	0.02415	0.07061	7.17	0.02415	TC192870_4360_40_S
9.73	-0.225	-0.36	0.72682	0.816096	0.13	0.72682	TC192871_841_35_S
12.41	0.216	0.36	0.72551	0.814955	0.13	0.72551	TC192872_1804_40_S
10.86	5476	9.21	0	0.000823	84.77	0	TC192873_895_34_X2
7.46	-0.603	-0.78	0.45232	0.58727	0.61	0.45232	TC192874_1066_40_S
7.11	-2611	-3.6	0.00525	0.026451	12.95	0.00525	TC192876_43_35_S
10.02	4547	6.24	0.00012	0.003111	38.99	0.00012	TC192877_1007_36_X2
10.56	5286	9.05	1e-05	0.000876	81.93	1e-05	TC192878_562_41_X2
8.32	1067	1.46	0.1756	0.295664	2.14	0.1756	TC192879_1376_40_S
8.03	1882	3.01	0.01381	0.048177	9.06	0.01381	TC192880_1311_39_S
10.1	4462	6.01	0.00025	0.004677	36.06	0.00025	TC192881_821_41_X2
10.61	-1967	-3.4	0.00729	0.032422	11.54	0.00729	TC192882_945_36_S
8.3	-2727	-3.97	0.00292	0.018552	15.74	0.00292	TC192883_2199_38_S
9.3	0.085	0.15	0.88565	0.927098	0.02	0.88565	TC192884_1021_39_S
8.7	0.307	0.53	0.60533	0.71961	0.29	0.60533	TC192885_874_36_S
6.61	-2936	-3.68	0.0046	0.024471	13.55	0.0046	TC192886_971_40_S
7.84	-1674	-2.7	0.02305	0.068586	7.32	0.02305	TC192887_2513_39_S
9.44	-1099	-1.84	0.09694	0.191219	3.39	0.09694	TC192888_1870_37_S
9.17	1231	1.81	0.10182	0.198358	3.28	0.10182	TC192889_2091_35_S
8.28	0.667	0.98	0.34915	0.488554	0.97	0.34915	TC192890_1380_40_S
7.32	0.001	0	0.99901	0.999427	0	0.99901	TC192891_1175_35_S
9.43	2306	3.96	0.00297	0.018705	15.65	0.00297	TC192892_1242_37_S
8.23	0.604	1.01	0.33708	0.475937	1.02	0.33708	TC192894_24_36_S
7.77	-0.69	-1.18	0.26591	0.401409	1.4	0.26591	TC192895_804_35_S
8.54	0.373	0.65	0.53368	0.660154	0.42	0.53368	TC192896_986_35_S
7.89	1234	2.01	0.07381	0.156519	4.03	0.07381	TC192897_793_35_S
8.59	-0.06	-0.1	0.92476	0.951863	0.01	0.92476	TC192898_1193_39_S
7.9	-0.609	-0.78	0.45685	0.59139	0.6	0.45685	TC192899_455_41_X2
9.98	-1.9	-2.38	0.03947	0.099886	5.69	0.03947	TC192900_972_34_X3
8.56	1243	1.78	0.10687	0.205374	3.17	0.10687	TC192901_1659_38_S
7.38	-0.003	0	0.99633	0.997975	0	0.99633	TC192902_916_41_X2
10.22	2428	3.36	0.0078	0.033788	11.26	0.0078	TC192903_1899_39_S
7.98	1279	2.23	0.05127	0.120615	4.96	0.05127	TC192904_892_40_S
9.14	3104	5.22	0.00045	0.006216	27.28	0.00045	TC192905_933_40_S
10.74	1.44	1.86	0.09448	0.188004	3.45	0.09448	TC192906_1390_36_S
9.83	-0.62	-0.69	0.50487	0.634925	0.48	0.50487	TC192907_606_40_S
7.54	0.324	0.32	0.75401	0.836383	0.1	0.75401	TC192908_1109_38_S
10.16	0.094	0.13	0.89902	0.935993	0.02	0.89902	TC192909_1125_35_S
8.88	1301	2.25	0.04965	0.117895	5.05	0.04965	TC192910_1801_40_S
9.3	2965	4.91	0.0007	0.007976	24.15	0.0007	TC192911_573_41_X2
11.06	3974	6.46	9e-05	0.002718	41.78	9e-05	TC192912_2187_37_S
12.18	-1682	-2.89	0.01688	0.055166	8.36	0.01688	TC192913_999_36_S
8.14	1032	1.29	0.22732	0.357516	1.67	0.22732	TC192914_1642_38_S
8.74	2393	3.47	0.00649	0.030283	12.03	0.00649	TC192915_879_35_S
9	-0.065	-0.08	0.94004	0.962116	0.01	0.94004	TC192916_145_41_S
8.32	3023	4.61	0.00109	0.010381	21.29	0.00109	TC192917_1624_37_S
10.61	0.064	0.11	0.91561	0.946453	0.01	0.91561	TC192918_1672_37_S
8.43	-0.075	-0.12	0.90745	0.941277	0.01	0.90745	TC192919_1722_39_S
10.14	5807	7.64	4e-05	0.001901	58.43	4e-05	TC192920_989_40_S
8.7	0.484	0.63	0.54661	0.670636	0.39	0.54661	TC192921_445_41_S
8.93	-0.143	-0.22	0.82953	0.889473	0.05	0.82953	TC192922_1827_40_S
6.84	-3.03	-4.54	0.00122	0.011091	20.59	0.00122	TC192923_868_35_S
8.09	1764	2.77	0.02072	0.063598	7.66	0.02072	TC192924_1493_38_S
10.56	1844	2.85	0.01794	0.057474	8.15	0.01794	TC192925_709_37_X3
8.3	2474	3.37	0.00767	0.033504	11.33	0.00767	TC192926_981_34_X2
7.78	0.294	0.42	0.68421	0.782448	0.18	0.68421	TC192927_1205_38_S
9.89	3383	5.64	0.00026	0.004743	31.84	0.00026	TC192928_793_40_S
6.52	-3034	-3.5	0.00729	0.032422	12.26	0.00729	TC192929_853_40_S
8.25	0.942	1.6	0.1427	0.25411	2.55	0.1427	TC192930_2080_40_S
11.2	4894	6.33	0.00011	0.002934	40.01	0.00011	TC192931_1546_40_S
10.95	-2232	-3.01	0.01372	0.047977	9.09	0.01372	TC192932_24_33_S
7.92	-0.62	-1.03	0.32762	0.466841	1.06	0.32762	TC192933_18_41_S
10.24	0.769	1.33	0.21589	0.344138	1.76	0.21589	TC192934_724_35_S
7.91	1516	2.52	0.03121	0.084795	6.37	0.03121	TC192935_2154_35_S
8.83	0.194	0.27	0.79234	0.86468	0.07	0.79234	TC192936_817_35_S
8.65	3578	5.76	0.00022	0.004401	33.14	0.00022	TC192937_1311_40_S
11.07	4.98	8.3	1e-05	0.001173	68.82	1e-05	TC192938_958_34_X2
8.82	4365	6.94	5e-05	0.002026	48.14	5e-05	TC192939_680_39_X2
10.6	5819	9.71	0	0.000737	94.38	0	TC192940_654_40_S
8.29	2978	4.81	0.00082	0.00882	23.11	0.00082	TC192941_1250_39_S
11.93	1.55	2.7	0.02313	0.068709	7.3	0.02313	TC192942_1442_40_S
9.17	4719	4.3	0.00176	0.013683	18.46	0.00176	TC192943_6_41_X2
8.46	2186	3.57	0.00547	0.027108	12.77	0.00547	TC192944_628_38_X2
11.44	2942	4.19	0.00208	0.01504	17.53	0.00208	TC192945_1165_39_S
7.72	0.776	1.08	0.30525	0.443442	1.17	0.30525	TC192946_1115_40_S
7.95	-0.177	-0.28	0.78311	0.857428	0.08	0.78311	TC192948_1038_38_S
8.92	2488	4.2	0.00203	0.014829	17.66	0.00203	TC192949_863_38_S
7.95	0.965	1.63	0.13658	0.245988	2.64	0.13658	TC192950_138_39_S
10.32	4071	5.88	0.00019	0.004108	34.52	0.00019	TC192951_650_38_S
12.95	-2392	-4.05	0.00256	0.017123	16.42	0.00256	TC192952_795_38_S
10.74	5104	5.57	0.00028	0.004935	31.03	0.00028	TC192953_1502_35_S
8.85	2194	3.67	0.00467	0.024646	13.48	0.00467	TC192954_1646_35_S
7.55	1048	1.77	0.10935	0.208851	3.12	0.10935	TC192955_969_40_S
8.85	1891	2.66	0.02486	0.072136	7.07	0.02486	TC192956_1638_40_S
10.08	4086	6.6	8e-05	0.002442	43.56	8e-05	TC192957_680_39_X2
6.59	-1435	-1.45	0.17868	0.299423	2.11	0.17868	TC192958_774_35_S
8.29	0.597	0.79	0.44898	0.584507	0.63	0.44898	TC192959_1108_40_S
9.54	3977	5.25	0.00044	0.006069	27.6	0.00044	TC192960_1891_40_S
14.02	0.613	0.98	0.3535	0.492747	0.95	0.3535	TC192961_518_35_S
8.17	0.415	0.64	0.53437	0.660669	0.42	0.53437	TC192962_686_36_S
8.85	1081	1.79	0.10602	0.204178	3.19	0.10602	TC192963_606_40_S
9.06	4278	7.11	4e-05	0.001876	50.62	4e-05	TC192964_1149_35_S
9.52	2.55	4.41	0.00149	0.012375	19.42	0.00149	TC192965_1217_37_S
9.81	3565	6.16	0.00013	0.003297	37.93	0.00013	TC192966_886_38_S
8.7	-0.858	-1.14	0.28088	0.416861	1.31	0.28088	TC192967_1123_40_S
7.73	-0.159	-0.26	0.80254	0.871699	0.07	0.80254	TC192968_782_40_S
8.9	1459	2.51	0.03204	0.086368	6.29	0.03204	TC192969_1643_40_S
10.68	-0.189	-0.27	0.79018	0.863179	0.07	0.79018	TC192970_529_36_S
7.89	-0.144	-0.22	0.8276	0.888167	0.05	0.8276	TC192971_392_38_S
9.27	1.68	2.29	0.04628	0.112072	5.24	0.04628	TC192972_1519_40_S
7.97	2228	2.86	0.0197	0.06151	8.2	0.0197	TC192973_1542_39_S
12.11	-0.628	-1.06	0.3139	0.452591	1.13	0.3139	TC192974_2171_40_S
8.43	-1157	-1.95	0.08181	0.169298	3.78	0.08181	TC192975_1828_35_S
9.78	0.723	1.16	0.27274	0.40849	1.35	0.27274	TC192976_776_36_S
9.46	2283	3.44	0.00679	0.031135	11.84	0.00679	TC192977_1742_40_S
11.82	0.02	0.02	0.98216	0.988527	0	0.98216	TC192978_196_34_X5
9.29	2476	3.3	0.00858	0.035705	10.88	0.00858	TC192979_624_36_X2
7.39	1213	1.71	0.12003	0.22345	2.92	0.12003	TC192980_1532_39_S
8.88	-0.968	-1.58	0.14648	0.258962	2.5	0.14648	TC192981_854_35_S
8	0.898	1.56	0.15237	0.266651	2.42	0.15237	TC192982_1340_39_S
8.57	-0.231	-0.31	0.76294	0.842518	0.1	0.76294	TC192984_2281_40_S
7.91	3425	4.68	0.00099	0.009801	21.86	0.00099	TC192985_573_41_S
9.86	5272	7.14	4e-05	0.001863	50.93	4e-05	TC192986_995_39_S
9.02	0.015	0.02	0.98079	0.987802	0	0.98079	TC192989_411_41_S
8.18	0.894	1.44	0.18162	0.303021	2.08	0.18162	TC192990_1102_40_S
9.79	-1154	-1.89	0.08986	0.181323	3.56	0.08986	TC192991_367_34_S
9.25	2427	3.7	0.00444	0.023971	13.71	0.00444	TC192992_2134_39_S
7.32	0.173	0.22	0.82803	0.888378	0.05	0.82803	TC192993_1758_36_S
6.98	1062	1.59	0.14343	0.25511	2.54	0.14343	TC192994_1618_39_S
8.32	1324	2.19	0.05462	0.125803	4.8	0.05462	TC192995_683_40_S
10.71	1223	2.08	0.0652	0.142936	4.34	0.0652	TC192996_1256_40_S
8.59	-1394	-2.31	0.04464	0.109081	5.34	0.04464	TC192997_1074_35_S
8.56	2777	4.67	0.001	0.009816	21.85	0.001	TC192998_1083_40_S
9.37	0.084	0.12	0.90464	0.939621	0.02	0.90464	TC192999_1356_37_X2
11.06	2015	3.15	0.01092	0.04174	9.93	0.01092	TC193000_771_41_X2
9.73	-0.062	-0.1	0.92487	0.951863	0.01	0.92487	TC193001_1173_40_S
8.62	1.83	2.61	0.02719	0.076933	6.79	0.02719	TC193002_2745_40_S
9.78	2278	3.58	0.00543	0.027001	12.8	0.00543	TC193003_2857_39_S
7.97	-1023	-1.73	0.11569	0.217387	3	0.11569	TC193004_1120_40_S
11.9	3065	5.05	0.00058	0.007087	25.55	0.00058	TC193005_610_39_S
8.03	1455	1.99	0.07544	0.158999	3.98	0.07544	TC193006_791_40_S
10.22	-0.238	-0.39	0.7078	0.801434	0.15	0.7078	TC193007_744_38_X3
10.4	-0.135	-0.23	0.81955	0.882994	0.05	0.81955	TC193009_743_37_S
10	4743	5.58	0.00028	0.004918	31.13	0.00028	TC193010_1302_35_S
8.42	1014	1.57	0.14875	0.261888	2.47	0.14875	TC193011_1388_40_S
8.27	2035	3.35	0.00787	0.033975	11.22	0.00787	TC193012_1273_37_S
8.34	0.266	0.46	0.65796	0.762062	0.21	0.65796	TC193013_1212_35_S
8.69	3117	4.7	0.00096	0.00964	22.07	0.00096	TC193014_732_35_S
8.74	2351	2.5	0.0326	0.08739	6.24	0.0326	TC193015_695_39_S
7.67	1484	2.5	0.03238	0.08691	6.26	0.03238	TC193016_899_35_S
9.8	4086	6.73	7e-05	0.002265	45.23	7e-05	TC193017_758_37_X2
9.6	1625	2.7	0.02323	0.068886	7.29	0.02323	TC193018_672_40_S
9.41	-1397	-2.41	0.03792	0.097123	5.8	0.03792	TC193019_63_34_S
9.79	-2442	-4.1	0.00238	0.01635	16.81	0.00238	TC193020_625_38_S
7.66	-2245	-3.18	0.0104	0.040426	10.12	0.0104	TC193021_1346_34_S
8.65	2225	3.79	0.00385	0.021807	14.38	0.00385	TC193022_913_34_X2
7.84	0.983	1.25	0.23972	0.371473	1.57	0.23972	TC193023_1974_38_S
7.43	0.309	0.52	0.61185	0.724986	0.28	0.61185	TC193024_784_35_S
7.8	-3685	-5.31	0.0004	0.005874	28.25	0.0004	TC193026_845_39_S
9.71	5304	7.84	2e-05	0.001395	61.47	2e-05	TC193027_1358_37_S
10.37	-2.56	-4.44	0.00141	0.012015	19.74	0.00141	TC193028_9_39_X2
11.16	1945	2.98	0.01451	0.049837	8.89	0.01451	TC193029_1179_40_S
7.77	0.443	0.67	0.51847	0.646245	0.45	0.51847	TC193030_1670_40_S
9.39	1212	2.02	0.07269	0.154858	4.07	0.07269	TC193031_1064_40_S
9.52	3791	5.34	0.00038	0.005756	28.55	0.00038	TC193032_823_40_S
8.76	-0.35	-0.6	0.561	0.682754	0.36	0.561	TC193033_1179_40_S
8.96	1311	2.06	0.06752	0.146586	4.25	0.06752	TC193034_2124_35_S
10.46	0.204	0.33	0.74785	0.832094	0.11	0.74785	TC193035_1355_35_S
10.59	7514	8.71	1e-05	0.000985	75.92	1e-05	TC193036_639_41_X2
9.07	1151	1.23	0.24824	0.381275	1.51	0.24824	TC193037_637_40_S
8.97	1.88	2.33	0.04633	0.112144	5.42	0.04633	TC193038_1933_40_S
10.1	4471	6.66	7e-05	0.002344	44.42	7e-05	TC193039_837_40_S
10.98	1904	2.82	0.0191	0.06021	7.93	0.0191	TC193040_659_40_S
6.57	-4018	-4.8	0.00114	0.010657	23.03	0.00114	TC193041_1525_39_S
10.55	4592	7.45	3e-05	0.00162	55.49	3e-05	TC193042_1074_40_S
10.93	1397	2.14	0.05976	0.134079	4.56	0.05976	TC193043_1887_35_S
10.13	4681	6.85	6e-05	0.002151	46.89	6e-05	TC193044_713_40_S
10.53	6087	9.13	1e-05	0.00084	83.45	1e-05	TC193045_1869_36_S
8.59	-0.447	-0.76	0.46327	0.597454	0.58	0.46327	TC193046_1183_40_S
8.53	3.29	5.22	0.00046	0.006216	27.27	0.00046	TC193047_910_40_X2
10.38	-0.655	-1.02	0.33466	0.473669	1.03	0.33466	TC193048_763_35_S
12.76	0.36	0.62	0.5505	0.673604	0.38	0.5505	TC193049_836_37_S
7.65	-0.154	-0.26	0.79906	0.869431	0.07	0.79906	TC193050_423_41_S
9.58	-0.511	-0.85	0.41413	0.551094	0.73	0.41413	TC193051_2189_35_S
9.06	3088	5.34	0.00039	0.005763	28.54	0.00039	TC193052_2817_40_S
8.38	2249	3.23	0.00956	0.038354	10.45	0.00956	TC193053_829_37_S
10.42	8544	14.05	0	0.000579	197.33	0	TC193054_1040_40_S
10.19	3077	3.78	0.0039	0.022006	14.32	0.0039	TC193055_800_41_X2
8.13	0.19	0.31	0.76482	0.843807	0.09	0.76482	TC193056_1291_40_S
9.12	1405	1.76	0.11075	0.210641	3.09	0.11075	TC193057_1399_37_S
10.92	5003	7.82	2e-05	0.001405	61.12	2e-05	TC193058_768_40_S
8.08	1984	3.01	0.01375	0.048017	9.08	0.01375	TC193059_1585_40_S
9.36	-0.602	-1.02	0.33071	0.469843	1.05	0.33071	TC193060_76_40_S
8.14	2544	3.43	0.00691	0.031477	11.76	0.00691	TC193061_812_39_S
11.13	3197	3.84	0.00358	0.020925	14.73	0.00358	TC193062_937_40_S
8.63	0.754	1.2	0.25926	0.394117	1.44	0.25926	TC193063_1498_35_S
8.45	0.898	1.45	0.1782	0.299018	2.11	0.1782	TC193064_1560_36_S
8.44	2.84	3.3	0.00848	0.035502	10.92	0.00848	TC193066_1990_40_S
10.61	-2892	-4.33	0.00167	0.013312	18.73	0.00167	TC193067_1097_35_S
9.41	-0.975	-1.69	0.12423	0.229396	2.84	0.12423	TC193068_29_41_S
8.29	-0.112	-0.18	0.86194	0.911845	0.03	0.86194	TC193069_745_38_S
9.56	0.159	0.2	0.84302	0.89929	0.04	0.84302	TC193070_621_40_S
10.25	0.988	1.57	0.14941	0.262778	2.46	0.14941	TC193071_734_36_X2
8.04	1068	1.38	0.20192	0.327592	1.91	0.20192	TC193072_1973_36_S
12.28	-1726	-2.67	0.02435	0.070992	7.14	0.02435	TC193073_732_40_S
7.13	-1849	-2.81	0.01929	0.060612	7.9	0.01929	TC193074_180_39_S
8.68	-0.091	-0.13	0.90111	0.937355	0.02	0.90111	TC193075_557_40_S
6.86	-0.307	-0.39	0.70677	0.800611	0.15	0.70677	TC193076_1142_40_S
9.22	1467	1.9	0.08787	0.178303	3.62	0.08787	TC193077_935_41_X2
11.4	3402	5.86	0.00019	0.004119	34.35	0.00019	TC193078_1459_40_S
7.13	-2465	-2.96	0.01496	0.050846	8.78	0.01496	TC193079_672_35_S
9.47	0.052	0.07	0.94484	0.965004	0.01	0.94484	TC193080_1222_35_S
7.97	1154	1.92	0.08578	0.175029	3.67	0.08578	TC193081_1104_38_S
8.16	-1145	-1.72	0.11849	0.221398	2.94	0.11849	TC193082_996_35_S
8.93	2054	3.46	0.00663	0.030647	11.94	0.00663	TC193083_698_35_S
8.87	4542	5.6	0.00027	0.004859	31.4	0.00027	TC193084_1066_40_S
8.08	2.84	3.81	0.00377	0.021545	14.48	0.00377	TC193085_2084_40_S
7.81	0.18	0.25	0.80598	0.87374	0.06	0.80598	TC193086_822_38_S
9.05	-1208	-1.77	0.10869	0.207947	3.13	0.10869	TC193088_1136_40_S
7.37	0.112	0.17	0.8691	0.916136	0.03	0.8691	TC193089_2251_37_S
9.21	-1977	-3.39	0.00737	0.032658	11.49	0.00737	TC193090_807_37_S
9.77	1.03	1.64	0.13289	0.241088	2.7	0.13289	TC193091_3060_35_S
7.6	0.012	0.02	0.98547	0.990871	0	0.98547	TC193092_1632_40_S
11.19	6313	10.99	0	0.000596	120.74	0	TC193093_1036_41_X2
8.99	-1215	-1.47	0.17438	0.294089	2.15	0.17438	TC193094_93_41_X2
7.48	1078	1.81	0.1012	0.197462	3.29	0.1012	TC193095_643_39_S
10.04	4602	7.26	4e-05	0.001772	52.67	4e-05	TC193096_2080_40_S
9.4	3257	5.04	0.00059	0.007152	25.43	0.00059	TC193097_2277_40_S
8.31	2491	3.96	0.00296	0.018655	15.68	0.00296	TC193098_2397_35_S
8.66	-1651	-2.15	0.06125	0.136512	4.64	0.06125	TC193099_719_40_S
9.36	0.674	1.15	0.27851	0.414486	1.32	0.27851	TC193100_1675_35_S
8.85	0.74	1.05	0.31846	0.457348	1.11	0.31846	TC193101_1865_40_S
9.77	4039	6.05	0.00015	0.003606	36.59	0.00015	TC193102_1022_38_S
8.18	-0.217	-0.37	0.717	0.808757	0.14	0.717	TC193103_80_40_S
7.33	-0.962	-1.29	0.22984	0.360276	1.67	0.22984	TC193104_937_40_S
7.79	-3464	-4.55	0.00159	0.012904	20.69	0.00159	TC193105_864_36_S
8.37	1046	1.71	0.11928	0.222398	2.93	0.11928	TC193106_1149_40_S
7.9	1961	3.41	0.00714	0.032063	11.63	0.00714	TC193107_1404_37_S
7.79	-0.666	-1.16	0.27413	0.409992	1.35	0.27413	TC193108_195_36_S
7.24	1789	2.82	0.01884	0.059605	7.98	0.01884	TC193109_791_37_S
11.37	-0.448	-0.78	0.45558	0.590318	0.6	0.45558	TC193110_895_39_S
9.57	1582	2.76	0.02104	0.064268	7.61	0.02104	TC193111_966_35_S
9.25	2793	4.38	0.00155	0.012727	19.15	0.00155	TC193112_2437_39_S
9.5	0.572	0.97	0.35809	0.497281	0.93	0.35809	TC193113_1255_40_S
7.86	1645	2.83	0.01862	0.059058	8.02	0.01862	TC193114_2097_37_S
7.83	-2188	-3.12	0.01147	0.042972	9.75	0.01147	TC193115_394_39_S
8.19	1414	2.33	0.04358	0.107072	5.41	0.04358	TC193116_1834_40_S
10.24	-1493	-2.6	0.0276	0.077657	6.75	0.0276	TC193117_2070_39_S
9.26	-1688	-2.77	0.02077	0.063689	7.66	0.02077	TC193118_816_38_S
10.76	4886	7.39	3e-05	0.001639	54.66	3e-05	TC193119_1596_40_S
8.55	1826	2.45	0.03793	0.097138	6.02	0.03793	TC193120_783_40_S
8.31	-0.425	-0.74	0.47934	0.61202	0.54	0.47934	TC193121_38_41_X2
8.76	4971	7.64	2e-05	0.00149	58.3	2e-05	TC193122_2529_39_S
9.54	0.796	1.04	0.3262	0.46531	1.07	0.3262	TC193123_800_36_S
7.05	-1612	-1.78	0.11138	0.211445	3.15	0.11138	TC193124_769_35_S
7.21	0.174	0.23	0.82375	0.885771	0.05	0.82375	TC193126_471_41_X2
11.27	-2384	-4.12	0.0023	0.016032	16.97	0.0023	TC193127_112_40_S
8.52	2052	3.46	0.00658	0.030536	11.97	0.00658	TC193128_1558_40_S
10.41	6409	8.19	1e-05	0.00122	67.09	1e-05	TC193129_745_40_X6
7.88	0.425	0.71	0.49604	0.627366	0.5	0.49604	TC193130_1467_37_S
8.44	-0.371	-0.64	0.53772	0.663559	0.41	0.53772	TC193131_675_35_S
10.61	2918	4.63	0.00107	0.010266	21.42	0.00107	TC193132_1932_35_S
8.16	0.584	1	0.3409	0.480042	1	0.3409	TC193133_1083_37_S
9.95	2566	3.69	0.00453	0.024241	13.62	0.00453	TC193134_820_35_S
10.05	-1135	-1.45	0.17945	0.300274	2.1	0.17945	TC193135_788_35_S
9.06	4076	6.78	6e-05	0.002235	45.92	6e-05	TC193136_2034_40_S
8.16	-0.101	-0.15	0.88374	0.926005	0.02	0.88374	TC193137_664_35_S
6.93	-1.88	-2.71	0.02284	0.068153	7.35	0.02284	TC193138_619_35_S
8.25	-1435	-2.38	0.03994	0.100613	5.65	0.03994	TC193139_728_35_S
9.64	-0.527	-0.91	0.38611	0.524411	0.83	0.38611	TC193140_1314_35_S
8.23	1283	2.16	0.05758	0.13043	4.66	0.05758	TC193141_972_38_S
7.7	-3495	-5.78	0.00021	0.00432	33.43	0.00021	TC193142_773_37_S
7.69	0.211	0.3	0.77394	0.850372	0.09	0.77394	TC193143_767_40_S
8.29	-1.19	-1.99	0.07656	0.160813	3.94	0.07656	TC193144_901_35_S
7.84	1598	2.48	0.03382	0.089509	6.13	0.03382	TC193145_1732_39_S
7.24	0.397	0.57	0.57953	0.698365	0.33	0.57953	TC193146_722_35_S
11.31	0.243	0.38	0.70889	0.80241	0.15	0.70889	TC193147_1583_40_S
9.14	0.769	1.32	0.21862	0.347291	1.73	0.21862	TC193148_1461_35_S
6.73	0.302	0.37	0.7195	0.810674	0.14	0.7195	TC193149_1086_35_S
8.84	2037	3.1	0.01192	0.044019	9.6	0.01192	TC193150_1133_40_S
9.86	3043	3.9	0.00324	0.019673	15.22	0.00324	TC193151_1498_40_S
9.94	4044	5.5	0.00031	0.005144	30.23	0.00031	TC193152_966_39_S
6.97	-1.44	-1.84	0.09673	0.190967	3.39	0.09673	TC193153_936_34_X2
9.03	3979	5.12	0.00052	0.00674	26.25	0.00052	TC193154_818_36_S
9.75	1156	1.49	0.16968	0.288292	2.21	0.16968	TC193155_1437_35_S
9.02	0.38	0.66	0.52371	0.650968	0.44	0.52371	TC193156_439_39_S
7.95	1016	1.57	0.14888	0.262093	2.47	0.14888	TC193157_766_34_X2
10.41	1336	1.46	0.1756	0.295664	2.14	0.1756	TC193158_317_40_S
9.96	2269	3.89	0.00329	0.019842	15.15	0.00329	TC193159_760_40_S
8.46	0.932	1.52	0.16023	0.276663	2.32	0.16023	TC193160_968_38_S
8.94	2066	2.55	0.03	0.082325	6.49	0.03	TC193161_937_37_S
8.9	2383	3.5	0.00619	0.029425	12.23	0.00619	TC193162_1439_39_S
8.1	-1067	-1.73	0.11547	0.217102	3	0.11547	TC193163_691_40_S
11.55	-0.209	-0.28	0.78356	0.857724	0.08	0.78356	TC193164_688_37_X2
9.2	2856	4.83	0.00079	0.00862	23.35	0.00079	TC193165_1127_35_S
8.45	2648	3.99	0.00281	0.018157	15.94	0.00281	TC193166_822_37_X2
11.04	-0.147	-0.24	0.81235	0.877945	0.06	0.81235	TC193167_1223_40_S
9.19	1888	2.53	0.03372	0.089339	6.39	0.03372	TC193168_1014_38_S
8.04	-0.752	-1.27	0.23285	0.363629	1.62	0.23285	TC193169_1737_40_S
9.01	3852	5.38	0.00037	0.005637	28.9	0.00037	TC193170_812_40_S
10.39	1796	2.56	0.02964	0.081684	6.53	0.02964	TC193171_797_35_S
9.02	-0.86	-1.34	0.21262	0.340386	1.78	0.21262	TC193172_700_40_S
10.18	0.435	0.75	0.46947	0.603176	0.57	0.46947	TC193173_674_40_S
9.89	1776	2.82	0.01901	0.06002	7.95	0.01901	TC193174_1634_35_S
10.34	5173	8.53	1e-05	0.00106	72.73	1e-05	TC193175_1237_41_X2
6.44	1.22	1.83	0.09844	0.193317	3.35	0.09844	TC193176_701_40_S
7.62	-0.966	-1.66	0.12992	0.237178	2.75	0.12992	TC193177_1628_36_S
8.58	-0.746	-1.06	0.31334	0.452066	1.13	0.31334	TC193178_1137_35_S
9.52	-0.298	-0.52	0.61702	0.729214	0.27	0.61702	TC193179_1028_39_S
6.1	0.918	1.02	0.33333	0.472259	1.04	0.33333	TC193180_1537_39_S
7.84	-0.101	-0.14	0.89169	0.931518	0.02	0.89169	TC193181_195_40_S
9.6	3458	4.88	0.00074	0.008269	23.77	0.00074	TC193182_886_40_S
11.5	4658	6.8	6e-05	0.002215	46.27	6e-05	TC193183_814_35_S
10.17	2472	3.53	0.00585	0.028349	12.48	0.00585	TC193184_767_38_S
7.93	-1264	-1.77	0.10942	0.208936	3.12	0.10942	TC193185_746_35_S
8.49	0.563	0.69	0.50963	0.639094	0.47	0.50963	TC193186_2179_40_S
10.72	1294	2.23	0.05141	0.120813	4.96	0.05141	TC193187_1052_39_S
7.54	2.27	3.53	0.00587	0.028394	12.46	0.00587	TC193188_2592_35_S
12.01	0.892	1.41	0.1904	0.314008	1.99	0.1904	TC193189_924_40_S
7.49	0.515	0.74	0.47549	0.60858	0.55	0.47549	TC193190_345_34_X3
8.01	2354	2.39	0.03895	0.098968	5.72	0.03895	TC193191_72_35_S
8.58	1086	1.51	0.16419	0.281585	2.27	0.16419	TC193192_66_41_X2
9.63	1.03	1.3	0.22271	0.352296	1.7	0.22271	TC193193_14_41_S
8.45	1794	2.61	0.02723	0.076982	6.79	0.02723	TC193194_2005_35_S
12.71	-2368	-3.78	0.00392	0.022072	14.29	0.00392	TC193195_808_39_S
10.09	3235	4.53	0.00124	0.011206	20.48	0.00124	TC193196_800_34_X2
8.57	0.232	0.27	0.79333	0.865369	0.07	0.79333	TC193197_876_34_X3
10.65	6775	11.62	0	0.000579	134.93	0	TC193198_1009_38_S
11.28	0.474	0.68	0.51073	0.639933	0.47	0.51073	TC193199_1206_40_X2
9.53	2058	3.54	0.00579	0.028202	12.52	0.00579	TC193200_387_41_S
10.52	1554	2.56	0.02938	0.081189	6.56	0.02938	TC193201_1971_38_S
7.84	1825	3.15	0.01094	0.041752	9.93	0.01094	TC193202_1832_38_S
7.67	-0.16	-0.23	0.82165	0.884407	0.05	0.82165	TC193203_333_35_S
9.1	3131	5.12	0.00052	0.006748	26.22	0.00052	TC193204_1660_38_S
11.29	-1765	-3.01	0.01382	0.048191	9.06	0.01382	TC193205_1297_40_S
7.62	-0.176	-0.3	0.7712	0.848634	0.09	0.7712	TC193206_260_40_S
9.99	-0.754	-1.22	0.25087	0.38421	1.49	0.25087	TC193207_1554_40_S
8.39	-0.525	-0.89	0.3949	0.532696	0.79	0.3949	TC193208_778_40_S
10.49	-2536	-4.14	0.00223	0.015679	17.14	0.00223	TC193209_497_34_S
9.54	3487	5.33	0.00039	0.005814	28.4	0.00039	TC193210_573_37_X3
9.31	2902	4.73	0.00092	0.009419	22.33	0.00092	TC193211_655_40_S
9.47	1396	1.87	0.0923	0.18481	3.5	0.0923	TC193212_1031_40_S
11.78	-1936	-3.04	0.01324	0.047032	9.22	0.01324	TC193213_12_41_S
10.07	-1959	-3.1	0.01193	0.044019	9.6	0.01193	TC193214_35_40_S
6.55	-2469	-2.05	0.06882	0.148702	4.21	0.06882	TC193215_763_36_S
8.04	-0.617	-1.01	0.33771	0.476647	1.02	0.33771	TC193216_758_37_S
9.99	-0.426	-0.71	0.49712	0.628299	0.5	0.49712	TC193217_49_39_S
8.3	-0.023	-0.03	0.97604	0.984861	0	0.97604	TC193218_940_36_S
10.22	1405	2.44	0.0358	0.093194	5.97	0.0358	TC193219_698_40_S
10.52	5624	8.33	1e-05	0.001154	69.36	1e-05	TC193220_1015_40_S
8	-1446	-1.99	0.07608	0.160083	3.96	0.07608	TC193221_175_35_S
8.68	0.871	0.94	0.37056	0.509558	0.88	0.37056	TC193222_1758_40_S
8.79	-2224	-3.55	0.00567	0.027826	12.61	0.00567	TC193223_702_34_X2
10.47	6152	7.1	4e-05	0.001887	50.38	4e-05	TC193224_780_34_X2
8.12	0.717	1.2	0.2596	0.394478	1.44	0.2596	TC193225_1364_40_S
8.31	1528	2.61	0.02712	0.076837	6.8	0.02712	TC193226_1387_39_S
7.55	0.344	0.58	0.57244	0.69254	0.34	0.57244	TC193227_1809_40_S
8.32	1762	2.72	0.0223	0.06699	7.42	0.0223	TC193228_693_39_X2
10.14	7235	10.11	0	0.000688	102.16	0	TC193229_654_40_X2
9.29	1588	2.31	0.04458	0.108955	5.35	0.04458	TC193230_848_40_S
7.78	-2793	-4.29	0.00177	0.013722	18.41	0.00177	TC193231_738_35_S
8.2	0.481	0.68	0.51045	0.63971	0.47	0.51045	TC193232_318_40_S
9.1	-0.722	-1.24	0.24486	0.377364	1.54	0.24486	TC193233_2109_40_S
8.48	0.093	0.14	0.89541	0.933564	0.02	0.89541	TC193234_1395_36_S
[truncated: 22,341 more rows]
